1 Title: Lysosome-related organelles contain an expansion compartment that mediates  
2 delivery of zinc transporters to promote homeostasis.

3 Adelita D. Mendoza<sup>1\*</sup>, Nicholas Dietrich<sup>\*,1,2</sup>, Chieh-Hsiang Tan<sup>1,3</sup>, Daniel Herrera<sup>1</sup>,  
4 Jennysue Kasiah<sup>1</sup>, Zachary Payne<sup>1</sup>, Daniel L. Schneider<sup>1</sup>, Kerry Kornfeld<sup>1</sup>

5 <sup>1</sup>Department of Developmental Biology, Washington University School of Medicine, St.  
6 Louis, MO 63110

7 \*Equal contribution

8 2. Current address: NIEHS, Epigenetics and Stem Cell Biology Laboratory, National  
9 Institute of Environmental Health Sciences, National Institutes of Health, NC

10 3. Current address: Division of Biology and Biological Engineering, California Institute of  
11 Technology, 1200 E California Blvd, Pasadena, CA 91125

12

13 ABSTRACT

14 Lysosome-related organelles play evolutionarily conserved roles in zinc storage, but  
15 mechanisms that control zinc flow in and out are not well understood. In *C. elegans*  
16 intestinal cells, the CDF-2 transporter stores zinc in these organelles during excess.  
17 Here we identify ZIPT-2.3 as the transporter that releases zinc during deficiency. The  
18 expression levels of CDF-2 and ZIPT-2.3 are reciprocally regulated in zinc excess and  
19 deficiency, establishing a fundamental mechanism of homeostasis. Super-resolution  
20 microscopy demonstrated these organelles are composed of a spherical acidified  
21 compartment and a hemispherical expansion compartment. The expansion  
22 compartment inflates during zinc excess and deficiency by vesicle fusion delivering zinc  
23 transporters. These results identify an unexpected structural feature of lysosome-related  
24 organelles that facilitates rapid transitions in the composition of zinc transporters to  
25 mediate homeostasis.

26  
27 Zinc plays essential roles in the structure and function of many proteins, including a  
28 predicted ten percent of the human proteome (1, 2). Zinc deficiency and excess are  
29 both toxic, and organisms require mechanisms to obtain, store, and mobilize zinc to  
30 control the amount in each cell (3, 4). Two families of eukaryotic zinc transport proteins,  
31 the Zrt, Irt-like Proteins (ZIP) and the Cation Diffusion Facilitator proteins (CDF), play  
32 critical roles in zinc homeostasis. ZIP proteins increase zinc levels in the cytosol by  
33 transporting zinc into the cytosol from the extracellular space or intracellular stores,  
34 whereas CDF proteins lower zinc levels in the cytosol by transporting zinc from the  
35 cytosol into the extracellular space or intracellular organelles (5-7). In many organisms,  
36 lysosome-related organelles have emerged as a site of zinc storage, including the yeast  
37 vacuole (8, 9), the acidocalcisome in algae (10), the zincosome in mammals (11), and  
38 gut granules in *C. elegans* (12). Critical questions about zinc storage include, how do  
39 organisms sense zinc excess and promote storage in lysosome-related organelles, and  
40 how do organisms sense zinc deficiency and promote mobilization? Here we identify  
41 ZIPT-2.3 as the *C. elegans* transporter that mobilizes stored zinc. ZIPT-2.3 and CDF-2,  
42 the transporter that stores zinc, are reciprocally regulated in zinc excess and deficiency,

43 establishing a fundamental mechanism of homeostasis. Super-resolution microscopy  
44 revealed that lysosome-related organelles contain two compartments: an acidified  
45 compartment facilitates degradation of macromolecules and an expansion compartment  
46 facilitates transitions in the levels of zinc transporters to mediate homeostasis.

#### 47 **ZIPT-2.3 is a zinc transporter localized to lysosome-related organelles in** 48 **intestinal cells**

49 Fourteen *C. elegans* genes encode members of the ZIP protein family, named  
50 *zipt* genes (13, 14). Three of these genes, *zipt-2.1*, *zipt-2.3* and *zipt-7.1*, contain low  
51 zinc activation (LZA) enhancers in their promoter regions and are transcriptionally  
52 activated during zinc deficiency, suggesting these genes play roles in zinc homeostasis  
53 (13). To further explore regulation, we analyzed transcript levels of *zipt* genes in zinc  
54 excess. *zipt-2.3* mRNA levels were significantly lower in excess zinc conditions. This is  
55 a specific regulatory response, since 13 other *zipt* genes did not display significant  
56 regulation (Fig. S1i). Based on regulatory control in zinc deficiency and excess, we  
57 focused on *zipt-2.3*, which includes five exons and generates an 1108 nucleotide mRNA  
58 (Fig. 1a). The ZIPT-2.3 protein is highly similar to *Homo sapiens* ZIP2, *Drosophila*  
59 *melanogaster* dZip1(15), and *Danio rerio* DrZIP1 (16), suggesting these genes derived  
60 from a common ancestral gene (Fig. S2b).

61 Many ZIP proteins transport zinc, but some have been shown to transport iron or  
62 other metals (17). To directly test the ability of ZIPT-2.3 to transport zinc, we expressed  
63 ZIPT-2.3 by transient transfection in human embryonic kidney cells (HEK293T) and  
64 used radioactive zinc to determine the rate of zinc uptake. Compared to vector-only  
65 control cells, cells expressing ZIPT-2.3 displayed a significant increase in the rate of  
66 zinc uptake (Fig. 1b). Thus, ZIPT-2.3 was sufficient to promote zinc uptake, consistent  
67 with the model that ZIPT-2.3 is a physiological zinc transporter (Fig. S2c).

68 To determine the localization of ZIPT-2.3, we generated transgenic animals  
69 expressing the *zipt-2.3* promoter and coding region fused to the coding region of  
70 mCherry (Fig. 1a'). This ZIPT-2.3::mCherry protein appears to be functional, since it  
71 rescued the *zipt-2.3(lf)* phenotype of impaired growth in zinc deficient conditions (Fig.  
72 S2d). When imaged with spinning disk confocal microscopy, transgenic animals

73 cultured in zinc replete medium displayed a punctate pattern of expression in intestinal  
74 cells, suggestive of localization to gut granules (Fig. 1c); Chapman *et al.* (2019)  
75 reported a similar localization pattern and identified a role for *zipt-2.3* in germline  
76 apoptosis (18). To characterize this punctate pattern, we used LysoTracker, a dye that  
77 stains acidified lysosomes. ZIPT-2.3::mCherry colocalized with LysoTracker, indicating  
78 that ZIPT-2.3 localizes to the membrane of gut granules in intestinal cells (Fig. 1c).

79 Intestinal gut granules are the major site of zinc storage when worms are  
80 cultured with excess zinc, and the CDF-2 transporter localizes to these organelles and  
81 promotes zinc storage (12, 19). To determine if ZIPT-2.3 and CDF-2 localize to the  
82 same organelles, we generated transgenic animals that express CDF-2::GFP and ZIPT-  
83 2.3::mCherry (Fig. S2a). In zinc-replete culture medium, the gut granules appear  
84 spherical, and CDF-2::GFP and ZIPT-2.3::mCherry display complete colocalization (Fig.  
85 1c middle). When animals are exposed to excess zinc, many gut granules display a  
86 bilobed morphology; CDF-2::GFP is localized to the membrane of both lobes, whereas  
87 LysoTracker is only localized to one lobe (12). Interestingly, ZIPT-2.3::mCherry was  
88 only localized to the LysoTracker positive lobe (Fig. 1c right). Thus, CDF-2 and ZIPT-  
89 2.3 colocalize partially during zinc excess, with both proteins on the LysoTracker  
90 positive lobe and only CDF-2 on the LysoTracker negative lobe. To examine zinc  
91 deficient conditions, we cultured animals with the zinc chelator N,N,N',N'-Tetrakis(2-  
92 pyridylmethyl)ethylenediamine (TPEN). In zinc deficient conditions, CDF-2 and ZIPT-2.3  
93 displayed partial colocalization. Gut granules displayed a LysoTracker positive lobe that  
94 contains both CDF-2 and ZIPT-2.3 and a small LysoTracker negative lobe that contains  
95 CDF-2 but not ZIPT-2.3 (Fig. 1c left). Thus, gut granules in intestinal cells are spherical  
96 in zinc replete conditions and remodeled during zinc excess and deficiency; in both zinc  
97 extremes there is a LysoTracker positive lobe that contains CDF-2 and ZIPT-2.3, and a  
98 LysoTracker negative lobe that contains CDF-2 but not ZIPT-2.3.

### 99 **Genetic analysis demonstrates that *zipt-2.3* promotes mobilization of zinc from** 100 **gut granules and influences cytosolic levels of zinc**

101 Based on the localization and transport activity of ZIPT-2.3, we predicted that a  
102 *zipt-2.3* loss-of-function (*lf*) mutant would be defective in mobilizing zinc stored in gut  
103 granules. To test this prediction, we analyzed the *ok2094* mutation that removes 1561

104 base pairs of *zipt-2.3*, including all of exons 2 and 3 and part of exon 4 (Fig. 1a). These  
105 exons encode highly conserved regions of the protein, suggesting *zipt-2.3(ok2094)* is a  
106 strong loss-of-function or null allele. We used an established assay based on the  
107 localization to gut granules of the zinc dye FluoZin-3 AM (12). Wild-type and *zipt-2.3(lf)*  
108 animals cultured with supplemental zinc and FluoZin-3 AM for 16 hours displayed  
109 strong fluorescence in gut granules, indicating robust zinc storage (Figure 1d). When  
110 shifted to zinc replete or deficient conditions, wild-type animals displayed a significant  
111 decrease in fluorescence after 24 or 48 hours, indicating stored zinc is mobilized from  
112 the gut granules. By contrast, *zipt-2.3(lf)* animals did not display reduced fluorescence,  
113 indicating a failure to mobilize stored zinc (Fig. 1d-f). Thus, ZIPT-2.3 was necessary to  
114 mobilize zinc from the gut granules.

115 If *zipt-2.3* releases stored zinc, then we predict that *zipt-2.3(lf)* mutants would  
116 have lower levels of cytosolic zinc compared to wild type. To test this prediction, we  
117 analyzed the expression level of zinc-regulated genes as a surrogate marker for  
118 cytosolic zinc levels. *zipt-2.1* and *F44E7.5* are activated by zinc deficient conditions  
119 (13), and the mRNA levels of both genes were increased significantly in *zipt-2.3(lf)*  
120 mutant animals compared to wild type, suggesting cytosolic zinc levels are decreased in  
121 these mutant animals (Fig. 1g). To determine if *zipt-2.3* is sufficient to increase cytosolic  
122 zinc levels, we overexpressed *zipt-2.3* in intestinal cells. We generated a transgenic  
123 strain containing multiple copies of *zipt-2.3* controlled by the *ges-1* promoter (*zipt-*  
124 *2.3(oe)*) that is constitutively expressed in intestinal cells (Fig. 1a"). *mtl-1* and *cdf-2* are  
125 activated by zinc excess conditions (19, 20), and the mRNA levels of both genes were  
126 increased significantly in *zipt-2.3(oe)* mutant animals compared to wild type, suggesting  
127 cytoplasmic zinc levels are increased in these mutant animals (Fig. 1h). Thus, *zipt-2.3*  
128 was necessary to release stored zinc and maintain normal levels of cytosolic zinc and  
129 sufficient to increase cytosolic zinc levels.

### 130 ***zipt-2.3* promotes organismal zinc homeostasis**

131 To investigate the function of *zipt-2.3* in organismal zinc homeostasis, we  
132 analyzed the growth rate of wild type and *zipt-2.3(lf)* animals in zinc deficient conditions.  
133 Synchronized L1 stage animals were cultured for 72 hours, and length was determined  
134 as a quantitative measure of growth (12). In zinc replete medium, wild-type and *zipt-*

135 2.3(*lf*) animals grew and developed to similar sized adults. In zinc deficient conditions,  
136 wild-type animals displayed a slight, dose dependent growth inhibition. By contrast, *zipt-*  
137 2.3(*lf*) mutants displayed severe growth defects, indicating hypersensitivity to zinc  
138 deficient conditions (Fig. 2a). Mutations of six other *zipt* genes did not cause  
139 hypersensitivity, suggesting this phenotype is specific for loss of *zipt-2.3* (Fig. S1c-h).  
140 Furthermore, the *zipt-2.3(lf)* phenotype was specific for zinc deficiency, since these  
141 mutant animals did not display hypersensitivity to the iron chelator 2,2-bipyridyl or the  
142 manganese chelator diaminocyclohexanetetraacetic acid (DCTA) (Fig. 2b, S1b).  
143 Furthermore, *zipt-2.3(oe)* animals displayed hypersensitivity to excess zinc compared to  
144 the wild type (Fig. 2c). Thus, *zipt-2.3* was necessary for growth and development in zinc  
145 deficient conditions and sufficient to cause hypersensitivity to high zinc toxicity.

146 The CDF-2 protein promotes storage in zinc excess conditions; *cdf-2(lf)* mutant  
147 animals displayed hypersensitivity to growth defects caused by high zinc toxicity but  
148 displayed normal growth in zinc deficient conditions (Fig. 2d). By contrast, *zipt-2.3(lf)*  
149 animals displayed hypersensitivity to growth defects caused by zinc deficiency but  
150 displayed normal growth in zinc excess conditions (Fig. 2e). To test the prediction that  
151 gut granules themselves are critical for zinc homeostasis, we examined animals with a  
152 mutation in *glo-1* that are defective in forming gut granules (21). *glo-1(lf)* animals were  
153 hypersensitive to growth defects caused by zinc deficiency and excess, demonstrating  
154 the central role of gut granules in zinc homeostasis (Fig. 2f).

155 When wild-type animals are exposed to excess zinc early in life, they display  
156 resistance to growth defects caused by zinc deficiency later in life, presumably because  
157 they mobilize stored zinc (Fig. 2g) (12). We predicted that *zipt-2.3* is necessary to take  
158 advantage of stored zinc. Consistent with this prediction, *zipt-2.3(lf)* mutants did not  
159 display increased resistance when exposed to excess zinc early in life (Fig. 2h). *glo-1(lf)*  
160 mutants displayed a similar defect, consistent with the central role of gut granules in  
161 zinc storage and release (Fig. 2i).

### 162 **Reciprocal regulation of ZIPT-2.3 and CDF-2 mediates zinc homeostasis**

163 *cdf-2* mRNA levels increase in excess zinc conditions, and *zipt-2.3* mRNA levels  
164 increase in zinc deficient conditions (12, 19). To further analyze regulatory control, we  
165 cultured wild-type animals for 16 hours with 40 $\mu$ M TPEN (zinc deficient), 200 $\mu$ M

166 supplemental zinc (zinc excess), or no supplemental zinc or TPEN (zinc replete) and  
167 analyzed mRNA. In zinc deficient conditions, the level of *zipt-2.3* mRNA was increased  
168 significantly and the level of *cdf-2* mRNA was decreased significantly compared to  
169 replete conditions. By contrast, in zinc excess conditions the level of *zipt-2.3* mRNA was  
170 decreased significantly and the level of *cdf-2* mRNA was increased significantly  
171 compared to replete conditions (Fig. 2j). Reciprocal regulatory control of CDF-2 and  
172 ZIPT-2.3 was also observed at the level of protein expression (Fig. 2k). These results  
173 suggest a mechanism for directional flow of zinc from the cytosol into the lumen of gut  
174 granules during excess, when CDF-2 levels are high and ZIPT-2.3 levels are low, and  
175 from the lumen of gut granules back into the cytosol during deficiency, when ZIPT-2.3  
176 levels are high and CDF-2 levels are low.

177 **Super resolution microscopy reveals that gut granules are composed of two**  
178 **compartments that are remodeled in response to zinc excess and deficiency**

179 If zinc homeostasis is regulated by shifting the ratio of CDF-2 and ZIPT-2.3, then  
180 mechanisms must exist to achieve dynamic changes in the composition of zinc  
181 transporters on the membranes of lysosome-related organelles. To define these  
182 mechanisms, we observed individual organelles at 120 nm resolution using super  
183 resolution microscopy. Animals raised in zinc replete medium were transferred to zinc  
184 deficient, replete, or excess conditions for 16 hours and visualized with three different  
185 fluorescent markers. One strain expressed CDF-2::GFP (labeled as red) and ZIPT-  
186 2.3::mCherry (labeled as green) and was stained with LysoTracker (labeled as blue)  
187 (Fig. 3a-d) (22). The second strain expressed CDF-2::mCherry (labeled as red) and was  
188 stained with LysoTracker (labeled as blue) and FluoZin-3 AM (labeled as yellow), which  
189 stains labile zinc (Fig. 3e-h). Individual organelles that did not overlap neighboring  
190 organelles were reconstructed in three dimensions, and maximum intensity projections  
191 (MIP) and line scans were used to estimate volumes and determine spatial relationships  
192 between markers. The MIP is a composite of all planes of a z-stack obtained during  
193 imaging, and thus represents the entire granule. For clarity of presentation, we applied a  
194 distinct arbitrary color for each marker: CDF-2 is red, ZIPT-2.3 is green, LysoTracker is  
195 blue, and labile zinc is yellow (Fig. 3-4, S3-4, 6-11).

196 As depicted in Figure 3j, the results revealed that lysosome-related organelles  
197 are composed of two compartments in all zinc conditions: an **acidified compartment**  
198 that stains with LysoTracker, and an **expansion compartment** that is LysoTracker  
199 negative. The **acidified compartment membrane** contains both CDF-2 and ZIPT-2.3  
200 and surrounds the spherical acidified compartment. The acidified compartment has two  
201 regions - the **LysoTracker region** forms the center of the sphere and stains strongly  
202 with LysoTracker and weakly with FluoZin-3 AM, whereas the **zinc region** forms the  
203 periphery of the sphere and stains strongly with FluoZin-3 AM but is depleted for  
204 LysoTracker staining. The zinc region appears as a crescent adjacent to the interface  
205 membrane in zinc excess conditions. The expansion compartment is a hemisphere that  
206 is dynamic in shape and volume. The **expansion compartment membrane** contains  
207 CDF-2 but not ZIPT-2.3 and appears to be attached to the acidified compartment  
208 membrane. The expansion compartment and the acidified compartment are separated  
209 by a portion of the acidified compartment membrane that we named the **interface**  
210 **membrane**.

211 To understand remodeling of compartments in response to changes in zinc  
212 levels, we measured compartment volumes. Volume calculations were based on the  
213 assumption that the compartments were spheres, hollow spheres, or hemispherical  
214 segments, which is based on our microscope images (Fig. S5). Our results below are  
215 summarized in Figure 4a.

216 In zinc replete conditions, gut granules are approximately spherical with a total  
217 average volume of  $\sim 7.6 \mu\text{m}^3$  (Fig. 3e,k,S12a,b,i). The prominent acidified compartment  
218 represents 83% of the total volume, with a large LysoTracker region ( $\sim 5.9 \mu\text{m}^3$ ) and a  
219 small zinc region ( $\sim 0.6 \mu\text{m}^3$ , Fig. S12e-h). The expansion compartment is contracted,  
220 with a total volume of  $\sim 1.2 \mu\text{m}^3$ , representing 17% of the total volume (Fig. S12,a-d).  
221 Although contracted, the expansion compartment can be visualized with super  
222 resolution microscopy in zinc replete conditions (Fig. 3a,S7). In many cases, the line  
223 scan reveals that the CDF-2 boundary (red line) is outside the ZIPT-2.3 boundary  
224 (green line), indicating the line scan passes through the expansion compartment  
225 membrane before passing through the acidified compartment membrane (Fig. 3c,c',c'').



226 The ZIPT-2.3 membrane coincides closely with LysoTracker (Fig. S7). The LysoTracker  
227 and FluoZin-3 staining overlap extensively, with only a small zinc region outside the  
228 LysoTracker boundary (Fig. 3e). Overall, lysosome-related organelles in zinc replete  
229 medium appear to have stable membrane dynamics, store a small amount of zinc, and  
230 be primarily engaged in breaking down macromolecules in the prominent acidified  
231 compartment.

232 After 16 hours in zinc excess conditions, gut granules increase in total volume  
233 about 60% to an average of  $\sim 12.0 \mu\text{m}^3$  (Fig. 3e,k). The prominent expansion  
234 compartment is shaped like a hemisphere and increases about 8-fold to  $\sim 9.3 \mu\text{m}^3$ ; this  
235 represents 76% of the total volume (S12a-d). The acidified compartment is spherical  
236 and shrinks overall to  $2.7 \mu\text{m}^3$ , which is 24% of the total volume; this represents a large  
237 decrease in the LysoTracker region to  $1.8 \mu\text{m}^3$  while the zinc region increases to  $\sim 0.9$   
238  $\mu\text{m}^3$ . In most cases, the line scans reveal that the CDF-2 boundary (red line) is  
239 coincident with the ZIPT-2.3 boundary (green line) as it passes through the acidified  
240 compartment membrane (Fig. 3a,d, S3). In most cases there is a distinct zinc region  
241 shaped like a crescent: line scans reveal FluoZin-3 staining extends beyond the  
242 LysoTracker stain and is coincident with the CDF-2 membrane, indicating the crescent  
243 of zinc is in the acidified compartment rather than the expansion compartment (Fig.  
244 3e,h'). Both the LysoTracker region and the zinc region are contained within the acidified  
245 compartment membrane and the interface membrane (Fig. 3,e,h-h'', S11). Overall,  
246 lysosome-related organelles in zinc excess appear to have active membrane dynamics  
247 driving a growing expansion compartment and a large amount of zinc localized in a  
248 crescent shape; the structure suggests they are primarily engaged in zinc storage with a  
249 relatively small acidified compartment breaking down macromolecules.

250 After 16 hours in zinc deficient conditions, gut granules increase slightly to a total  
251 average volume of  $\sim 8.3 \mu\text{m}^3$  (Fig. 3e,k). An expansion compartment shaped like a  
252 hemisphere is frequently visible with an average volume of  $\sim 2.0 \mu\text{m}^3$ ; this is about 60%  
253 larger than in replete conditions, and it represents 25% of the total volume of the  
254 organelle. The acidified compartment is spherical and shrinks slightly to  $\sim 6.3 \mu\text{m}^3$ , which  
255 is 75% of the total volume; this represents a small decrease in the LysoTracker region

256 to  $\sim 5.3 \mu\text{m}^3$  while the zinc region slightly increases to  $\sim 1.0 \mu\text{m}^3$  (Figure 3b,f,k). Overall,  
257 lysosome-related organelles in zinc deficiency appear to have active membrane  
258 dynamics leading to a larger expansion compartment and a mostly unchanged acidified  
259 compartment; the structure suggests they are primarily engaged in zinc release with an  
260 acidified compartment breaking down macromolecules.

261 In excess zinc conditions, the volume of gut granules varied  $\sim 10$ -fold; of eleven  
262 analyzed in detail, the smallest was  $\sim 2.2 \mu\text{m}^3$  and the largest was  $\sim 33.3 \mu\text{m}^3$  (Fig. 3i,  
263 S11). Interestingly, the overall shape and proportions appeared to be similar despite  
264 these size differences. To rigorously determine how the proportions of gut granules  
265 scale with size, we analyzed the correlations between the volumes of the LysoTracker  
266 region, zinc region, and expansion compartment and the total volume. In zinc excess  
267 and deficiency, the expansion compartment and LysoTracker region positively  
268 correlated with the total volume, indicating that the gut granules have a similar  
269 composition regardless of size (Fig. S13). In zinc replete conditions, only the  
270 LysoTracker region positively correlated with total volume (Fig. S13).

### 271 **Vesicles appear to deliver zinc transporters to lysosome-related organelles and** 272 **mediate the volume change of the expansion compartment**

273 In zinc excess conditions, we frequently observed small, spherical vesicles that  
274 were positive for CDF-2 adjacent to or fusing with the expansion compartment. In zinc  
275 deficient conditions, we occasionally observed such vesicles (Fig. 4c). Based on these  
276 observations we propose that vesicle fusion is responsible for delivering CDF-2 to gut  
277 granules in zinc excess conditions and is the source of the increase in the extent of the  
278 expansion compartment membrane. Similarly, we propose that vesicle fusion is  
279 responsible for delivering ZIPT-2.3 to gut granules in zinc deficient conditions and is the  
280 source of the increase in the extent of the expansion compartment membrane. The  
281 process seems to be robust in zinc excess conditions, resulting in the appearance of  
282 many vesicles and a dramatic increase in the volume of the expansion compartment;  
283 the process is less robust in zinc deficient conditions, since fewer vesicles were  
284 observed and the change in the expansion compartment is subtler (Fig. 4a).

285           Based on these observations and previous studies of zinc-regulated  
286 transcription, we propose an integrated model of zinc homeostasis (Fig. 4b). In zinc  
287 excess conditions, high levels of cytoplasmic zinc lead to activation of the high zinc  
288 sensor HIZR-1(23). When zinc binds the HIZR-1 ligand-binding domain (LBD), HIZR-1  
289 translocates to the nucleus where its DNA binding domain (DBD) interacts with the High  
290 Zinc Activation (HZA) enhancer, increasing *cdf-2* transcription. By contrast, transcription  
291 of *zipt-2.3* is decreased by a mechanism that has not been established. Increased  
292 levels of *cdf-2* transcripts result in increased translation of CDF-2 protein in the  
293 endoplasmic reticulum and the generation of vesicles that fuse with the expansion  
294 compartment of gut granules. Vesicle fusion adds membrane and increases the volume  
295 of the expansion compartment, and the increased levels of CDF-2 promote zinc  
296 transport and detoxification. Zinc that is imported into the expansion compartment or the  
297 acidified compartment is concentrated in the zinc region (Fig. 4b, lower). In zinc replete  
298 conditions, transcription of *cdf-2* and *zipt-2.3* are balanced, and only a small number of  
299 vesicles fuse with gut granules, so the expansion compartment is contracted (Fig. 4b  
300 middle). In zinc deficient conditions, the Low Zinc Activation (LZA) enhancer is  
301 activated, leading to increased levels of *zipt-2.3* transcripts. By contrast the *cdf-2*  
302 promoter is repressed by an unknown mechanism. Increased levels of *zipt-2.3*  
303 transcripts result in increased translation of ZIPT-2.3 protein in the endoplasmic  
304 reticulum and the generation of vesicles that fuse with the expansion compartment of  
305 gut granules. Vesicle fusion enlarges the expansion compartment slightly, and the  
306 increased levels of ZIPT-2.3 promote zinc export (Fig. 4b upper).

## 307 **Discussion**

308           CDF-2 was previously identified as the transporter that stores zinc in gut  
309 granules (12), but the mechanism of release was not defined. Here we identify ZIPT-2.3  
310 as the zinc transporter that mediates release of stored zinc from gut granules. Cell-  
311 based assays demonstrated that ZIPT-2.3 protein transports zinc, microscopy studies  
312 showed specific localization in lysosome-related organelles, and analysis of loss-of-  
313 function and gain-of-function mutants documented multiple phenotypes consistent with

314 a role in mobilizing stored zinc. This is an important advance because it defines the pair  
315 of transporters that mediate zinc storage and release.

316 ZIPT-2.3 and CDF-2 display dramatic and reciprocal regulation in response to  
317 zinc conditions, identifying one mechanism for directional storage and release. In the  
318 transition from zinc deficient to zinc excess conditions, *cdf-2* transcript levels increase  
319 ~6 fold and *zipt-2.3* transcript levels decrease ~130 fold. Increased transcription of *cdf-2*  
320 in zinc excess conditions is mediated by the HIZR-1 nuclear receptor transcription factor  
321 and the HZA enhancer, and increased transcription of *zipt-2.3* in zinc deficient  
322 conditions is mediated by the LZA enhancer. The mechanism of *cdf-2* repression in zinc  
323 deficiency and *zipt-2.3* repression in zinc excess have not been defined, and the  
324 identification of these regulatory events establishes the foundation for future studies to  
325 define these control mechanisms.

326 Lysosome-related organelles are typically considered to be spherical and  
327 surrounded by a single lipid bilayer. Roh *et al.* (2012) first identified bilobed granules in  
328 zinc excess using the CDF-2 marker and confocal microscopy. However, these studies  
329 did not characterize the structure in detail or establish its function. Here we used super  
330 resolution microscopy to gain important new insights into this structural feature of  
331 lysosome-related organelles. Whereas Roh *et al.* (2012) suggested bilobed granules  
332 were a specialization for high zinc, here we demonstrate that the expansion  
333 compartment is a permanent structural feature of lysosome-related organelles. In zinc  
334 replete conditions, the expansion compartment is contracted and difficult to appreciate  
335 with standard confocal microscopy but detectable by super-resolution techniques.  
336 Furthermore, the expansion compartment inflates in both zinc excess and deficiency,  
337 indicating it is not a specific adaptation for one zinc extreme but rather a response to  
338 changes in zinc levels. Whereas Roh *et al.* (2012) suggested that labile zinc  
339 accumulates in the expansion compartment during zinc excess, super-resolution  
340 microscopy reveals that labile zinc accumulates in the acidified compartment, not the  
341 expansion compartment, and it is concentrated in a crescent at the interface membrane.  
342 The mechanism that directs stored zinc to this location is unknown. Roh *et al.* (2012) did  
343 not establish how the expansion compartment increases in volume. The results

344 presented here suggest the expansion compartment increases in volume by fusion of  
345 vesicles containing CDF-2 in zinc excess, thereby increasing the capacity for zinc  
346 storage and detoxification, and by the fusion of vesicles containing ZIPT-2.3 in zinc  
347 deficiency, thereby increasing the capacity for zinc mobilization, Whereas Roh *et al.*  
348 (2012) did not establish the function of the expansion compartment, the results  
349 presented here indicate that the expansion compartment allows rapid changes in the  
350 composition of zinc transporters while preserving the pH of the acidified compartment  
351 by providing a separate compartment for vesicle fusion. The enhanced resolution of  
352 these microscopy techniques combined with the identification of CDF-2 and ZIPT-2.3  
353 provide surprising new insights into the structure of lysosome-related organelles and  
354 mechanisms of zinc homeostasis, and they raise a new set of fascinating questions. Are  
355 all transmembrane proteins delivered to the expansion compartment membrane, or are  
356 some delivered directly to the acidified compartment membrane? What mechanism  
357 allows CDF-2 to localize to the membrane of both compartments, whereas ZIPT-2.3  
358 localizes specifically to the acidified compartment membrane? How is zinc concentrated  
359 next to the interface membrane? Is the expansion compartment an evolutionarily  
360 conserved structural feature of lysosome-related organelles in other species that store  
361 zinc in these structures? In humans, ZIP8 releases zinc stored in lysosomes of T cells  
362 (23), and ZIP13, a gene implicated in the connective tissue disorder spondylocheiro  
363 dysplastic Ehlers-Danlos syndrome, releases zinc from intracellular vesicles (24, 25).  
364 Thus, ZIP proteins likely play a conserved role in releasing zinc, and the new paradigm  
365 for zinc regulation through organelle remodeling described here might also be  
366 conserved. These results highlight that lysosome-related organelles are multifunctional  
367 – in addition to the canonical function of macromolecule degradation in the acidified  
368 compartment, they function as a site of zinc storage, and the expansion compartment is  
369 an unexpected structural feature that promotes this dual function.

370

### 371 **Acknowledgments:**

372 We thank Laura Kyro for graphics and Suzanne Pfeffer for advice. **Funding:**

373 Confocal/super-resolution data was generated on a Zeiss LSM 880 Airyscan Confocal

374 Microscope which was purchased with support from the Office of Research  
375 Infrastructure Programs (ORIP), a part of the NIH Office of the Director under grant  
376 OD021629. This research was funded NIH award R01 GM068598 to KK. C.H.T. was a  
377 scholar of the McDonnell International Scholars Academy. ADM was supported by the  
378 T32HLHL7081 training grant. **Author Contributions:** Conceptualization: A.D.M, N.D.,  
379 and K.K.; Methodology: A.D.M., N.D., J.T., and K.K.; Formal Analysis: A.D.M., N.D.,  
380 J.T., and K.K.; Investigation: A.D.M., N.D., J.T., C.C., D.H., J.K., Z.P., D.L.S.; Writing-  
381 Original Draft: A.D.M., N.D., and K.K., Writing- Review & Editing: A.D.M., N.D., J.T.,  
382 C.C., D.H., J.K., Z.P., D.L.S., and K.K.; Visualization: A.D.M., N.D., and J.T.;  
383 Supervision: K.K.; Funding acquisition: K.K.. **Competing interests:** The authors  
384 declare no competing interests. **Data and materials availability:** All data is available in  
385 the manuscript or supplementary materials.

## 386 **Experimental Procedures**

### 387 **General Methods and Strains**

388 *C. elegans* strains were cultured at 20°C on nematode growth medium (NGM) dishes  
389 with a lawn of *E. coli* OP50 unless otherwise noted (28). The Bristol N2 strain was wild  
390 type and parental strain of all mutants. The following mutations and transgenes were  
391 used: *zipt-2.3(ok2094) II* (29), *cdf-2(tm788) X* (19), *glo-1(zu391) X* (21), *amEx132(cdf-*  
392 *2::mCherry;rol-6<sup>D</sup>)(12)*, *amls4(cdf-2::GFP::unc-119(+))*. The following transgenic strains  
393 were generated for this study: WU1816 (*zipt-2.3p::ZIPT-2.3::mCherry(amEx348)*),  
394 WU1824 (*ges-1p::zipt-2.3::T7(amEx350)*), WU1984 *cdf-2(tm788);amls4; zipt-*  
395 *2.3p::ZIPT-2.3mCherry (amEx191)*, and *zipt-2.3(ok2094);zipt-2.3p:: ZIPT-2.3::mCherry*  
396 (*amEx348*).

### 397 **Measuring worm growth with metal excess or chelation.**

398 Gravid adult hermaphrodites were treated with bleach and sodium hydroxide, eggs were  
399 incubated in M9 solution overnight to allow hatching and synchronized arrest at the L1  
400 larval stage, and L1 animals were transferred to noble agar minimum media (NAMM)  
401 dishes (18). For metal deficiency studies, NAMM was supplemented with N,N,N',N'-  
402 tetrakis(2-pyridylmethyl)ethane-1,2-diamine (TPEN, Sigma-Aldrich), a zinc-specific  
403 chelator, 2,2-bipyridyl (Sigma-Aldrich), an iron specific chelator, or 1,2-  
404 Diaminocyclohexanetetraacetic acid monohydrate (Sigma-Aldrich), a manganese  
405 specific chelator. For zinc excess studies, NAMM was supplemented with ZnSO<sub>4</sub>  
406 (Sigma Aldrich). Dishes were seeded with 5x concentrated *E. coli*. After culturing for 3  
407 days, animals were paralyzed in a 10 mM sodium azide solution in M9 and mounted on  
408 a 2% agarose pad on a microscope slide. Images were captured using a Zeiss Axioplan  
409 2 microscope equipped with a Zeiss AxioCam MRm digital camera. Lengths of  
410 individual animals were measured using ImageJ software by drawing a line from the  
411 nose to the tip of the tail of each animal.

412 To analyze growth after a short period of exposure to excess zinc (Fig. 2G-I), we  
413 bleached gravid adults to obtain arrested L1 larvae as described above. These animals  
414 were cultured on NAMM dishes supplemented with either 0 or 25µM zinc for 16 hours.  
415 Animals were washed with M9 containing 0.01% Tween-20, cultured on NAMM dishes  
416 containing 0, 10, 20, or 30 µM TPEN seeded with 5x concentrated *E. coli* OP50 for 3  
417 days, and the length of each animal was determined as described above.

### 418 **Spinning Disk Microscopy**

419 Transgenic L4 stage animals expressing CDF-2::GFP and ZIPT-2.3::mCherry were  
420 cultured for 16 hours in LysoTracker blue on standard NAMM dishes or dishes  
421 containing 50 µM TPEN or 200 µM ZnSO<sub>4</sub>. LysoTracker Blue (Invitrogen) was diluted in  
422 *E. coli* OP50 to obtain a concentration of 1 µM, respectively, and dispensed on either  
423 zinc deficient, replete, or excess dishes. Animals were anesthetized in 50 µM NaN<sub>3</sub>,  
424 mounted on an agar pad, and sealed with a coverslip. Microscopy was performed with  
425 the Nikon Spinning Disk confocal microscope using the 405, 488, and 561 laser lines to  
426 detect, LysoTracker Blue, CDF-2::GFP, and ZIPT-2.3::mCherry, respectively. All images  
427 were captured using the 60x objective.

## 428 **Zinc Uptake Assay**

429 Zinc uptake assays were performed as described in Zhao *et al.* (2018) with the same  
430 set of controls (14). Briefly, HEK293T cells were seeded on Poly-D- lysine coated 24-  
431 well plates (Corning). The next day the cells were transfected with a plasmid encoding  
432 ZIPT-2.3 or pcDNA-3.1(+) (a vector only control) using Lipofectamine 2000 (Invitrogen).  
433 After 48 hours, cells were washed once with pre-warmed uptake buffer (15 mM HEPES,  
434 100 mM glucose, 150 mM KCl, pH 7.0) and incubated for 15 minutes in pre-warmed  
435 uptake buffer that contained the radioactive tracer  $^{65}\text{ZnCl}_2$  (PerkinElmer) and non-  
436 radioactive  $\text{ZnCl}_2$  (Sigma). Uptake was halted by applying the same volume of ice-cold  
437 stop buffer (15 mM HEPES, 100 mM glucose, 150 mM KCl, 1 mM EDTA, pH 7.0). Cells  
438 were gently washed with ice-cold stop buffer twice and disassociated with trypsin.  
439 Radioactivity incorporated into the cells was measured with a Beckman LS 6000  
440 Scintillation Counter. In parallel experiments conducted without adding metals, the cells  
441 were lysed with lysis buffer (2 mM Tris-HCl, 150 mM NaCl, 1% Triton X- 100), and  
442 protein levels were measured with the Bio-Rad DC protein assay.  $^{65}\text{Zn}$  uptake was  
443 normalized to total protein measured in this parallel assay. The data shown in Figure 1b  
444 are typical of multiple independent experiments.

445

## 446 **Plasmid DNA construction and transgenic strain generation**

447 To generate an epitope tagged construct expressing *zipt-2.3*, we used *C. elegans* wild-  
448 type genomic DNA as a template, and the polymerase chain reaction (PCR) was used  
449 to amplify DNA fragments with Phusion polymerase (New England Biolabs) of the  
450 genomic sequence using a forward primer that starts from 2199 bases upstream of the  
451 ATG start codon of *zipt-2.3* and a reverse primer that contained the codon preceding  
452 the stop codon of *zipt-2.3* and the coding sequence of the T7 epitope  
453 (MASMTGGQQMG). Amplified DNA was ligated into pBluescript SK+ along with the  
454 DNA of the *unc-54* 3' untranslated region. The mCherry plasmid (pND32) was  
455 generated by amplifying the promoter and coding region of *zipt-2.3* by PCR and cloning  
456 into the plasmid pSC6, which contains mCherry upstream of the *unc-54* 3' UTR. To  
457 overexpress *zipt-2.3* we replaced the promoter of *zipt-2.3* by using PCR to amplify 2100



458 bases upstream of the ATG start codon of *ges-1* representing the promoter, which was  
459 ligated into the plasmid containing the coding region of *zipt-2.3*, the T7 epitope, and the  
460 *unc-54* 3' UTR (30). All plasmid sequences were confirmed by standard DNA  
461 sequencing. To generate transgenic strains, we injected plasmids into N2 animals and  
462 selected animals that displayed the co-injection marker phenotype (31).

### 463 **Zinc shift assays with FluoZin-3**

464 FluoZin-3 acetoxymethyl (AM) ester (excitation 494 nm, emission 516 nm) (Molecular  
465 Probes) was reconstituted in dimethylsulfoxide (DMSO) to generate a 1mM stock  
466 solution. This solution was diluted in 5X concentrated *E. coli* OP50 to generate a final  
467 concentration of 20 $\mu$ M, which was dispensed on NAMM dishes. L4 stage  
468 hermaphrodites were cultured on these dishes supplemented with 200 $\mu$ M zinc for 16  
469 hours in the dark, and transferred to NGM dishes with no FluoZin-3 AM for 30 minutes  
470 to reduce the amount of dye within the intestinal lumen. These animals were examined  
471 for fluorescence by mounting into a 10mM sodium azide solution in M9 placed on a 2%  
472 agarose pad on a microscope slide. The animals were imaged with a Zeiss Axioplan 2  
473 microscope equipped with a FITC filter, and a Zeiss AxioCam MRm digital camera using  
474 identical settings and exposure times. The intestine on the anterior part of each animal  
475 was analyzed. Animals were then transferred to NAMM dishes with FluoZin-3 AM and 0  
476 or 100 $\mu$ M TPEN, and the fluorescence intensity (in arbitrary units) of the anterior  
477 intestines in each condition were measured using FIJI (32).

### 478 **Quantitative real-time PCR (qRT-PCR)**

479 We performed qRT-PCR as previously described with minor modifications (19). To  
480 analyze transcript levels of all 14 *zipt* genes, WT animals were cultured in excess zinc  
481 (Fig. S2). To analyze transcript levels of zinc responsive genes in WT, *zipt-2.3(lf)*, and  
482 *zipt-2.3(oe)* strains (Fig. 2), we collected mixed-stage populations of *C. elegans* by  
483 washing and cultured them for 16 hours on NAMM dishes seeded with concentrated *E.*  
484 *coli* OP50 and supplemented with 0 $\mu$ M or 40 $\mu$ M TPEN or 200 $\mu$ M zinc sulfate. Animals  
485 were collected by washing, and RNA was isolated using the TRIzol reagent (Invitrogen)  
486 and treated with DNase I. cDNAs were synthesized using the High Capacity cDNA  
487 Reverse Transcription kit according to the manufacturer's protocol (Applied

488 Biosystems). PCR was performed using an Applied Biosystems 7900 thermocycler and  
489 iTaq Universal SYBR Green Supermix (Bio-Rad). In all cases, the transcript level was  
490 normalized to the transcript level of a reference gene (*ama-1*) in the same sample. Fold  
491 change was determined by dividing the normalized transcript level at 200 $\mu$ M  
492 supplemental zinc or 40 $\mu$ M TPEN by the normalized transcript level at 0 $\mu$ M  
493 supplemental zinc or TPEN (Fig. S2).

#### 494 **Super resolution Microscopy**

495 Transgenic L4 stage animals expressing CDF-2::GFP and ZIPT-2.3::mCherry were  
496 cultured for 16 hours in LysoTracker blue on standard NAMM dishes or dishes  
497 containing 50  $\mu$ M TPEN or 200  $\mu$ M ZnSO<sub>4</sub>. Transgenic L4 stage animals expressing  
498 CDF-2::mCherry were cultured for 16-20 hours in LysoTracker Blue and the zinc dye  
499 FluoZin-3 AM. FluoZin-3 AM and LysoTracker Blue were diluted into *E. coli* OP50 to  
500 obtain a final concentration of 10  $\mu$ M and 1  $\mu$ M, respectively, and dispensed on either  
501 zinc deficient, replete, or excess dishes. Animals were anesthetized in 50  $\mu$ M NaN<sub>3</sub>,  
502 mounted on an agar pad, and sealed with a coverslip. Superresolution microscopy was  
503 performed with the Zeiss LSM 880 Confocal with Airyscan. Gut granules were selected  
504 for analysis if they displayed fluorescence from LysoTracker Blue, FluoZin-3, and CDF-  
505 2::mCherry or if they displayed fluorescence from LysoTracker Blue, ZIPT-2.3::mCherry,  
506 and CDF-2::GFP. Images of gut granules were captured in z-stack using the 60x  
507 objective. FluoZin-3 and CDF-2::GFP were detected using the 488 nm laser,  
508 LysoTracker Blue was detected using the 405 nm laser, and ZIPT-2.3::mCherry and  
509 CDF-2::mCherry were detected using the 561 nm laser. Images were deconvolved  
510 using AiryScan processing to achieve 120 nm resolution.

#### 511 **Image Analysis & Volume Calculations**

512 Post-imaging analysis was performed with Imaris software (Bitplane) and FIJI. Individual  
513 gut granules were cropped and isolated. Arbitrary colors were used for display images  
514 as follows: CDF-2::GFP and CDF-2::mCherry (red), ZIPT-2.3::mCherry (green),  
515 LysoTracker Blue (blue), and FluoZin-3 (yellow).

516 Line scan: The length of the entire granule was traced across end to end and is  
517 indicated by a dashed line. The line captures the distribution of membranes and  
518 compartment spaces over the length of the granule. Line colors corresponded to the  
519 arbitrary colors above.

520 Granule volumes: The diameter of each compartment was measured by tracing the  
521 distance across each compartment end to end three times and calculating the average  
522 value. The volume of the LysoTracker region was calculated based on the assumption  
523 that it is spherical, which appears to be true in all zinc conditions. We measured the  
524 diameter, calculated the radius as  $r_L = \frac{d}{2}$ , and calculated the volume as  $V_L = \frac{4}{3}\pi r_L^3$   
525 (Figure S5a-c). The zinc region surrounds the LysoTracker region, and the volume was  
526 calculated based on the assumption that it is a hollow sphere. We measured the  
527 diameter, calculated the radius as  $r_{Zn} = \frac{d}{2}$ , and calculated the volume as  $V_{Zn} = \frac{4}{3}\pi r_{Zn}^3 - V_L$   
528 (Figure S5a'-c'). The expansion compartment has a more complex morphology that  
529 depends on zinc conditions. In zinc replete condition, the expansion compartment  
530 surrounds the zinc region and is not inflated, and the volume was calculated based on  
531 the assumption that it is a hollow sphere. We measured the diameter, calculated the  
532 radius as  $r_{E1} = \frac{d}{2}$ , and calculated the volume as  $V_E = \frac{4}{3}\pi r_{E1}^3 - V_{Zn} - V_L$  (Figure S5b''). In  
533 zinc deficient and excess conditions, the expansion compartment is inflated, and we  
534 calculated the volume by separately determining (1) the volume of the region  
535 surrounding the acidified compartment as described above and (2) the volume of the  
536 inflated region. In zinc excess conditions, we assumed the inflated region is a sphere,  
537 measured the diameter, calculated the radius as  $r_{E2} = \frac{d}{2}$ , and calculated the volume as  
538  $V_{E2} = \frac{4}{3}\pi r_{E2}^3$ . The total volume of the expansion compartment is  $V_E = \frac{4}{3}\pi r_{E1}^3 - V_{Zn} - V_L +$   
539  $\frac{4}{3}\pi r_{E2}^3$  (Figure S5c''). In zinc deficient conditions, we assumed the inflated region is a  
540 hemisphere, measured the radius as  $r_{E2} = \frac{d}{2}$ , measured the height as  $h_{E2}$ , and  
541 calculated the volume of the hemisphere using the formula  $\pi h_{E2}^2(r_{E2} - \frac{h_{E2}}{3})$ . The total  
542 volume of the expansion compartment is  $V_E = \frac{4}{3}\pi r_{E1}^3 - V_{Zn} - V_L + \pi h_{E2}^2(r_{E2} - \frac{h_{E2}}{3})$  (Figure  
543 S5a'').

## 544 **Statistical analysis**

545 Comparisons of data were performed using the two-tailed unpaired Student's t-test, and  
546 a P value <0.05 was considered statistically significant. Correlation analysis was  
547 conducted by Pearson correlation, and a P value <0.05 was considered statistically  
548 significant. R values >0 indicate a positive correlation, R <0 indicate a negative  
549 correlation, and R=0 indicates no correlation. Correlations were first analyzed with a 1-  
550 way ANOVA; when P<0.05, data were further analyzed by a student's t-test.

## 551 **Figure legends**

552 **Figure 1. ZIPT-2.3 transports zinc from the lumen of gut granules to the**  
553 **cytoplasm.** a-a'') Diagrams show a portion of the plasmids in transgenic strains that  
554 express ZIPT-2.3::mCherry (a', *amEx348* or *amEx191*) and that overexpress *zipt-2.3* in  
555 intestinal cells (a'', *zipt-2.3(oe)*, *amEx350*). White boxes represent promoter and 3' UTR  
556 regions, black boxes and lines represent ZIPT-2.3 coding regions and introns, red and  
557 blue represent mCherry and T7 coding regions, the red line indicates the extent of the  
558 *ok2094* deletion mutation, and red triangles represent the LZA enhancer. b) Human  
559 HEK293T cells expressing ZIPT-2.3 or a vector control were incubated with varying  
560 concentrations of zinc containing a fixed fraction of radioactive <sup>65</sup>Zn. The rate of zinc  
561 uptake was determined by measuring radioactivity that accumulated in the cells. Values  
562 are mean and SE (N= 4 replicates) (\*p<0.05). c) Transgenic animals expressing CDF-  
563 2::GFP (green) and ZIPT-2.3::mCherry (red) were cultured with LysoTracker Blue in  
564 zinc replete, excess, or deficient conditions for 16 hours and visualized with confocal  
565 microscopy. Scale bars: 5 μm in larger image, and 1μm in smaller inset indicated by  
566 white box. (d-f) Wild type and *zipt-2.3(ok2094)* animals were cultured with 200μM  
567 supplemental zinc to promote zinc storage and FluoZin-3 AM to visualize labile zinc in  
568 gut granules in intestinal cells. Animals were transferred to zinc replete or zinc deficient  
569 medium (200μM TPEN), and FluoZin-3 fluorescence was analyzed by microscopy after  
570 24 and 48 hours. (d) Representative fluorescence images show a portion of the  
571 intestine; white displays FluoZin-3 fluorescence. (e,f) Quantification of fluorescence  
572 intensity: the value at time 0 was set to 1.0 arbitrary units (AU), and other values were

573 normalized. Values are the average of three biological replicates +/- S.D (\*P<0.05).  
574 (g,h) Populations of mixed-stage, wild-type, *zipt-2.3(ok2094)*, or *amEx350 [zipt-2.3(oe)]*  
575 animals were cultured in standard zinc replete conditions. RNA was analyzed by qPCR.  
576 The value for WT was set to 1.0 arbitrary units (AU) for each gene, and mutant values  
577 were normalized. Values are the average of 3 biological replicates and the standard  
578 deviation (\*P<0.05).

579 **Figure 2. ZIPT-2.3 and CDF-2 function in zinc homeostasis and are regulated**  
580 **reciprocally by zinc levels.** (a-f) L1 larvae were cultured on NAMM dishes containing  
581 the zinc chelator TPEN, the iron chelator 2,2'-bipyridyl, or supplemental zinc for three  
582 days, and the length of individual worms was measured. Values represent the average  
583 length +/- standard deviation (3 independent biological replicates, each with a minimum  
584 of twenty animals, \*p<0.05). Genotypes: *zipt-2.3(ok2094)*, *amEx350 [zipt-2.3(oe)]*, *cdf-*  
585 *2(tm788)*, *glo-1(zu391)*, and wild type. (g-i) L1 larvae were cultured on NAMM dishes  
586 containing 0 or 25µM (+Zn) supplemental zinc for 16 hours, shifted to NAMM dishes  
587 containing TPEN for three days, and analyzed for length. (j) A population of mixed-  
588 stage, wild-type animals were cultured with 200 µM supplemental zinc (zinc excess), 40  
589 µM TPEN (zinc deficient), or 0µM supplemental zinc or TPEN (zinc replete) for 16  
590 hours. RNA was analyzed by qPCR. The value in zinc replete conditions was set equal  
591 to 1.0 arbitrary units (AU), and other values normalized. Average of 3 biological  
592 replicates +/- standard deviation. (k) Transgenic L4 stage larvae expressing CDF-  
593 2::GFP and ZIPT-2.3::mCherry were cultured with 50 µM TPEN or 200 µM  
594 supplemental zinc for 16 hours. Representative images show one worm with bright field  
595 (BF, upper), green fluorescence (middle), or red fluorescence (lower). Scale bar = 10  
596 µm.

597 **Figure 3. Super resolution microscopy reveals that gut granules have an acidified**  
598 **and an expansion compartment** (a) Transgenic L4 stage animals expressing CDF-  
599 2::GFP (true color green – arbitrary color red) and ZIPT-2.3::mCherry (true color red –  
600 arbitrary color green) were cultured for 16 hours in LysoTracker Blue (true color blue –  
601 arbitrary color blue) in either standard medium (Zn replete), 50 µM TPEN (Zn deficient)  
602 or 200 µM supplemental zinc (Zn excess). Individual gut granules were imaged by super

603 resolution microscopy for green, red, and blue fluorescence, and a maximum intensity  
604 projection is displayed. Scale bar = 0.5  $\mu\text{m}$ . (b-d) A line scan was performed, indicated  
605 by the dashed white line on merge image. For each color, the highest value was set  
606 equal to 1.0 arbitrary units (AU), and other values were normalized. (c') Enlargements of  
607 specific regions indicated by black double-sided arrows. Annotations above indicate  
608 positions of membranes (triangles), compartments (purple and gray rectangles) and  
609 regions (blue and orange rectangles). (e-h) Transgenic L4 stage animals expressing  
610 CDF-2::mCherry (true color red – arbitrary color red) were cultured for 16-20 hours in  
611 LysoTracker blue (true color blue – arbitrary color blue) and the zinc dye FluoZin-3 AM  
612 (true color green – arbitrary color yellow). Culture conditions, imaging, and line scan  
613 analysis were similar to panel a-d. (i) Merge images of gut granules from animals  
614 cultured in zinc excess as in panel e illustrate volume variation (white number). Scale  
615 bar = 0.5  $\mu\text{m}$  (j) Model of a gut granule in zinc excess conditions. Compartments,  
616 regions, and membranes are labeled. CDF-2 and ZIPT-2.3 proteins are black/white or  
617 pink arrows, respectively. (k) Volumes of the expansion compartment, zinc region, and  
618 LysoTracker region were calculated for gut granules from animals analyzed as in panel  
619 e. Values are average  $\pm$  S.D., and percent is the fraction of the total volume. N=11  
620 deficient, 12 replete, and 11 excess.

621

622 **Figure 4. Vesicle fusion enlarges the expansion compartment and delivers CDF-2**  
623 **and ZIPT-2.3 in zinc excess and deficient conditions, respectively.** (a) Model of the  
624 morphological transition of gut granules and changes in transporter levels during the  
625 shift from zinc replete to zinc excess or deficient conditions. (b) Model of zinc  
626 homeostasis in zinc deficient, replete, and excess conditions. HIZR-1 and the HZA  
627 enhancer regulate expression of *cdf-2*; an undefined system for sensing low zinc and  
628 the LZA enhancer regulate expression of *zipt-2.3*. mRNA is translated in the ER, and  
629 Golgi-derived vesicles deliver CDF-2 and ZIPT-2.3 protein to gut granules, enlarging the  
630 expansion compartment in zinc excess and deficient conditions. (c) Transgenic L4 stage  
631 animals expressing CDF-2::GFP (true color green – arbitrary color red) and ZIPT-  
632 2.3::mCherry (true color red – arbitrary color green) were cultured for 16 hours in

633 LysoTracker Blue (true color blue – arbitrary color blue) in either 50  $\mu$ M TPEN (Zn  
634 deficient) or 200  $\mu$ M supplemental zinc (Zn excess). Individual gut granules were  
635 imaged by super resolution microscopy for green, red, and blue fluorescence – these  
636 images are a three-color merge. Scale bar = 0.5  $\mu$ m. White arrows indicate vesicles that  
637 contain CDF-2 and appear to be fusing with the expansion compartment membrane.

638 **Supplemental Figure 1 (with main Fig. 2). *zipt-2.3(lf)* hypersensitivity to zinc**  
639 **deficient conditions, and *zipt-2.3* transcriptional repression in zinc excess**  
640 **conditions were not displayed by other *zipt* genes.** (a-h) Animals were synchronized  
641 at the L1 larval stage and cultured for three days on standard NAMM dishes or dishes  
642 supplemented with the zinc chelator TPEN or the manganese chelator DCTA. Length of  
643 individual worms was measured using microscopy to capture images and ImageJ  
644 software for analysis. Values represent the average length +/- standard deviation (3  
645 independent biological replicates, each with a minimum of twenty animals, \*P<0.05).  
646 Genotypes were wild type, *zipt-2.3(ok2094) II*, *zipt-2.4(ok2221) I*, *zipt-7.1(ok971) IV*,  
647 *zipt-9(ok876) V*, *zipt-15(ok2160) IV*, *zipt-16(ok875) V*, and *zipt-17(ok745) IV*. Panel a is  
648 identical to Figure 2a and is shown here to facilitate comparisons. (i) Wild-type animals  
649 were cultured with 0 or 200  $\mu$ M supplemental zinc for 16 hours, and mRNA levels were  
650 analyzed by qPCR for all 14 *C. elegans zipt* genes. Values are the ratio of mRNA levels  
651 at 200 $\mu$ M supplemental zinc/0 $\mu$ M supplemental zinc, an indication of transcriptional  
652 regulation by high zinc. Average of 3 biological replicates +/- standard deviation  
653 (\*P<0.05). Only *zipt-2.3* mRNA levels were significantly reduced in excess zinc,  
654 indicating this is a specific regulatory response.

655 **Supplemental Figure 2 (with main Fig. 1). ZIPT-2.3 is a conserved zinc transporter.**  
656 (a) The diagram shows a portion of a plasmid in transgenic strains that express CDF-  
657 2::GFP (*amlS4*). White boxes represent promoter and 3' UTR regions, black boxes and  
658 lines represent CDF-2 coding regions and introns, green represents the GFP coding  
659 region, and the green triangle represents the HZA enhancer. (b) An alignment of the  
660 predicted *C. elegans* ZIPT-2.3, *D. melanogaster* ZIP1, human ZIP2, and *D. rerio* ZIP1  
661 proteins. Identical and similar amino acids are highlighted in black and grey,  
662 respectively. (c) Model of the ZIPT-2.3 transporter (pink bars), a predicted

663 transmembrane protein, in a lipid bilayer (blue). ZIPT-2.3 transports zinc (green circles)  
664 from the acidified compartment of gut granules to the cytoplasm (pink arrow). (d) Wild-  
665 type, *zipt-2.3(ok2094)*, and *zipt-2.3(ok2094);zipt-2.3p::ZIPT-2.3::mCherry (amEx348)*  
666 animals were synchronized at the L1 larval stage and cultured for three days on  
667 standard NAMM dishes (zinc replete) or dishes supplemented with 50  $\mu$ M TPEN (zinc  
668 deficient). Length of individual worms was measured using microscopy to capture  
669 images and ImageJ software for analysis. Values represent the average length +/-  
670 standard error (3 independent biological replicates, and each replicate included a  
671 minimum of twenty animals, \* $p < 0.05$ , \*\* $p < 0.01$ , \*\*\* $p < 0.001$ ). *zipt-2.3(ok2094)* animals  
672 displayed significantly reduced growth in zinc deficient conditions, and this defect was  
673 rescued by expression of the ZIPT-2.3::mCherry protein, indicating this fusion protein is  
674 functional *in vivo*.

### 675 **Supplemental Figure 3 (with main Fig. 3a-d). Analysis of super resolution**

676 **microscopy images using line scans.** Transgenic L4 stage animals expressing CDF-  
677 2::GFP (true color green – arbitrary color red) and ZIPT-2.3::mCherry (true color red –  
678 arbitrary color green) were cultured for 16 hours in LysoTracker Blue (true color blue –  
679 arbitrary color blue) in either standard medium (Zn replete), 50  $\mu$ M TPEN (Zn deficient)  
680 or 200  $\mu$ M supplemental zinc (Zn excess). Individual gut granules were imaged by super  
681 resolution microscopy for green, red, and blue fluorescence. (a-c) Images display a  
682 three-color merge of a maximum intensity projection. A line scan was performed  
683 (dashed white line on merge image). Yellow boxes labeled 1-3 indicate sections of the  
684 line scan that cross membranes. (a'-c') For each color in the line scan, the highest value  
685 was set equal to 1.0 arbitrary units (AU), and other values were normalized. Annotations  
686 above indicate positions of membranes (triangles) and compartments (purple and gray  
687 rectangles). Yellow boxes correspond to the images above and cartoons below. The  
688 same images and line scans are shown in Figure 3a-d. (a''-c'') Cartoons of lysosome-  
689 related organelles. The expansion compartment space is gray and the membrane is a  
690 red line. The acidified compartment space is blue and the membrane is a blue line. The  
691 dashed black line indicates the line scan, and yellow boxes correspond to the images  
692 above.



693 **Supplemental Figure 4 (with main Fig. 3e-h). Analysis of super resolution**  
694 **microscopy images using line scans.**

695 Transgenic L4 stage animals expressing CDF-2::mCherry (true color red – arbitrary  
696 color red) were cultured for 16-20 hours in LysoTracker blue (true color blue – arbitrary  
697 color blue) and the zinc dye FluoZin-3 AM (true color green – arbitrary color yellow) in  
698 either standard medium (Zn replete), 50  $\mu$ M TPEN (Zn deficient) or 200  $\mu$ M  
699 supplemental zinc (Zn excess). Individual gut granules were imaged by super resolution  
700 microscopy for green, red, and blue fluorescence. (a-c) Images display a three-color  
701 merge of a maximum intensity projection. A line scan was performed (dashed white line  
702 on merge image). Yellow boxes labeled 1-3 indicate sections of the line scan that cross  
703 membranes. (a'-c') For each color in the line scan, the highest value was set equal to  
704 1.0 arbitrary units (AU), and other values were normalized. Annotations above indicate  
705 positions of membranes (triangles), compartments (purple and gray rectangles), and  
706 regions (blue and orange rectangles). Yellow boxes correspond to the images above  
707 and cartoons below. The same images and line scans are shown in Figure 3e-h. (a''-c'')

708 Cartoons of lysosome-related organelles. The expansion compartment space is gray,  
709 and the membrane is a red line. The acidified compartment space is blue for the  
710 LysoTracker region and orange for the zinc region, and the membrane is a blue line.  
711 The dashed black line indicates the line scan, and yellow boxes correspond to the  
712 images above.

713 **Supplemental Figure 5 (with main Fig. 3e). Methods for calculating the volumes of**  
714 **the LysoTracker region, zinc region, and expansion compartment in zinc**  
715 **deficient, replete, and excess conditions.** We developed mathematical equations to  
716 calculate the volumes of the LysoTracker region and the zinc region, which together  
717 comprise the acidified compartment, and the volume of the expansion compartment. (a-  
718 c) The LysoTracker region appears spherical in all conditions, and we used the same  
719 approach to calculate the volume ( $V_L$ ) in all conditions. We assumed it is a sphere,  
720 measured the diameter, calculated the radius ( $r_L$ ), and calculated the volume using the  
721 formula  $V_L = 4/3\pi r_L^3$  (a'-c'). The zinc region appears to be a hollow sphere in all  
722 conditions, and we used the same approach to calculate the volume ( $V_{Zn}$ ) in all

723 conditions. We assumed it is a sphere, measured the diameter, calculated the radius  
724 ( $r_{Zn}$ ), and calculated the volume using the formula  $V_{Zn} = 4/3\pi r_{Zn}^3$ , and then subtracted  
725 the volume of the LysoTracker region ( $V_L$ ). The sum of the volumes of the LysoTracker  
726 region and zinc region is the volume of the acidified compartment ( $V_A = V_L + V_{Zn}$ ) ( $a'' -$   
727  $c''$ ). The expansion compartment displayed a distinct shape in each zinc condition, and  
728 we developed a unique formula for each condition. In zinc deficient conditions, we  
729 measured the expansion compartment volume by assuming it has two parts: (1) a  
730 hollow sphere surrounding the zinc region and (2) a hemispherical attachment. To  
731 calculate the total volume ( $V_E$ ), we independently measured the two parts. For part 1,  
732 we assumed it is a sphere, measured the diameter, calculated the radius ( $r_{E1}$ ), and  
733 calculated the volume using the formula  $V = 4/3 \pi r_{E1}^3$ , and then subtracted the volumes  
734 of the LysoTracker region ( $V_L$ ) and the zinc region ( $V_Z$ ). For part 2, we assumed it is a  
735 hemisphere, measured the radius ( $r_{E2}$ ) and the thickness ( $h_{E2}$ ), and used the formula,  
736  $\pi h_{E2}^2 (r_{E2} - \frac{h_{E2}}{3})$ . The total volume of the expansion compartment ( $V_E$ ) is the sum of the  
737 volumes of part 1 and part 2. In zinc replete conditions, we measured the expansion  
738 compartment volume by assuming it has one part - a hollow sphere surrounding the  
739 zinc region. We assumed it is a sphere, measured the diameter, calculated the radius  
740 ( $r_{E1}$ ), and calculated the volume using the formula  $V = 4/3 \pi r_{E1}^3$ , and then subtracted the  
741 volumes of the LysoTracker region ( $V_L$ ) and the zinc region ( $V_Z$ ). In zinc excess  
742 conditions, we measured the expansion compartment volume by assuming it has two  
743 parts: (1) a hollow sphere surrounding the zinc region and (2) a spherical attachment.  
744 To calculate the total volume ( $V_E$ ), we independently measured the two parts. For part  
745 1, we assumed it is a sphere, measured the diameter, calculated the radius ( $r_{E1}$ ), and  
746 calculated the volume using the formula  $V = 4/3\pi r_{E1}^3$ , and then subtracted the volumes  
747 of the LysoTracker region ( $V_L$ ) and the zinc region ( $V_Z$ ). For part 2, we assumed it is a  
748 sphere, measured the diameter, calculated the radius ( $r_{E2}$ ), and calculated the volume  
749 using the formula  $V = 4/3\pi r_{E2}^3$ . The total volume of the expansion compartment ( $V_E$ ) is  
750 the sum of the volumes of part 1 and part 2.

751 **Supplemental Figure 6 (with main Fig. 3a,b). Super resolution microscopy of gut**  
752 **granules in zinc deficient conditions with CDF-2, ZIPT-2.3 and LysoTracker.**

753 Transgenic L4 stage animals expressing CDF-2::GFP (true color green – arbitrary color  
754 red) and ZIPT-2.3::mCherry (true color red – arbitrary color green) were cultured for 16  
755 hours in LysoTracker Blue (true color blue – arbitrary color blue) in 50  $\mu$ M TPEN (Zn  
756 deficient). Individual gut granules were imaged by super resolution microscopy for  
757 green, red, and blue fluorescence, and a maximum intensity projection is displayed.  
758 Scale bar = 0.5  $\mu$ m. (1'-2') A line scan was performed, indicated by the dashed white  
759 line on merge image. For each color, the highest value was set equal to 1.0 arbitrary  
760 units (AU), and other values were normalized. (1''-2'') Enlargements of specific regions  
761 indicated by black lines. Annotations above indicate positions of membranes (triangles)  
762 and compartments (purple and gray rectangles).

763 **Supplemental Figure 7 (with main Fig. 3a,c). Super resolution microscopy of gut**  
764 **granules in zinc replete conditions with CDF-2, ZIPT-2.3 and LysoTracker.**

765 Transgenic L4 stage animals expressing CDF-2::GFP (true color green – arbitrary color  
766 red) and ZIPT-2.3::mCherry (true color red – arbitrary color green) were cultured for 16  
767 hours in LysoTracker Blue (true color blue – arbitrary color blue) in standard medium  
768 (Zn replete). Individual gut granules were imaged by super resolution microscopy for  
769 green, red, and blue fluorescence, and a maximum intensity projection is displayed.  
770 Scale bar = 0.5  $\mu$ m. (1'-12') A line scan was performed, indicated by the dashed white  
771 line on merge image. For each color, the highest value was set equal to 1.0 arbitrary  
772 units (AU), and other values were normalized. (1''-12'') Enlargements of specific regions  
773 indicated by black lines. Annotations above indicate positions of membranes (triangles)  
774 and compartments (purple and gray rectangles).

775 **Supplemental Figure 8 (with main Fig. 3a, d). Super resolution microscopy of gut**  
776 **granules in zinc excess conditions with CDF-2, ZIPT-2.3 and LysoTracker.**

777 Transgenic L4 stage animals expressing CDF-2::GFP (true color green – arbitrary color  
778 red) and ZIPT-2.3::mCherry (true color red – arbitrary color green) were cultured for 16  
779 hours in LysoTracker Blue (true color blue – arbitrary color blue) in medium with 200  $\mu$ M  
780 supplemental zinc (Zn excess). Individual gut granules were imaged by super resolution  
781 microscopy for green, red, and blue fluorescence, and a maximum intensity projection is  
782 displayed. Scale bar = 0.5  $\mu$ m. (1'-11') A line scan was performed, indicated by the

783 dashed white line on merge image. For each color, the highest value was set equal to  
784 1.0 arbitrary units (AU), and other values were normalized. (1''-11'') Enlargements of  
785 specific regions indicated by black lines. Annotations above indicate positions of  
786 membranes (triangles) and compartments (purple and gray rectangles).

787 **Supplemental Figure 9 (with main Fig. 3e, f). Super resolution microscopy of gut**  
788 **granules in zinc deficient conditions with CDF-2, FluoZin-3 AM, and LysoTracker.**

789 Transgenic L4 stage animals expressing CDF-2::mCherry (true color red – arbitrary  
790 color red) were cultured for 16-20 hours in LysoTracker blue (true color blue – arbitrary  
791 color blue) and the zinc dye FluoZin-3 AM (true color green – arbitrary color yellow) in  
792 medium containing 50  $\mu$ M TPEN (Zn deficient). Individual gut granules were imaged by  
793 super resolution microscopy for green, red, and blue fluorescence, and a maximum  
794 intensity projection is displayed. Scale bar = 0.5  $\mu$ m. (1'-10') A line scan was performed,  
795 indicated by the dashed white line on merge image. For each color, the highest value  
796 was set equal to 1.0 arbitrary units (AU), and other values were normalized. (1''-10'')  
797 Enlargements of specific regions indicated by black lines. Annotations above indicate  
798 positions of membranes (triangles), compartments (purple and gray rectangles) and  
799 regions (blue and orange rectangles). Gut granules were measured to determine the  
800 volume of the expansion compartment (EC), zinc region (ZR), and LysoTracker region  
801 (LR). Percent is the fraction of the total volume.

802

803 **Supplemental Figure 10 (with main Fig. 3e, g). Super resolution microscopy of gut**  
804 **granules in zinc replete conditions with CDF-2, FluoZin-3 AM, and LysoTracker.**

805 Transgenic L4 stage animals expressing CDF-2::mCherry (true color red – arbitrary  
806 color red) were cultured for 16-20 hours in LysoTracker blue (true color blue – arbitrary  
807 color blue) and the zinc dye FluoZin-3 AM (true color green – arbitrary color yellow) in  
808 standard medium (Zn replete). Individual gut granules were imaged by super resolution  
809 microscopy for green, red, and blue fluorescence, and a maximum intensity projection is  
810 displayed. Scale bar = 0.5  $\mu$ m. (1'-11')

811

812 **Supplemental Figure 11 (with main Fig. 3eh). Super resolution microscopy of gut**  
813 **granules in zinc excess conditions with CDF-2, FluoZin-3, and LysoTracker.**

814 Transgenic L4 stage animals expressing CDF-2::mCherry (true color red – arbitrary  
815 color red) were cultured for 16-20 hours in LysoTracker blue (true color blue – arbitrary  
816 color blue) and the zinc dye FluoZin-3 AM (true color green – arbitrary color yellow) in  
817 medium containing 200  $\mu\text{M}$  supplemental zinc (Zn excess). Individual gut granules were  
818 imaged by super resolution microscopy for green, red, and blue fluorescence, and a  
819 maximum intensity projection is displayed. Scale bar = 0.5  $\mu\text{m}$ . (1'-11') A line scan was  
820 performed, indicated by the dashed white line on merge image. For each color, the  
821 highest value was set equal to 1.0 arbitrary units (AU), and other values were  
822 normalized. Enlargements of specific regions indicated by black lines. Annotations  
823 above indicate positions of membranes (triangles) and compartments (purple and gray  
824 rectangles). Gut granules were measured to determine the volume of the expansion  
825 compartment (EC), zinc region (ZR), and LysoTracker region (LR). Percent is the  
826 fraction of the total volume.

827 **Supplemental Figure 12 (with main Fig. 3e,k). Volumes of the LysoTracker region,**  
828 **zinc region, and expansion compartment in zinc deficient, replete, and excess**  
829 **conditions.** Transgenic L4 stage animals expressing CDF-2::mCherry were cultured for  
830 16-20 hours in LysoTracker blue and the zinc dye FluoZin-3 AM in either standard  
831 medium (Zn replete), 50  $\mu\text{M}$  TPEN (Zn deficient) or 200  $\mu\text{M}$  supplemental zinc (Zn  
832 excess). Individual gut granules were imaged by super resolution microscopy for green,  
833 red, and blue fluorescence. The volumes of the LysoTracker region, zinc region, and  
834 expansion compartment were measured (Fig. S5). (a-b) Bars represent the average  
835 volume ( $\mu\text{m}^3$ ) or the average percent of the total volume (%) of the zinc region (orange),  
836 LysoTracker region (blue), and expansion compartment (gray). N=11 deficient, 12  
837 replete, and 11 excess. (c-i). Comparison of absolute volumes ( $\mu\text{m}^3$ ) or percentage of  
838 total volumes of the expansion compartment (c,d), LysoTracker region (e,f), zinc region  
839 (g,h), or total volume (i) in zinc deficient, replete, and excess conditions. Points are data  
840 from one organelle, and bar and whiskers indicate mean and standard error (\*  $p < 0.05$ ,  
841 \*\*  $p < 0.001$ , \*\*\*  $p < 0.0001$ ).

842 **Supplemental Figure 13 (with main Fig. 3e,k). Correlations between volumes of**  
843 **the LysoTracker region, zinc region, expansion compartment, and total volume in**  
844 **zinc deficient, replete, and excess conditions.** Transgenic L4 stage animals  
845 expressing CDF-2::mCherry were cultured for 16-20 hours in LysoTracker blue and the  
846 zinc dye FluoZin-3 AM in either standard medium (Zn replete), 50  $\mu$ M TPEN (Zn  
847 deficient) or 200  $\mu$ M supplemental zinc (Zn excess). Individual gut granules were  
848 imaged by super resolution microscopy for green, red, and blue fluorescence. The  
849 volumes of the LysoTracker region, zinc region, and expansion compartment were  
850 measured (Fig. S5). (a-c) Data points represent the expansion compartment volume  
851 and the total volume of one gut granule. R is the correlation coefficient, where 1.0 is a  
852 perfect positive correlation, 0 is no correlation, and -1.0 is a perfect negative correlation.  
853 P is the likelihood that R is significantly different from 0 (\*  $p < 0.05$ , \*\*  $p < 0.001$ , \*\*\*  
854  $p < 0.0001$ ). There was a significant positive correlation in zinc excess and deficient  
855 conditions but not in zinc replete conditions. (d-f) Data points represent the LysoTracker  
856 region volume and the total volume of one gut granule. There was a significant positive  
857 correlation in all zinc conditions. (g-i) Data points represent the zinc region volume and  
858 the total volume of one gut granule. There was no significant correlation in any zinc  
859 condition.

860

## 861 **References**

- 862 1. Andreini C, Banci L, Bertini I, Rosato A. Counting the zinc-proteins encoded in  
863 the human genome. *J Proteome Res.* 2006;5(1):196-201. Epub 2006/01/07. doi:  
864 10.1021/pr050361j. PubMed PMID: 16396512.
- 865 2. Maret W. Zinc in Cellular Regulation: The Nature and Significance of "Zinc  
866 Signals". *Int J Mol Sci.* 2017;18(11). Epub 2017/11/01. doi: 10.3390/ijms18112285.  
867 PubMed PMID: 29088067; PMCID: PMC5713255.
- 868 3. Qin Y, Dittmer PJ, Park JG, Jansen KB, Palmer AE. Measuring steady-state and  
869 dynamic endoplasmic reticulum and Golgi Zn<sup>2+</sup> with genetically encoded sensors. *Proc*  
870 *Natl Acad Sci U S A.* 2011;108(18):7351-6. Epub 2011/04/20. doi:  
871 10.1073/pnas.1015686108. PubMed PMID: 21502528; PMCID: PMC3088641.
- 872 4. Vinkenborg JL, Nicolson TJ, Bellomo EA, Koay MS, Rutter GA, Merx M.  
873 Genetically encoded FRET sensors to monitor intracellular Zn<sup>2+</sup> homeostasis. *Nat*  
874 *Methods.* 2009;6(10):737-40. Epub 2009/09/01. doi: 10.1038/nmeth.1368. PubMed  
875 PMID: 19718032; PMCID: PMC6101214.

- 876 5. Lichten LA, Cousins RJ. Mammalian zinc transporters: nutritional and physiologic  
877 regulation. *Annu Rev Nutr.* 2009;29:153-76. Epub 2009/04/30. doi: 10.1146/annurev-  
878 nutr-033009-083312. PubMed PMID: 19400752.
- 879 6. Kambe T, Tsuji T, Hashimoto A, Itsumura N. The Physiological, Biochemical, and  
880 Molecular Roles of Zinc Transporters in Zinc Homeostasis and Metabolism. *Physiol*  
881 *Rev.* 2015;95(3):749-84. Epub 2015/06/19. doi: 10.1152/physrev.00035.2014. PubMed  
882 PMID: 26084690.
- 883 7. Kimura T, Kambe T. The Functions of Metallothionein and ZIP and ZnT  
884 Transporters: An Overview and Perspective. *Int J Mol Sci.* 2016;17(3):336. Epub  
885 2016/03/10. doi: 10.3390/ijms17030336. PubMed PMID: 26959009; PMCID:  
886 PMC4813198.
- 887 8. Conklin DS, McMaster JA, Culbertson MR, Kung C. COT1, a gene involved in  
888 cobalt accumulation in *Saccharomyces cerevisiae*. *Mol Cell Biol.* 1992;12(9):3678-88.  
889 Epub 1992/09/01. doi: 10.1128/mcb.12.9.3678. PubMed PMID: 1508175; PMCID:  
890 PMC360222.
- 891 9. MacDiarmid CW, Gaither LA, Eide D. Zinc transporters that regulate vacuolar  
892 zinc storage in *Saccharomyces cerevisiae*. *EMBO J.* 2000;19(12):2845-55. Epub  
893 2000/06/17. doi: 10.1093/emboj/19.12.2845. PubMed PMID: 10856230; PMCID:  
894 PMC203372.
- 895 10. Docampo R, de Souza W, Miranda K, Rohloff P, Moreno SN. Acidocalcisomes -  
896 conserved from bacteria to man. *Nat Rev Microbiol.* 2005;3(3):251-61. Epub  
897 2005/03/02. doi: 10.1038/nrmicro1097. PubMed PMID: 15738951.
- 898 11. Palmiter RD, Cole TB, Findley SD. ZnT-2, a mammalian protein that confers  
899 resistance to zinc by facilitating vesicular sequestration. *EMBO J.* 1996;15(8):1784-91.  
900 Epub 1996/04/15. PubMed PMID: 8617223; PMCID: PMC450094.
- 901 12. Roh HC, Collier S, Guthrie J, Robertson JD, Kornfeld K. Lysosome-related  
902 organelles in intestinal cells are a zinc storage site in *C. elegans*. *Cell Metab.*  
903 2012;15(1):88-99. Epub 2012/01/10. doi: 10.1016/j.cmet.2011.12.003. PubMed PMID:  
904 22225878; PMCID: PMC4026189.
- 905 13. Dietrich N, Schneider DL, Kornfeld K. A pathway for low zinc homeostasis that is  
906 conserved in animals and acts in parallel to the pathway for high zinc homeostasis.  
907 *Nucleic Acids Res.* 2017;45(20):11658-72. Epub 2017/10/05. doi: 10.1093/nar/gkx762.  
908 PubMed PMID: 28977437; PMCID: PMC5714235.
- 909 14. Zhao Y, Tan CH, Krauchunas A, Scharf A, Dietrich N, Warnhoff K, Yuan Z,  
910 Druzhinina M, Gu SG, Miao L, Singson A, Ellis RE, Kornfeld K. The zinc transporter  
911 ZIPT-7.1 regulates sperm activation in nematodes. *PLoS Biol.* 2018;16(6):e2005069.  
912 Epub 2018/06/08. doi: 10.1371/journal.pbio.2005069. PubMed PMID: 29879108;  
913 PMCID: PMC5991658.
- 914 15. Yin S, Qin Q, Zhou B. Functional studies of *Drosophila* zinc transporters reveal  
915 the mechanism for zinc excretion in Malpighian tubules. *BMC Biol.* 2017;15(1):12. Epub  
916 2017/02/16. doi: 10.1186/s12915-017-0355-9. PubMed PMID: 28196538; PMCID:  
917 PMC5309981.
- 918 16. Qiu A, Shayeghi M, Hogstrand C. Molecular cloning and functional  
919 characterization of a high-affinity zinc importer (DrZIP1) from zebrafish (*Danio rerio*).  
920 *Biochem J.* 2005;388(Pt 3):745-54. Epub 2005/02/03. doi: 10.1042/BJ20041807.  
921 PubMed PMID: 15683366; PMCID: PMC1183453.

- 922 17. Dempski RE. The cation selectivity of the ZIP transporters. *Curr Top Membr.*  
923 2012;69:221-45. Epub 2012/10/11. doi: 10.1016/B978-0-12-394390-3.00009-4. PubMed  
924 PMID: 23046653.
- 925 18. Chapman EM, Lant B, Ohashi Y, Yu B, Schertzberg M, Go C, Dogra D,  
926 Koskimaki J, Girard R, Li Y, Fraser AG, Awad IA, Abdelilah-Seyfried S, Gingras AC,  
927 Derry WB. A conserved CCM complex promotes apoptosis non-autonomously by  
928 regulating zinc homeostasis. *Nat Commun.* 2019;10(1):1791. Epub 2019/04/19. doi:  
929 10.1038/s41467-019-09829-z. PubMed PMID: 30996251; PMCID: PMC6470173.
- 930 19. Davis DE, Roh HC, Deshmukh K, Bruinsma JJ, Schneider DL, Guthrie J,  
931 Robertson JD, Kornfeld K. The cation diffusion facilitator gene *cdf-2* mediates zinc  
932 metabolism in *Caenorhabditis elegans*. *Genetics.* 2009;182(4):1015-33. Epub  
933 2009/05/19. doi: 10.1534/genetics.109.103614. PubMed PMID: 19448268; PMCID:  
934 PMC2728845.
- 935 20. Moilanen LH, Fukushige T, Freedman JH. Regulation of metallothionein gene  
936 transcription. Identification of upstream regulatory elements and transcription factors  
937 responsible for cell-specific expression of the metallothionein genes from  
938 *Caenorhabditis elegans*. *J Biol Chem.* 1999;274(42):29655-65. Epub 1999/10/09. doi:  
939 10.1074/jbc.274.42.29655. PubMed PMID: 10514435.
- 940 21. Hermann GJ, Schroeder LK, Hieb CA, Kershner AM, Rabbitts BM, Fonarev P,  
941 Grant BD, Priess JR. Genetic analysis of lysosomal trafficking in *Caenorhabditis*  
942 *elegans*. *Mol Biol Cell.* 2005;16(7):3273-88. Epub 2005/04/22. doi: 10.1091/mbc.e05-  
943 01-0060. PubMed PMID: 15843430; PMCID: PMC1165410.
- 944 22. Chazotte B. Labeling lysosomes in live cells with LysoTracker. *Cold Spring Harb*  
945 *Protoc.* 2011;2011(2):pdb prot5571. Epub 2011/02/03. doi: 10.1101/pdb.prot5571.  
946 PubMed PMID: 21285271.
- 947 23. Warnhoff K, Roh HC, Kocsisova Z, Tan CH, Morrison A, Croswell D, Schneider  
948 DL, Kornfeld K. The Nuclear Receptor HIZR-1 Uses Zinc as a Ligand to Mediate  
949 Homeostasis in Response to High Zinc. *PLoS Biol.* 2017;15(1):e2000094. Epub  
950 2017/01/18. doi: 10.1371/journal.pbio.2000094. PubMed PMID: 28095401; PMCID:  
951 PMC5240932.
- 952 24. Aydemir TB, Liuzzi JP, McClellan S, Cousins RJ. Zinc transporter ZIP8  
953 (SLC39A8) and zinc influence IFN-gamma expression in activated human T cells. *J*  
954 *Leukoc Biol.* 2009;86(2):337-48. Epub 2009/04/30. doi: 10.1189/jlb.1208759. PubMed  
955 PMID: 19401385; PMCID: PMC2726764.
- 956 25. Fukada T, Civic N, Furuichi T, Shimoda S, Mishima K, Higashiyama H, Idaira Y,  
957 Asada Y, Kitamura H, Yamasaki S, Hojyo S, Nakayama M, Ohara O, Koseki H, Dos  
958 Santos HG, Bonafe L, Ha-Vinh R, Zankl A, Unger S, Kraenzlin ME, Beckmann JS, Saito  
959 I, Rivolta C, Ikegawa S, Superti-Furga A, Hirano T. The zinc transporter  
960 SLC39A13/ZIP13 is required for connective tissue development; its involvement in  
961 BMP/TGF-beta signaling pathways. *PLoS One.* 2008;3(11):e3642. Epub 2008/11/06.  
962 doi: 10.1371/journal.pone.0003642. PubMed PMID: 18985159; PMCID: PMC2575416.
- 963 26. Jeong J, Walker JM, Wang F, Park JG, Palmer AE, Giunta C, Rohrbach M,  
964 Steinmann B, Eide DJ. Promotion of vesicular zinc efflux by ZIP13 and its implications  
965 for spondylocheiro dysplastic Ehlers-Danlos syndrome. *Proc Natl Acad Sci U S A.*  
966 2012;109(51):E3530-8. Epub 2012/12/06. doi: 10.1073/pnas.1211775110. PubMed  
967 PMID: 23213233; PMCID: PMC3529093.



- 968 27. Amiri K, Kalish, A, Mukherji, S. Robustness and universality in organelle size  
969 control. bioRxiv. 2021;789453. doi: <https://doi.org/10.1101/789453>.
- 970 28. Brenner S. The genetics of *Caenorhabditis elegans*. *Genetics*. 1974;77(1):71-94.  
971 Epub 1974/05/01. PubMed PMID: 4366476; PMCID: PMC1213120.
- 972 29. Consortium CeDM. large-scale screening for targeted knockouts in the  
973 *Caenorhabditis elegans* genome. *G3 (Bethesda)*. 2012;2(11):1415-25. Epub  
974 2012/11/23. doi: 10.1534/g3.112.003830. PubMed PMID: 23173093; PMCID:  
975 PMC3484672.
- 976 30. Egan CR, Chung MA, Allen FL, Heschl MF, Van Buskirk CL, McGhee JD. A gut-  
977 to-pharynx/tail switch in embryonic expression of the *Caenorhabditis elegans* ges-1  
978 gene centers on two GATA sequences. *Dev Biol*. 1995;170(2):397-419. Epub  
979 1995/08/01. doi: 10.1006/dbio.1995.1225. PubMed PMID: 7649372.
- 980 31. Mello CC, Kramer JM, Stinchcomb D, Ambros V. Efficient gene transfer in  
981 *C.elegans*: extrachromosomal maintenance and integration of transforming sequences.  
982 *EMBO J*. 1991;10(12):3959-70. Epub 1991/12/01. PubMed PMID: 1935914; PMCID:  
983 PMC453137.
- 984 32. Schindelin J, Arganda-Carreras I, Frise E, Kaynig V, Longair M, Pietzsch T,  
985 Preibisch S, Rueden C, Saalfeld S, Schmid B, Tinevez JY, White DJ, Hartenstein V,  
986 Eliceiri K, Tomancak P, Cardona A. Fiji: an open-source platform for biological-image  
987 analysis. *Nat Methods*. 2012;9(7):676-82. Epub 2012/06/30. doi: 10.1038/nmeth.2019.  
988 PubMed PMID: 22743772; PMCID: PMC3855844.
- 989

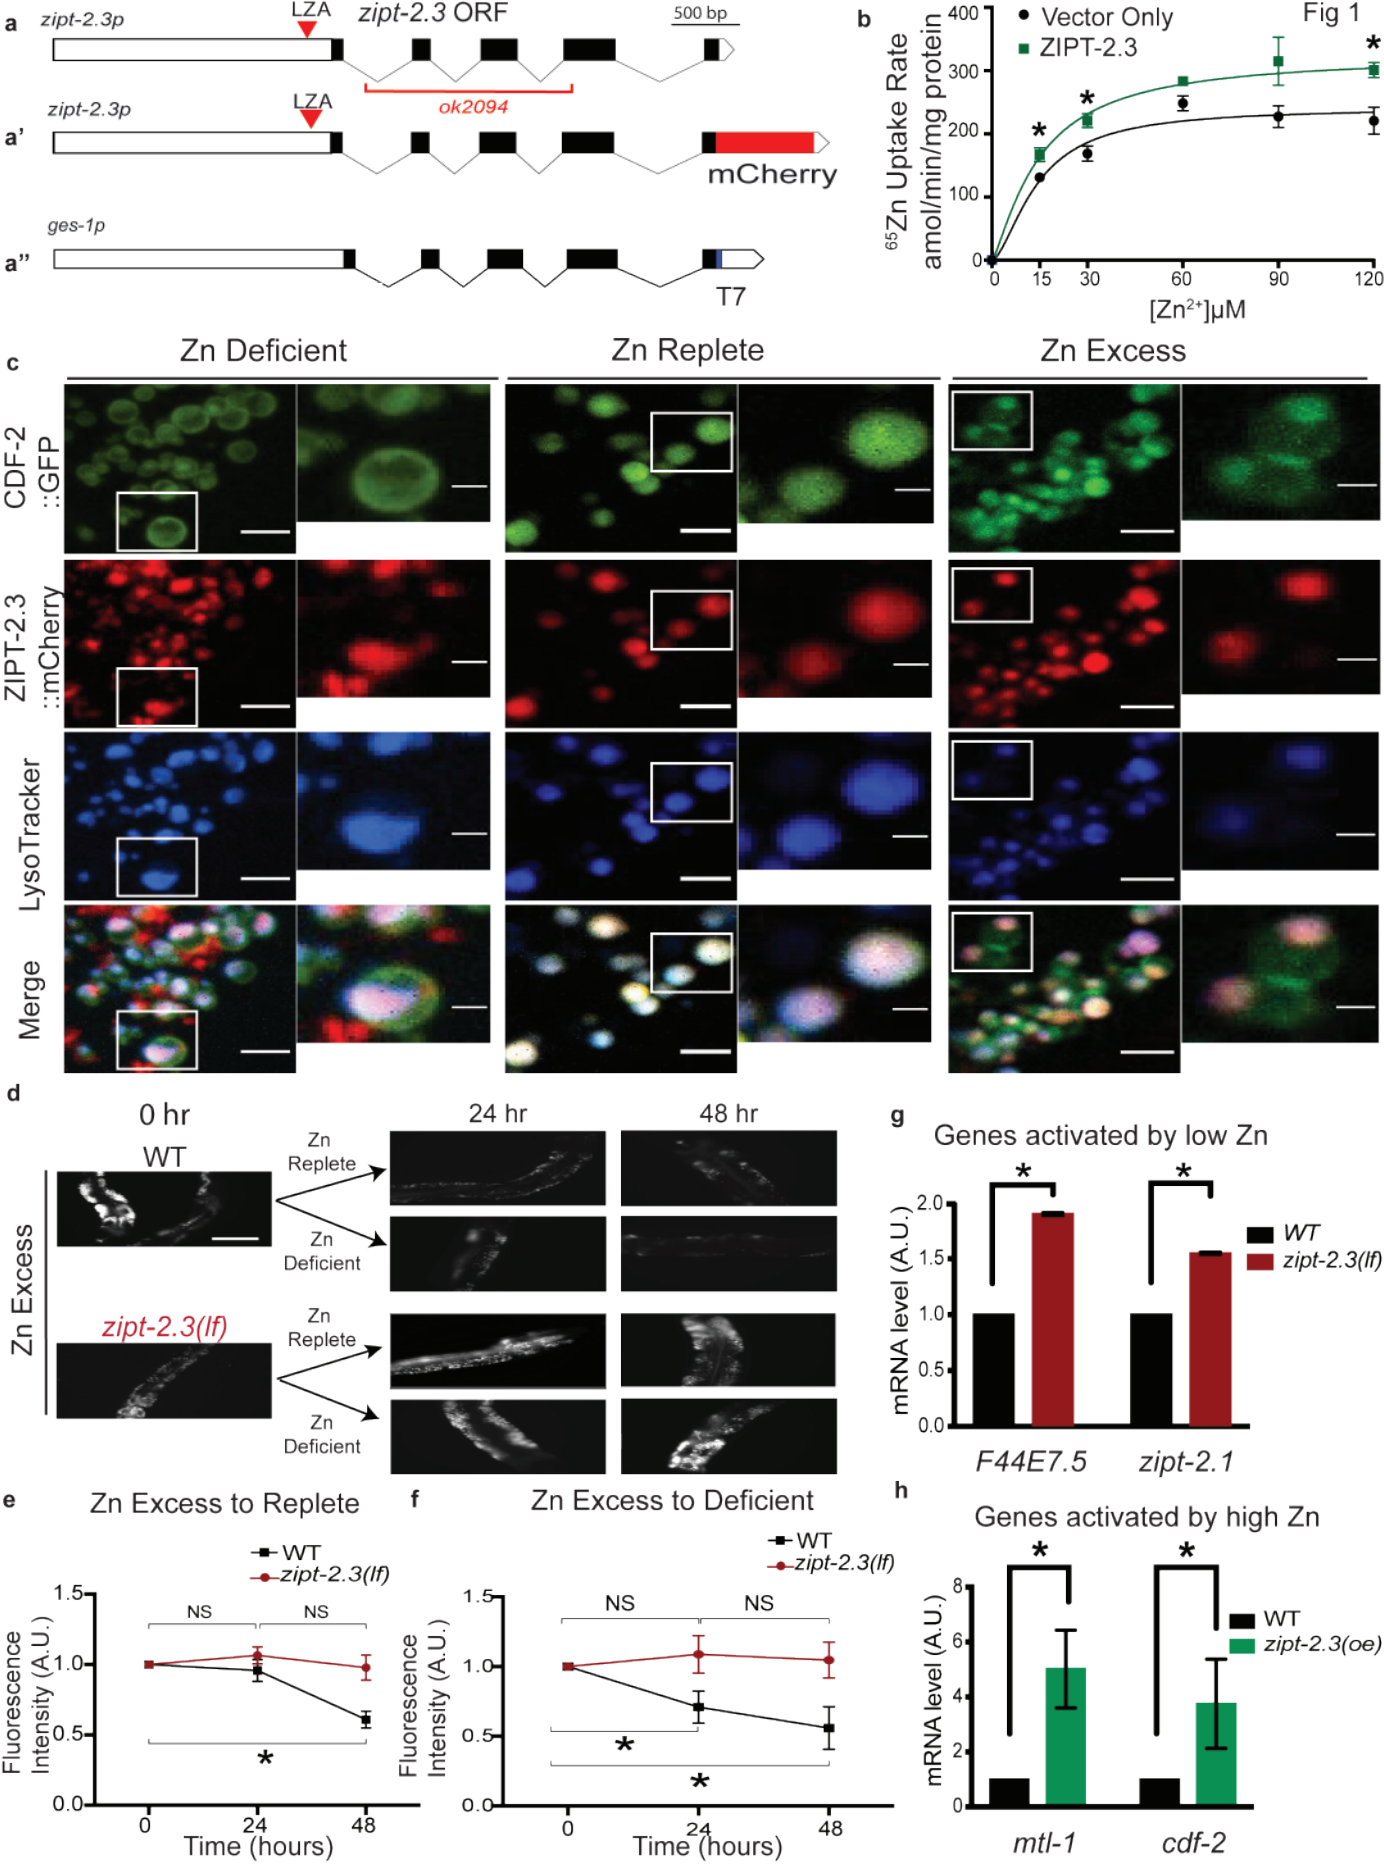

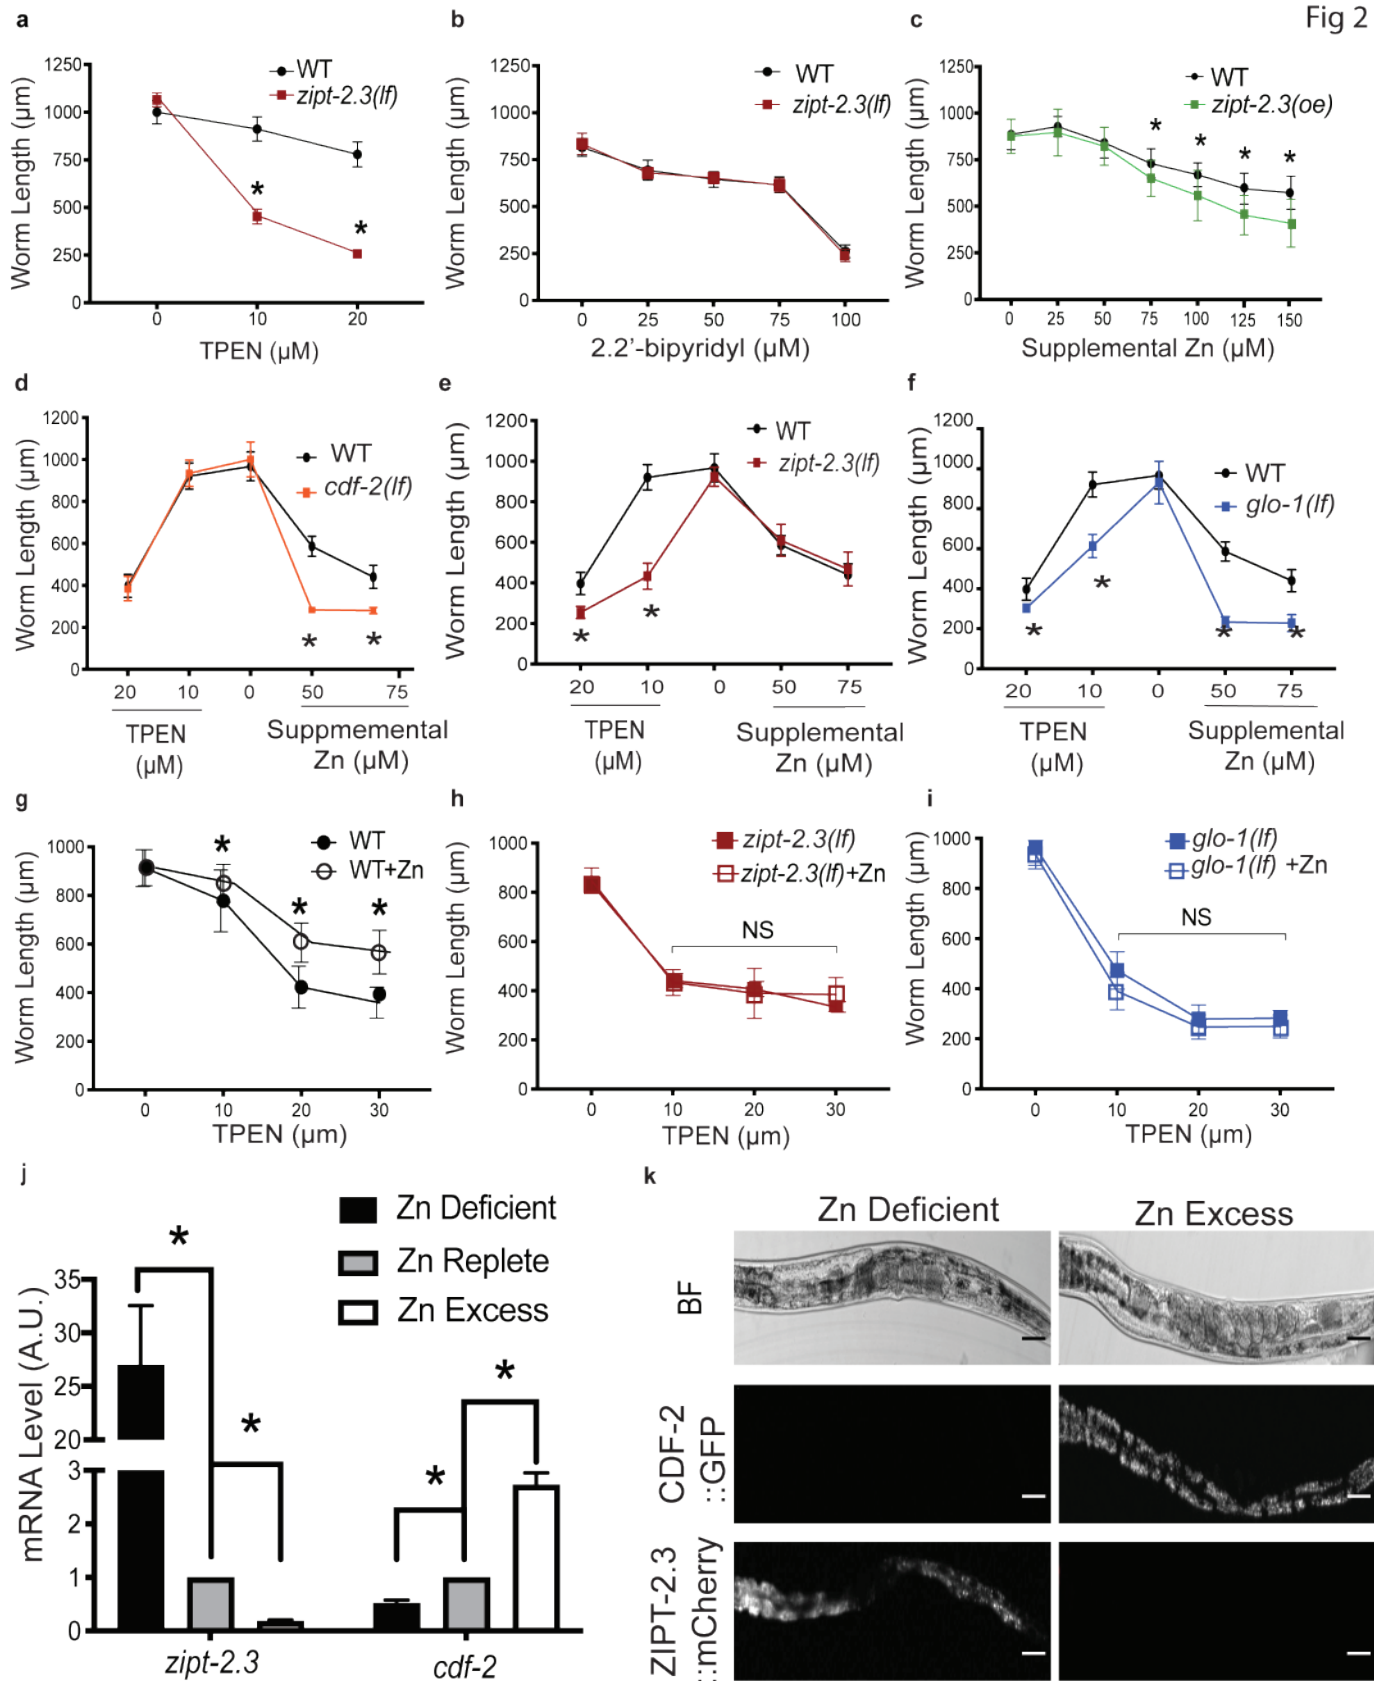

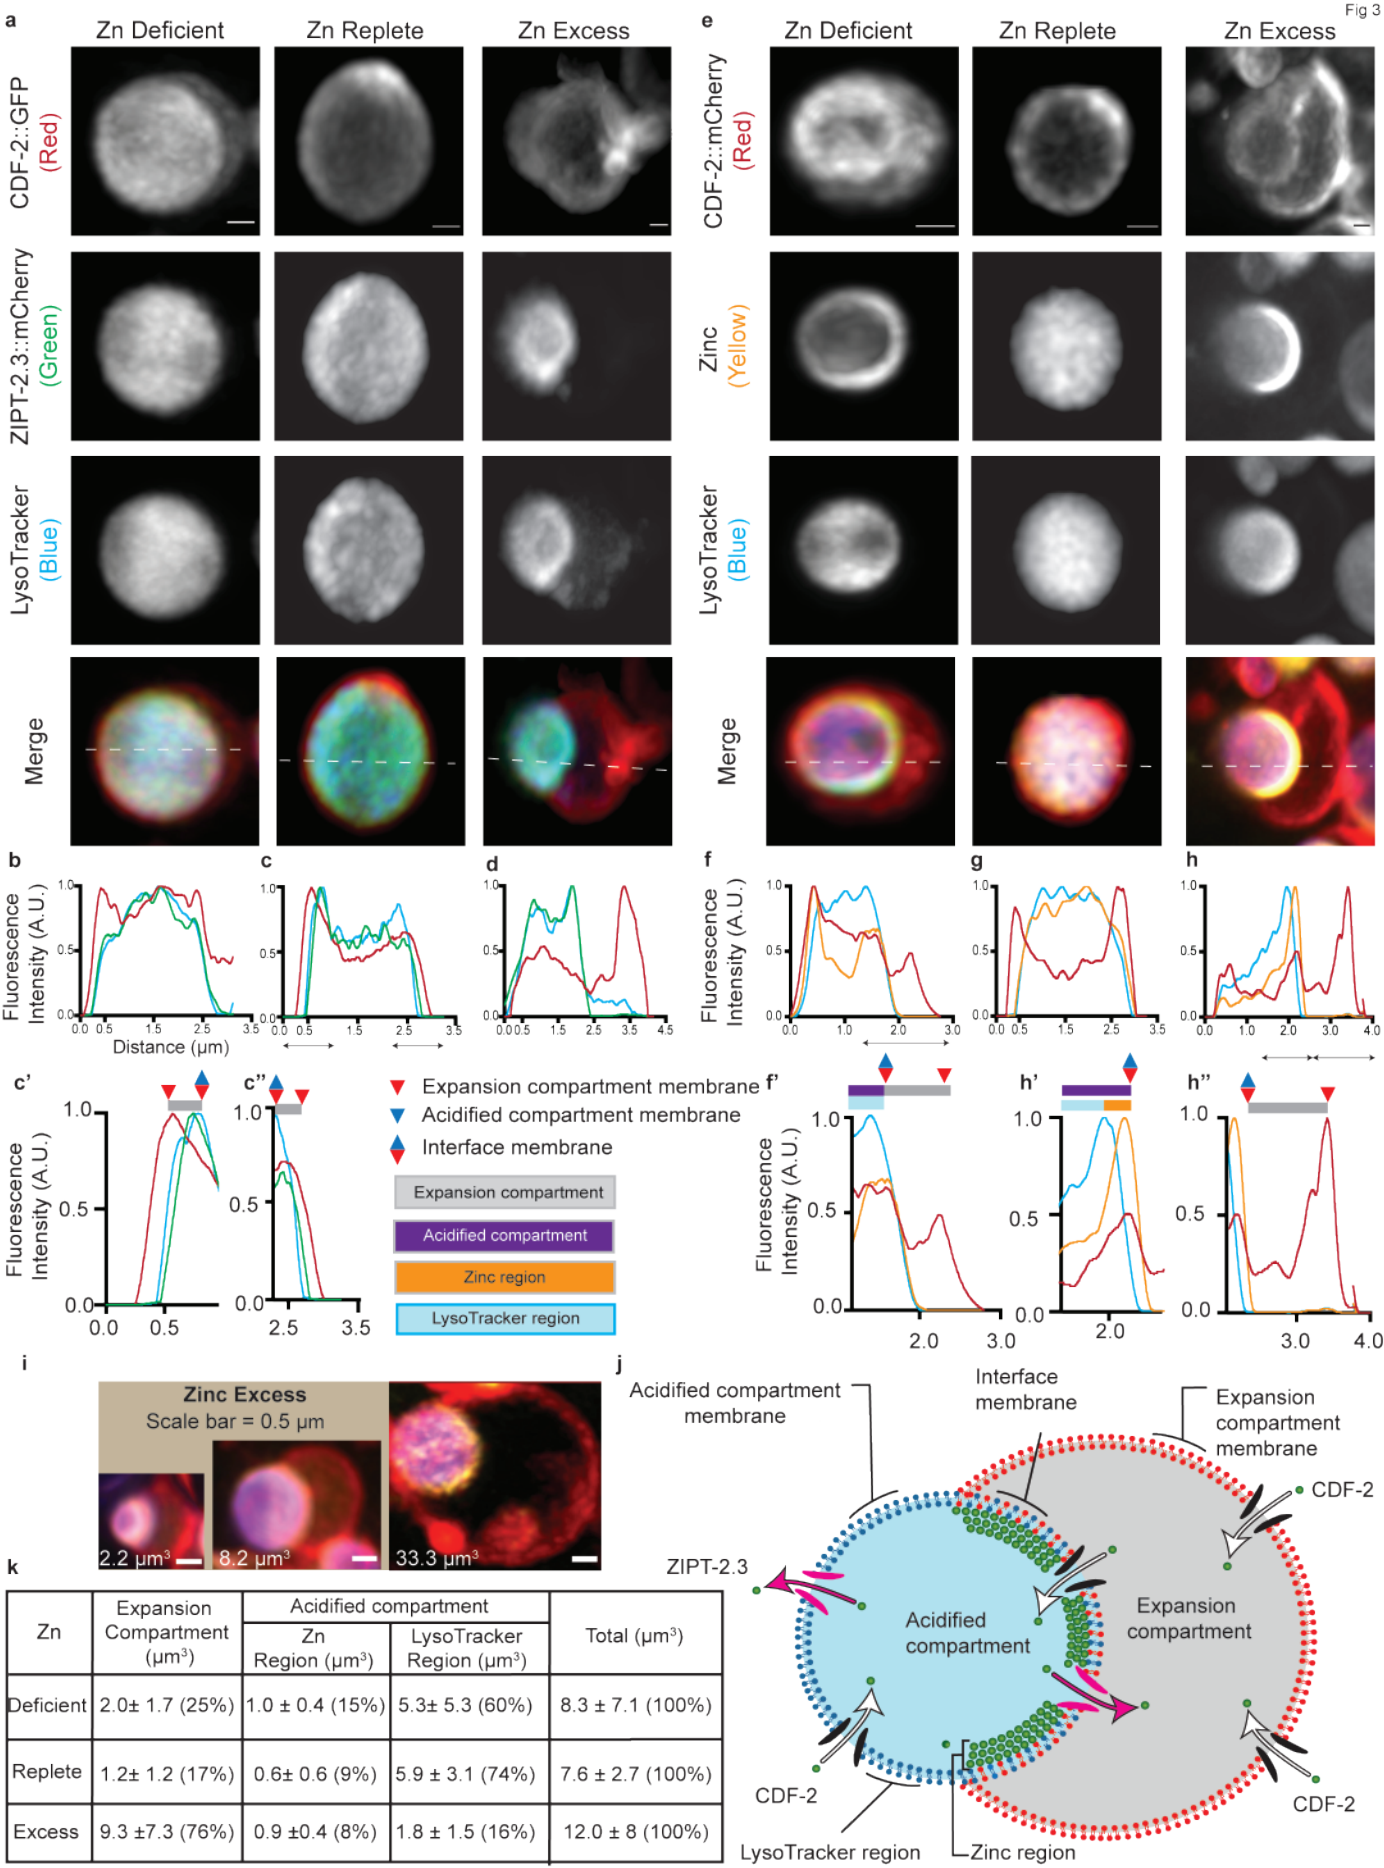

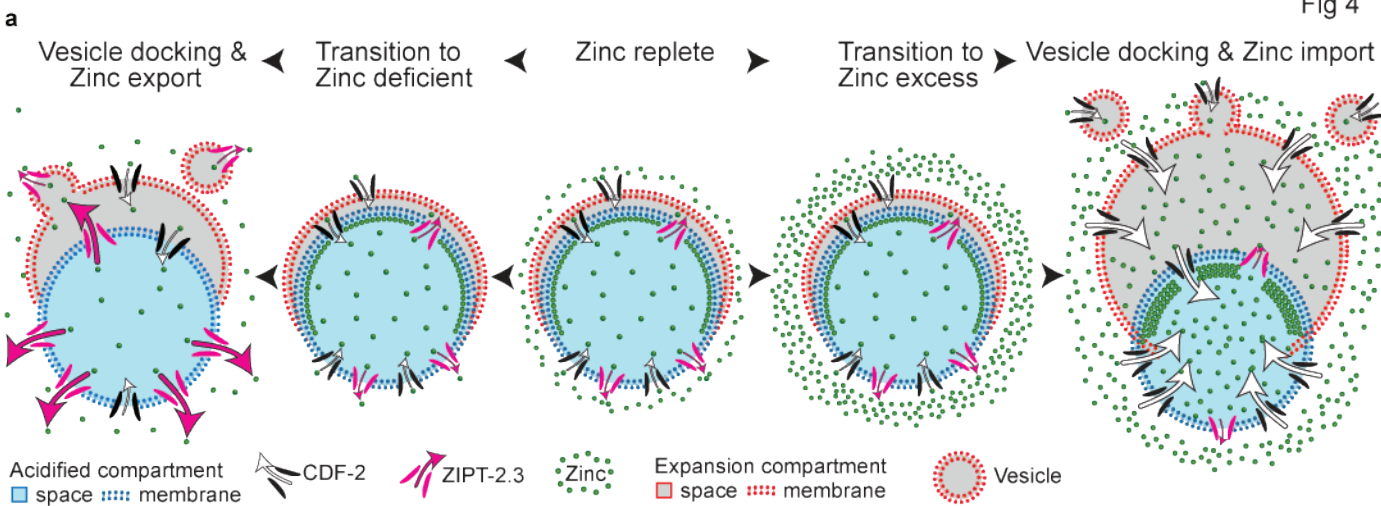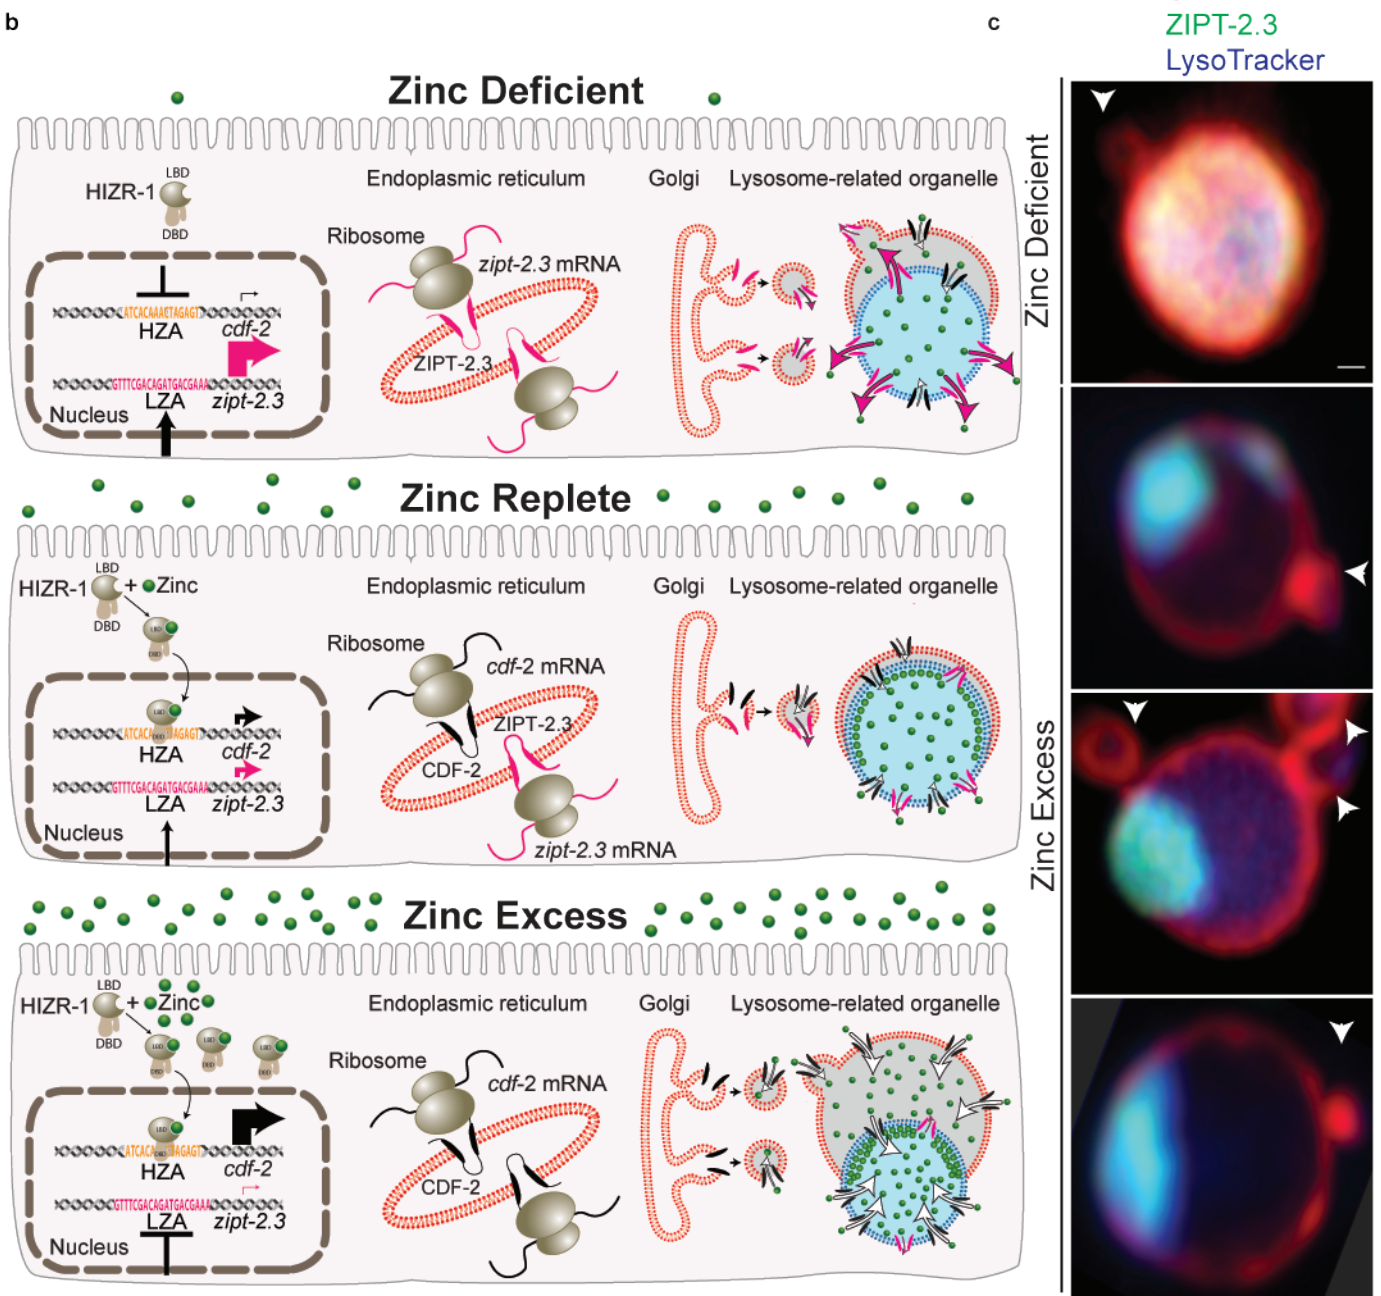

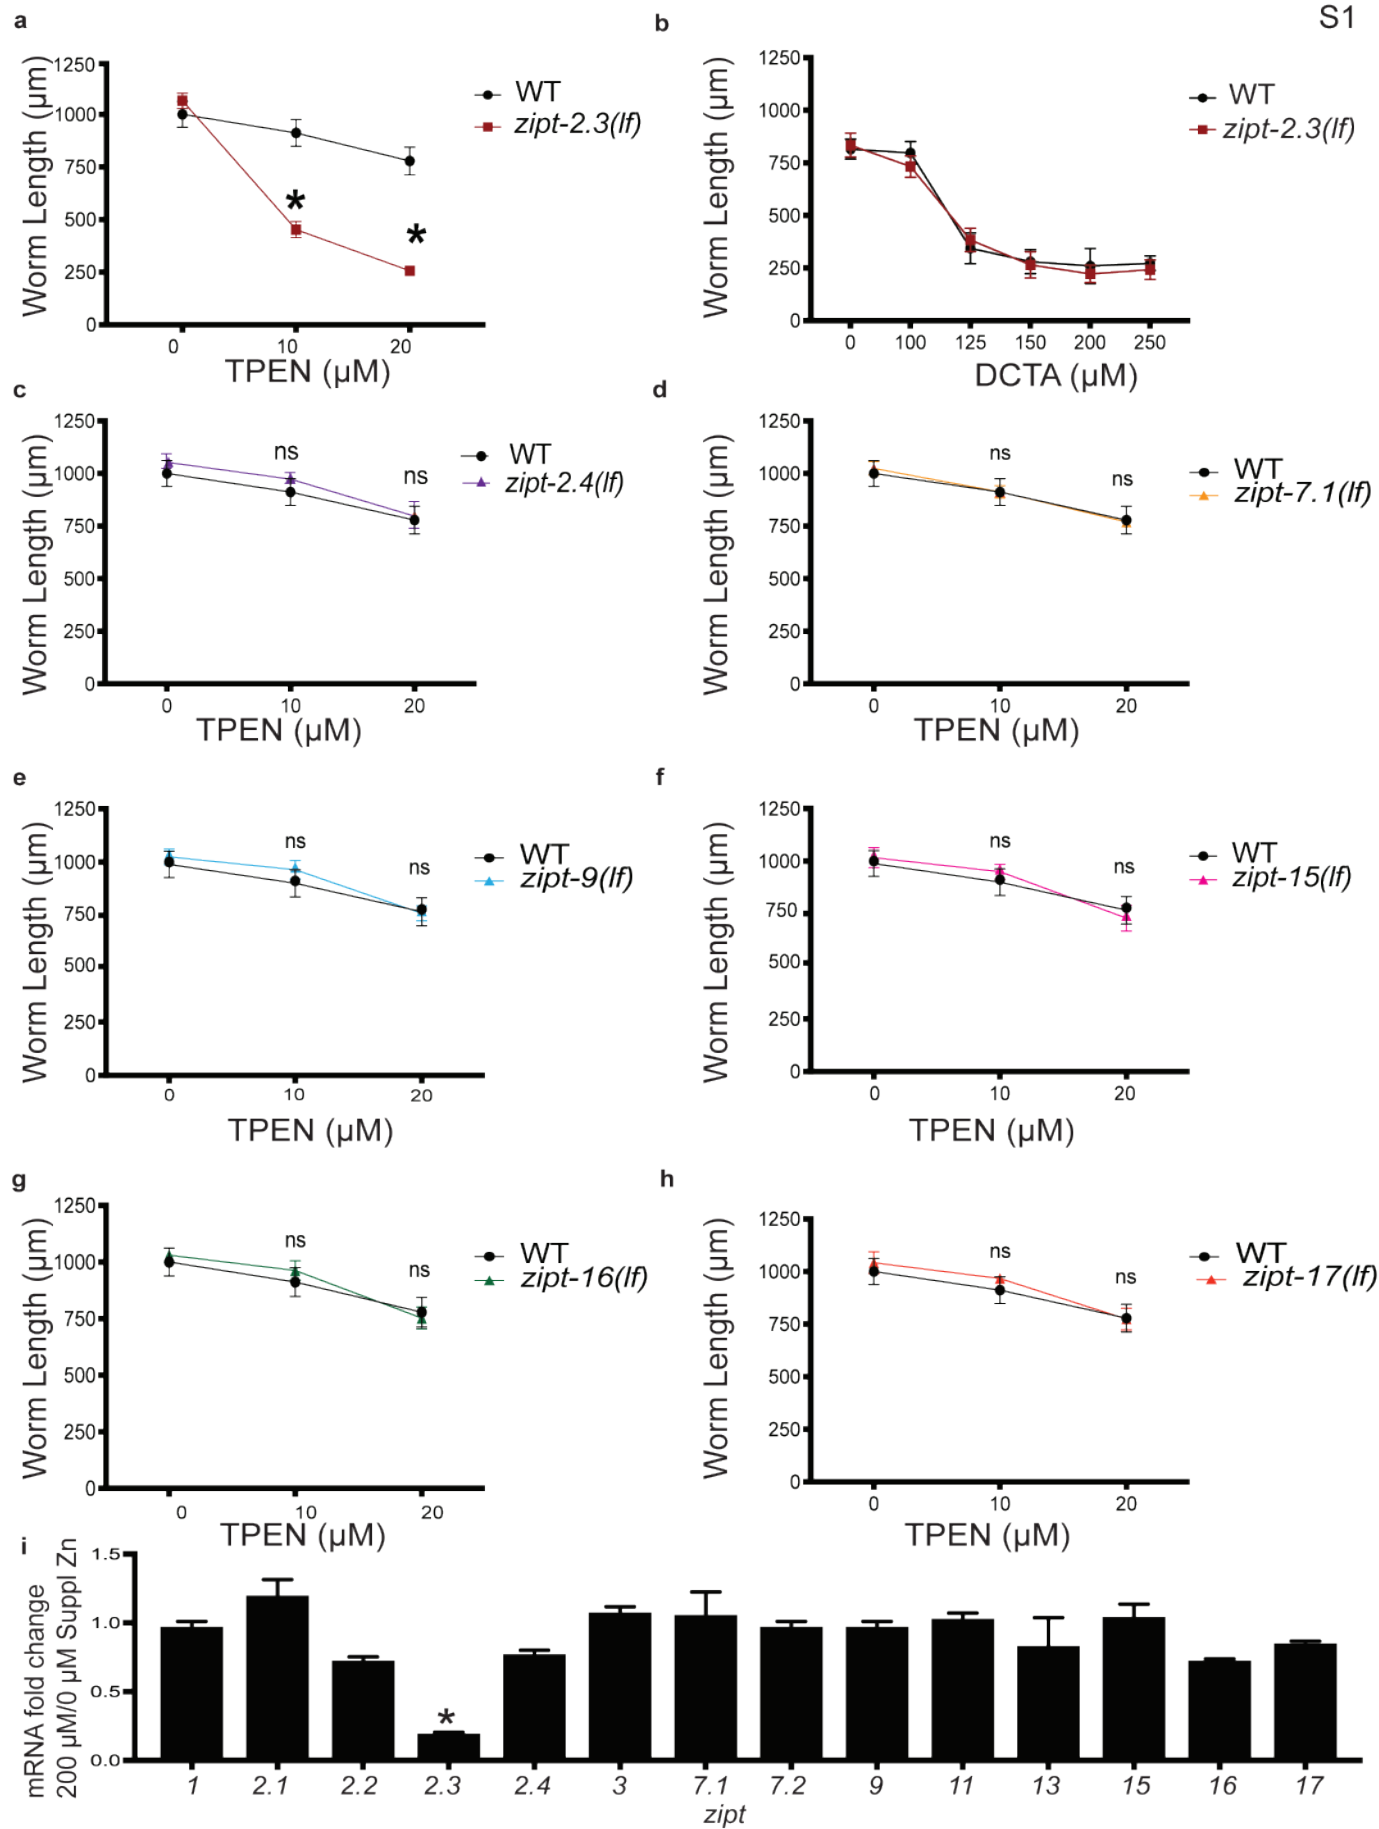

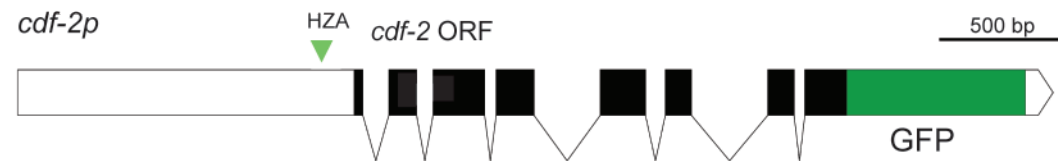

**b**

|          |     |        |       |      |      |     |     |     |       |       |       |       |       |       |       |       |       |       |       |       |       |       |   |
|----------|-----|--------|-------|------|------|-----|-----|-----|-------|-------|-------|-------|-------|-------|-------|-------|-------|-------|-------|-------|-------|-------|---|
| ZIPT-2.3 | 1   | MSLEEL | ----- | LKWI | MLGV | MA  | LM  | TI  | IFGL  | LPIK  | VI    | -     | SY    | LN    | TK    | SA    | IF    | OH    | SS    | LI    | LS    |       |   |
| DmZIP1   | 1   | MDYLL  | ----- | QVRV | GALV | GL  | LL  | LT  | IFFG  | FI    | PAR   | MK    | -     | WF    | HVT   | ---   | CG    | TE    | LH    | KAV   | LS    |       |   |
| HsZIP2   | 1   | MEQIL  | ----- | GIKL | GC   | LF  | AL  | LAL | TIGC  | GL    | TP    | IC    | FK    | -     | WF    | QID   | ---   | AA    | RG    | HR    | LV    |       |   |
| DrZIP1   | 1   | MSQEQ  | TQDV  | DH   | HAL  | LVA | KIV | S   | MV    | LV    | VIT   | VL    | CG    | SL    | PY    | LN    | RC    | FH    | WT    | KA    | S     | FE    |   |
|          |     |        |       |      |      |     |     |     |       |       |       |       |       |       |       |       |       |       |       |       |       |       |   |
| ZIPT-2.3 | 49  | LFSC   | FAGG  | VFLS | VC   | FLD | M   | LP  | DC    | LE    | AW    | ES    | VQ    | TD    | IN    | ----- | ----- | ----- | ----- | ----- | ----- | Y     |   |
| DmZIP1   | 47  | FVSC   | FAGG  | VFLS | SAC  | L   | D   | I   | P     | D     | Y     | L     | S     | D     | I     | H     | G     | E     | L     | O     | K     | R     |   |
| HsZIP2   | 47  | LLGC   | IS    | AG   | VFLC | AG  | F   | M   | H     | M     | T     | A     | E     | A     | E     | E     | I     | E     | S     | Q     | I     | O     |   |
| DrZIP1   | 61  | CLLF   | F     | EGG  | VLL  | CT  | T   | F   | L     | H     | M     | L     | E     | V     | E     | V     | E     | A     | L     | C     | E     | C     |   |
|          |     |        |       |      |      |     |     |     |       |       |       |       |       |       |       |       |       |       |       |       |       |       |   |
| ZIPT-2.3 | 92  | LI     | ALL   | G    | FF   | VY  | I   | T   | E     | L     | S     | S     | V     | I     | C     | N     | V     | G     | H     | G     | H     | -     |   |
| DmZIP1   | 90  | F      | I     | M    | A    | G   | Q   | F   | F     | V     | L     | L     | E     | K     | M     | V     | L     | S     | C     | T     | E     | -     |   |
| HsZIP2   | 107 | L      | I     | I    | S    | L   | G   | F   | F     | V     | F     | F     | L     | E     | S     | L     | A     | L     | O     | C     | C     | P     |   |
| DrZIP1   | 105 | M      | L     | L    | C    | T   | G   | F   | F     | L     | M     | Y     | A     | L     | D     | E     | L     | M     | T     | S     | L     | V     |   |
|          |     |        |       |      |      |     |     |     |       |       |       |       |       |       |       |       |       |       |       |       |       |       |   |
| ZIPT-2.3 | 140 | VG     | S     | I    | F    | N   | V   | E   | G     | N     | L     | V     | E     | P     | C     | K     | R     | S     | L     | E     | ----- | ----- |   |
| DmZIP1   | 134 | H      | P     | S    | V    | N   | D   | L   | E     | G     | S     | G     | ----- | ----- | ----- | ----- | ----- | ----- | ----- | ----- | ----- | ----- |   |
| HsZIP2   | 133 | G      | S     | T    | V    | O   | D   | E   | E     | W     | G     | G     | ----- | ----- | ----- | ----- | ----- | ----- | ----- | ----- | ----- | ----- |   |
| DrZIP1   | 162 | E      | V     | E    | V    | K   | D   | T   | E     | P     | O     | P     | ----- | ----- | ----- | ----- | ----- | ----- | ----- | ----- | ----- | ----- |   |
|          |     |        |       |      |      |     |     |     |       |       |       |       |       |       |       |       |       |       |       |       |       |       |   |
| ZIPT-2.3 | 191 | G      | I     | O    | E    | D   | A   | V   | S     | V     | T     | S     | I     | F     | L     | G     | I     | A     | M     | H     | K     | A     |   |
| DmZIP1   | 178 | G      | L     | O    | T    | N   | A   | K   | V     | L     | E     | I     | C     | A     | L     | L     | V     | H     | K     | S     | I     | V     | F |
| HsZIP2   | 184 | G      | L     | O    | F    | T   | V   | A   | A     | T     | V     | O     | C     | L     | A     | V     | L     | A     | H     | K     | G     | L     | V |
| DrZIP1   | 213 | G      | L     | E    | G    | T   | V   | S   | T     | V     | W     | F     | M     | F     | G     | A     | V     | S     | A     | H     | K     | L     |   |
|          |     |        |       |      |      |     |     |     |       |       |       |       |       |       |       |       |       |       |       |       |       |       |   |
| ZIPT-2.3 | 251 | I      | L     | I    | S    | S   | N   | M   | N     | O     | T     | P     | R     | D     | I     | T     | T     | A     | V     | L     | M     | S     |   |
| DmZIP1   | 237 | I      | V     | V    | I    | E   | T   | E   | R     | -     | O     | A     | -     | G     | G     | L     | I     | O     | A     | V     | L     | E     |   |
| HsZIP2   | 243 | L      | A     | V    | T    | G   | G   | D   | S     | -     | E     | G     | G     | R     | G     | I     | A     | O     | A     | V     | L     | E     |   |
| DrZIP1   | 272 | L      | G     | I    | S    | Q   | Q   | V   | A     | -     | A     | G     | O     | P     | S     | L     | P     | S     | V     | L     | O     | G     |   |
|          |     |        |       |      |      |     |     |     |       |       |       |       |       |       |       |       |       |       |       |       |       |       |   |
| ZIPT-2.3 | 311 | L      | A     | V    | N    | M   | W   | A   | T     | ----- | ----- | ----- | ----- | ----- | ----- | ----- | ----- | ----- | ----- | ----- | ----- |       |   |
| DmZIP1   | 295 | M      | A     | A    | L    | C   | F   | L   | G     | ----- | ----- | ----- | ----- | ----- | ----- | ----- | ----- | ----- | ----- | ----- | ----- |       |   |
| HsZIP2   | 302 | M      | A     | E    | L    | A   | W   | A   | ----- | ----- | ----- | ----- | ----- | ----- | ----- | ----- | ----- | ----- | ----- | ----- | ----- |       |   |
| DrZIP1   | 327 | M      | F     | G    | L    | O   | I   | L   | S     | D     | E     | A     | E     | G     | D     | D     | S     | L     | T     | C     | S     | ----- |   |

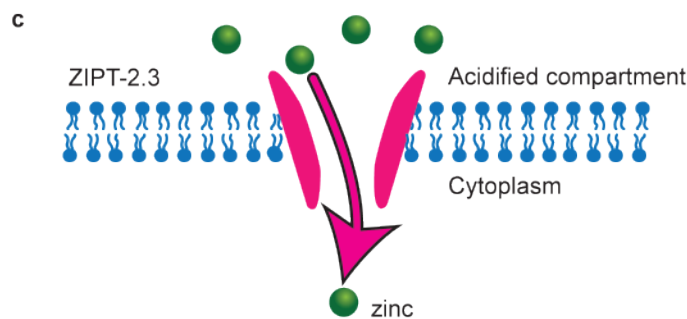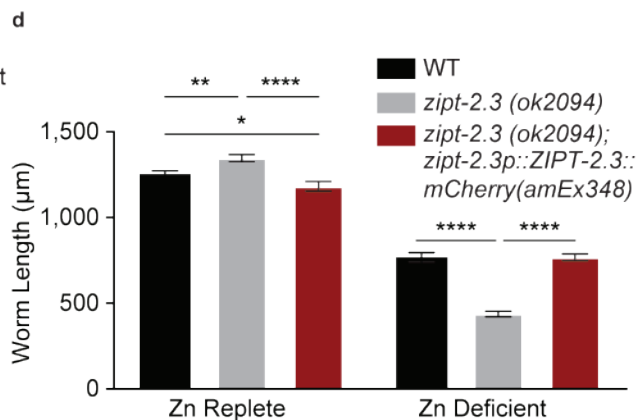

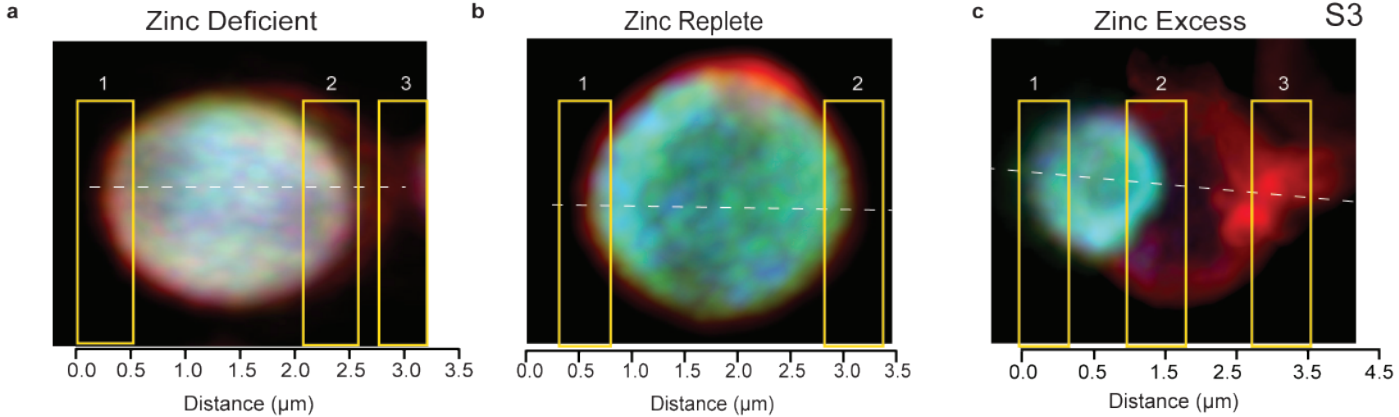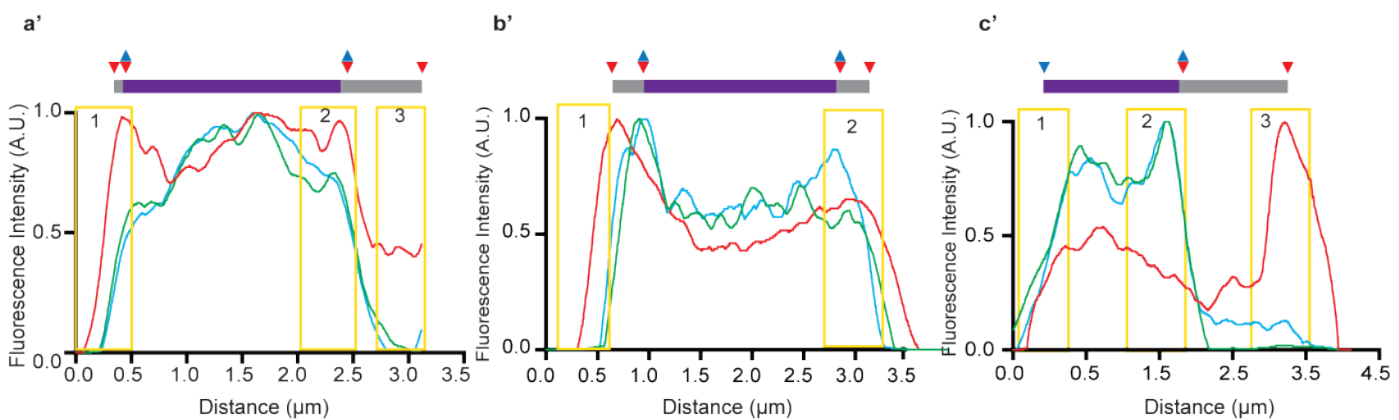**Line Scan data**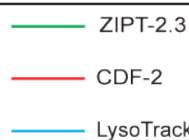**Line Scan Interpretation**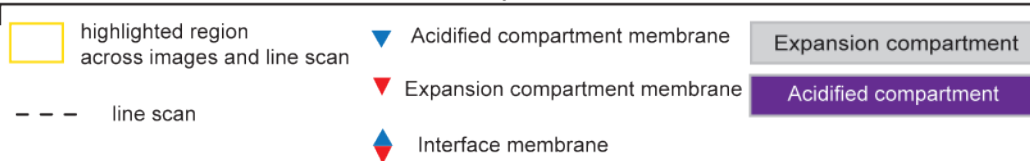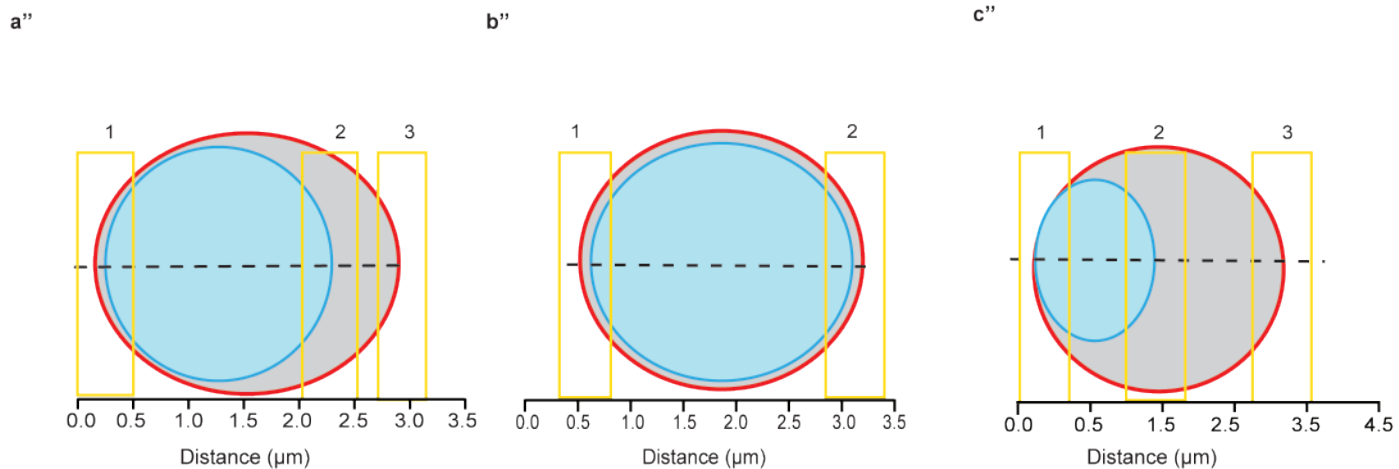

Acidified compartment  
□ space — membrane

Expansion compartment  
□ space — membrane

□ highlighted region across images and line scan  
- - - line scan



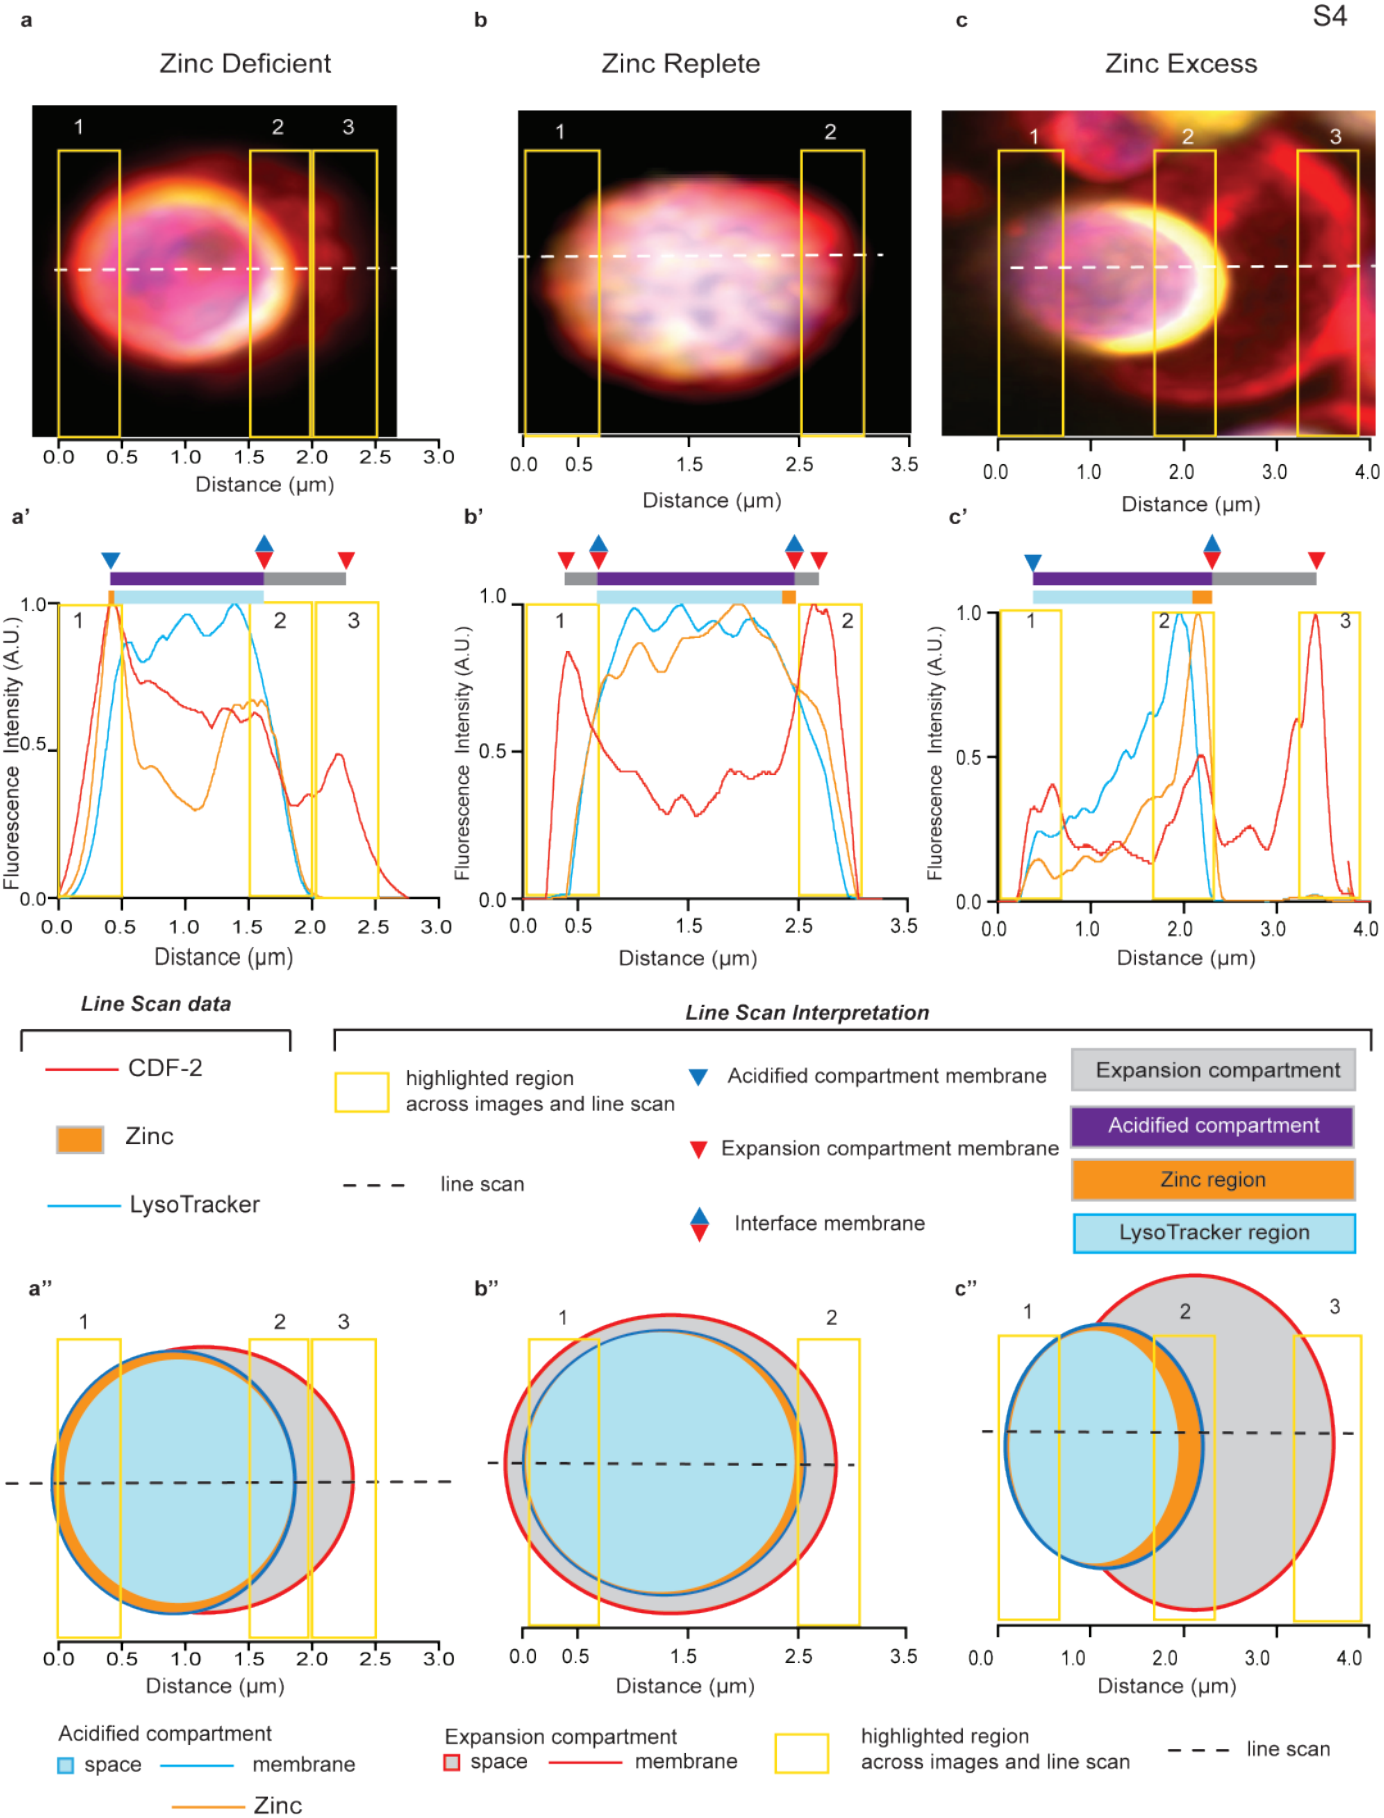

Zn Deficient Calculations

LysoTracker  
Region

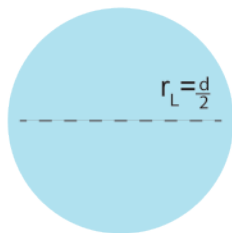

$$V_L = \frac{4}{3} \pi r_L^3$$

a'

Zinc  
Region

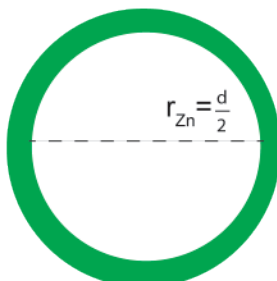

$$V_{Zn} = \frac{4}{3} \pi r_{Zn}^3 - V_L$$

a''

Expansion  
Compartment

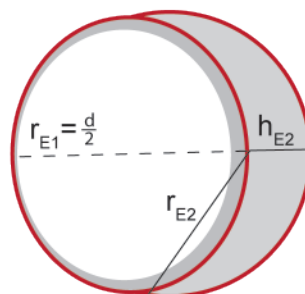

$$V_E = \frac{4}{3} \pi r_{E1}^3 - V_{Zn} - V_L + \pi h_{E2}^2 \left( r_{E2} - \frac{h_{E2}}{3} \right)$$

b

Zn Replete Calculations

LysoTracker  
Region

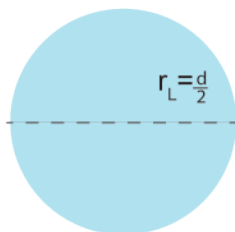

$$V_L = \frac{4}{3} \pi r_L^3$$

b'

Zinc  
Region

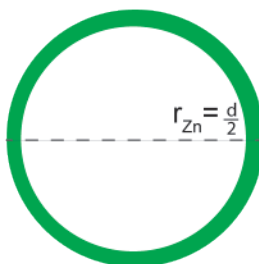

$$V_{Zn} = \frac{4}{3} \pi r_{Zn}^3 - V_L$$

b''

Expansion  
Compartment

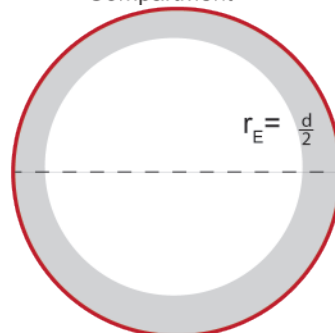

$$V_E = \frac{4}{3} \pi r_E^3 - V_{Zn} - V_L$$

c

Zn Excess Calculations

LysoTracker  
Region

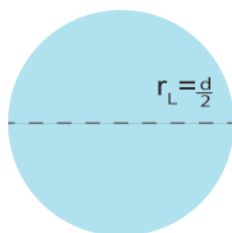

$$V_L = \frac{4}{3} \pi r_L^3$$

c'

Zinc  
Region

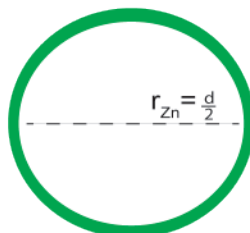

$$V_{Zn} = \frac{4}{3} \pi r_{Zn}^3 - V_L$$

c''

Expansion  
Compartment

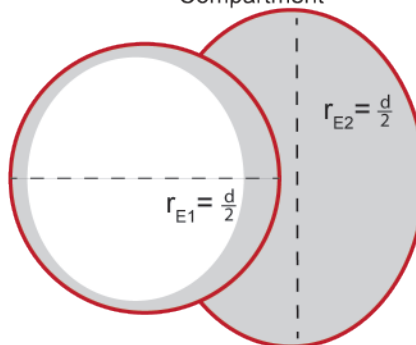

$$V_E = \frac{4}{3} \pi r_{E1}^3 + \frac{4}{3} \pi r_{E2}^3 - V_{Zn} - V_L$$

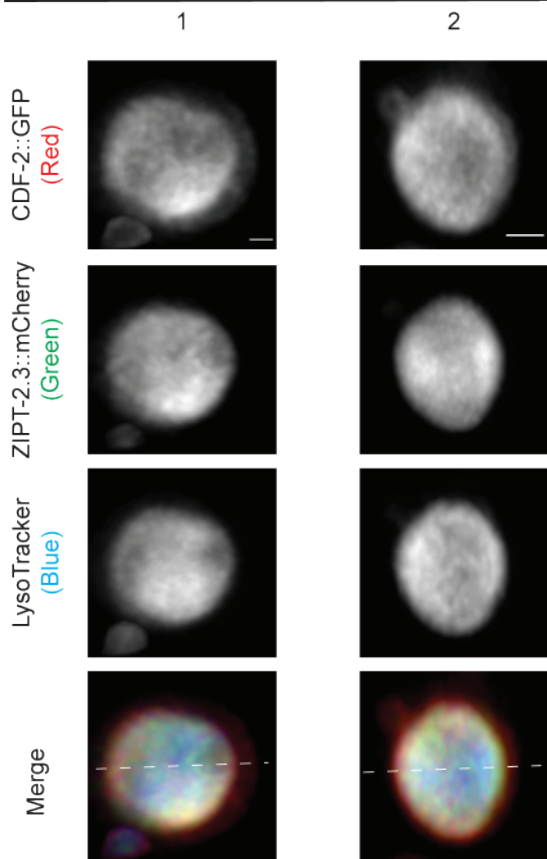

## Line Scan data

## Line Scan Interpretation

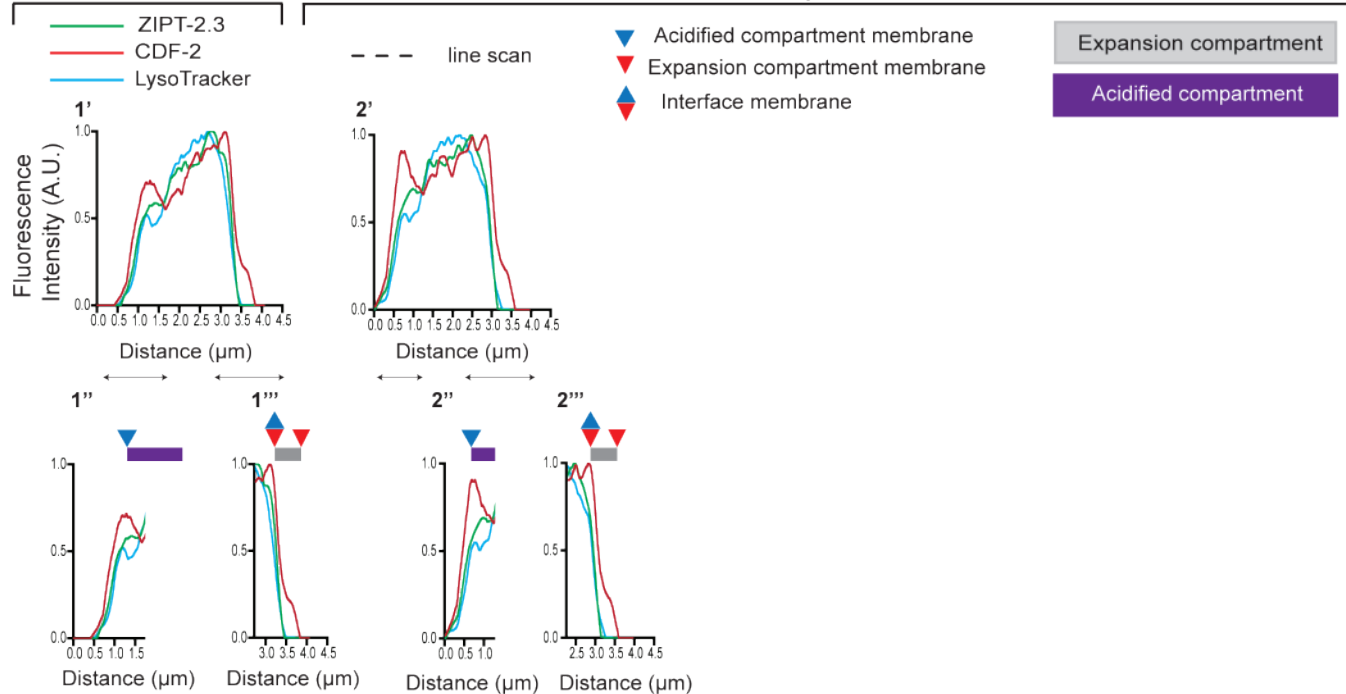

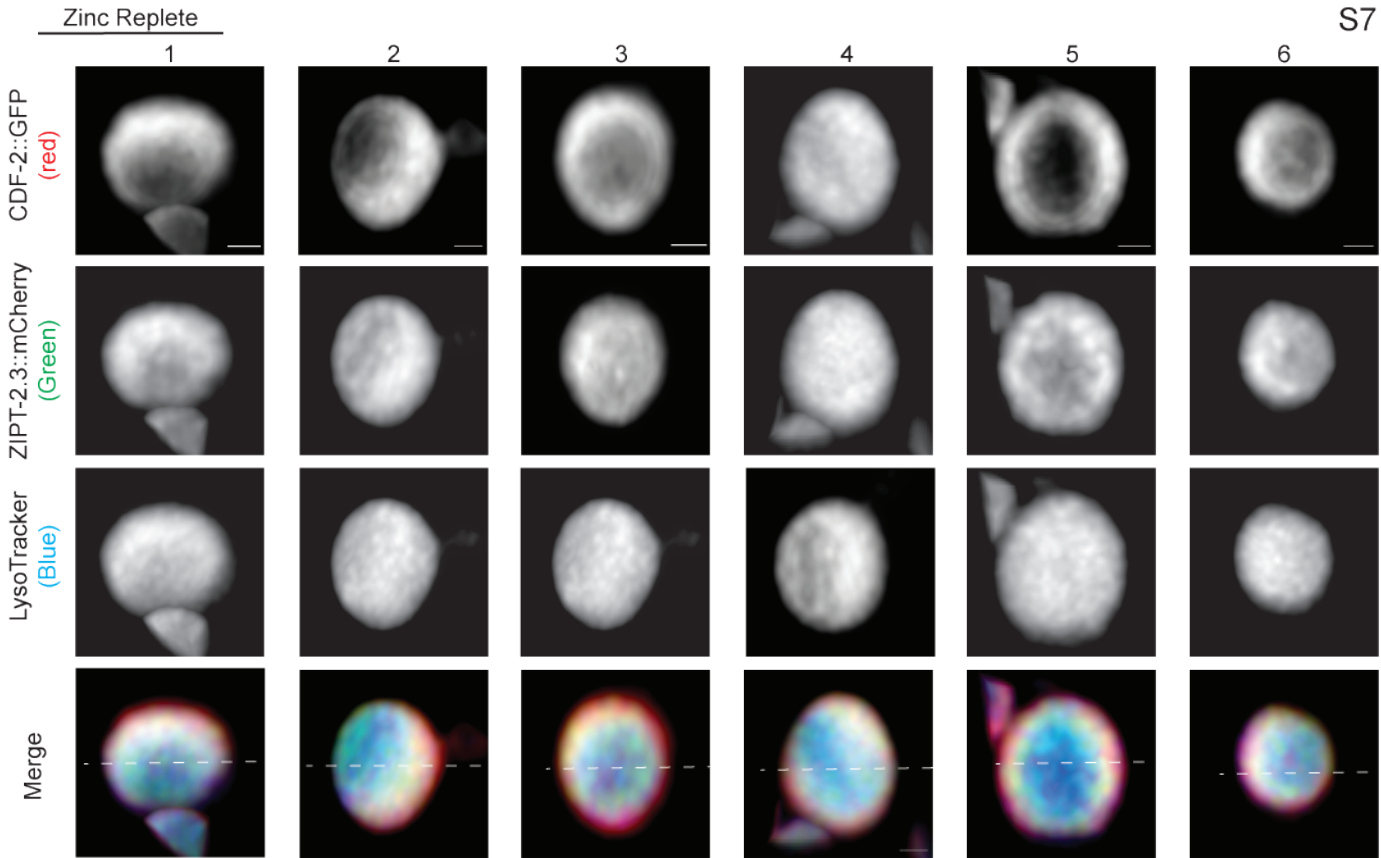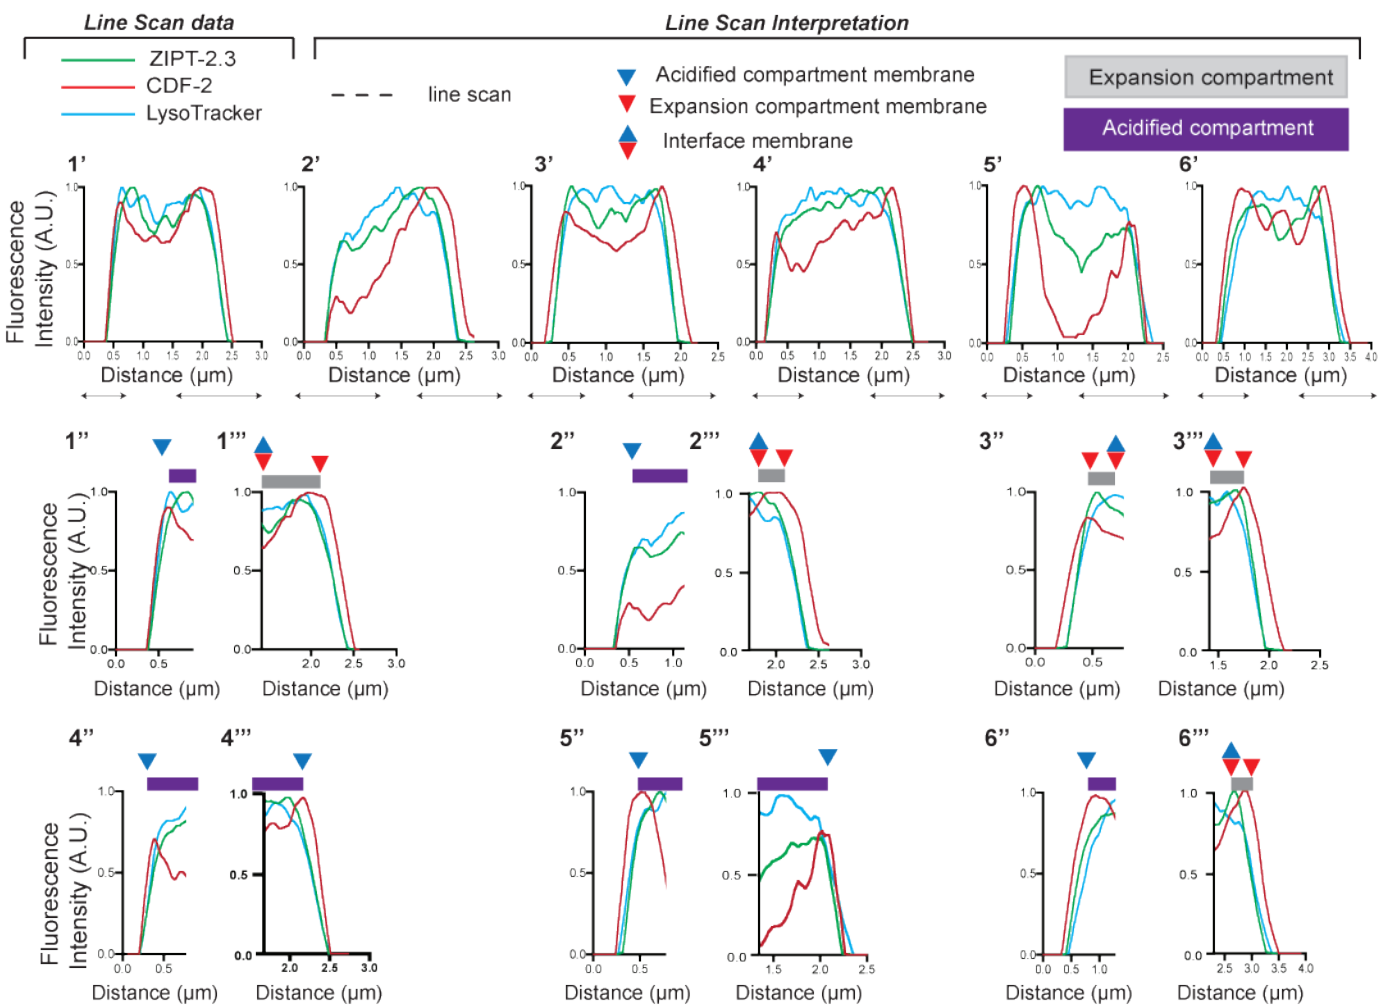



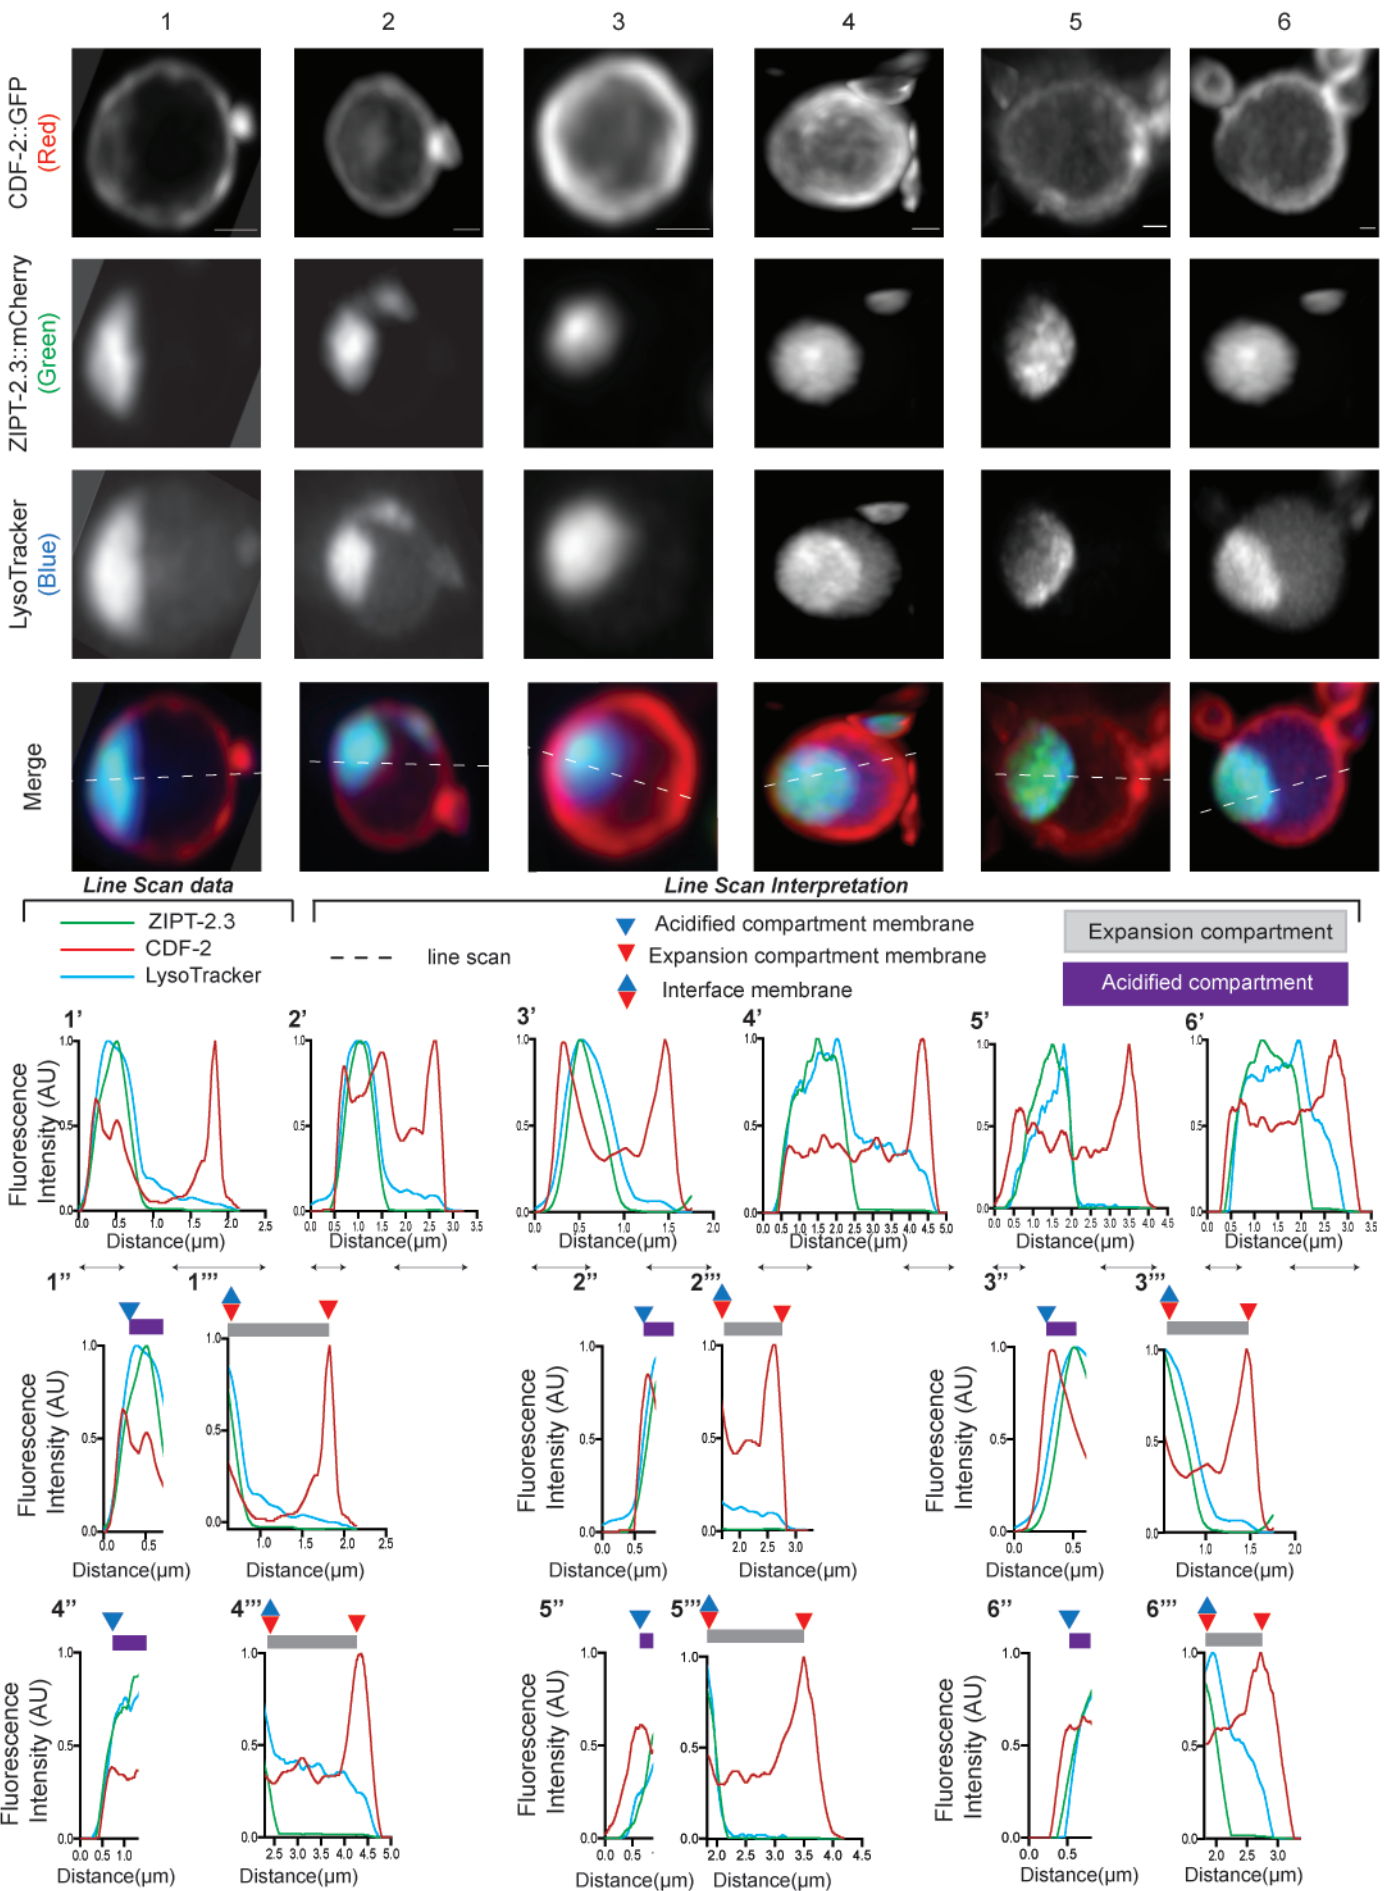

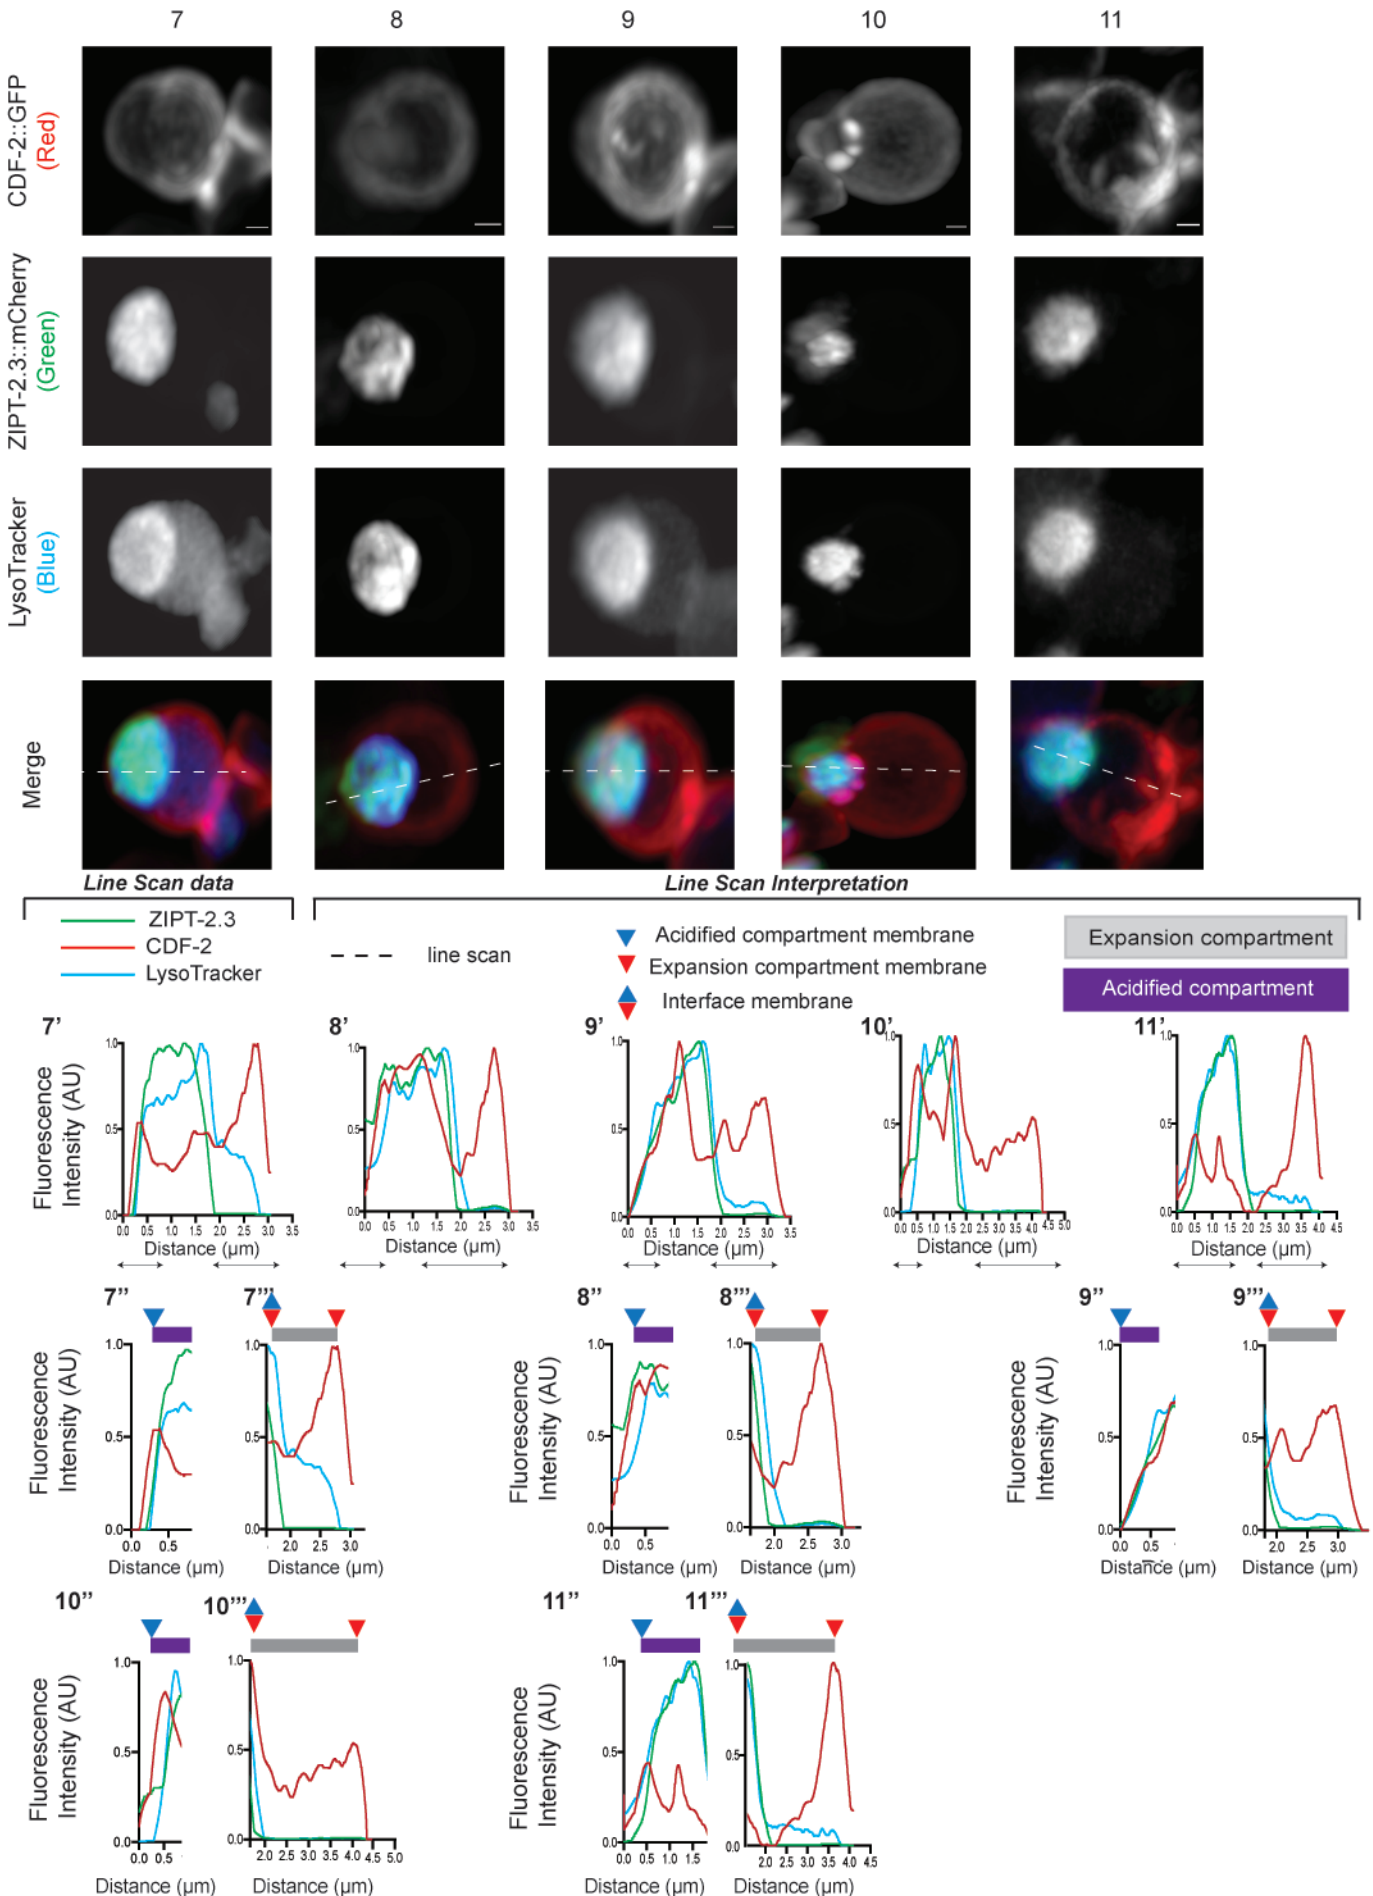

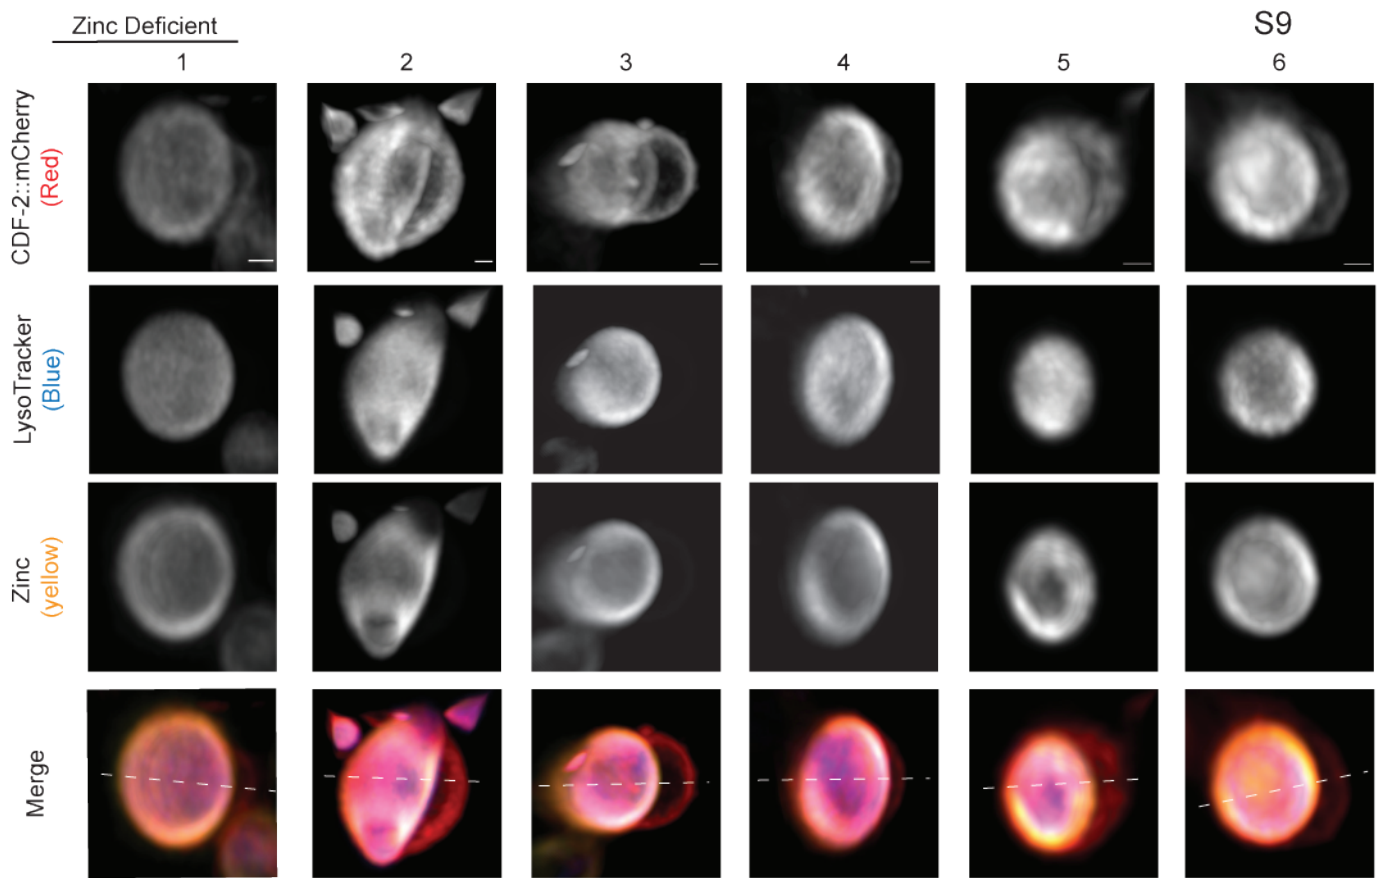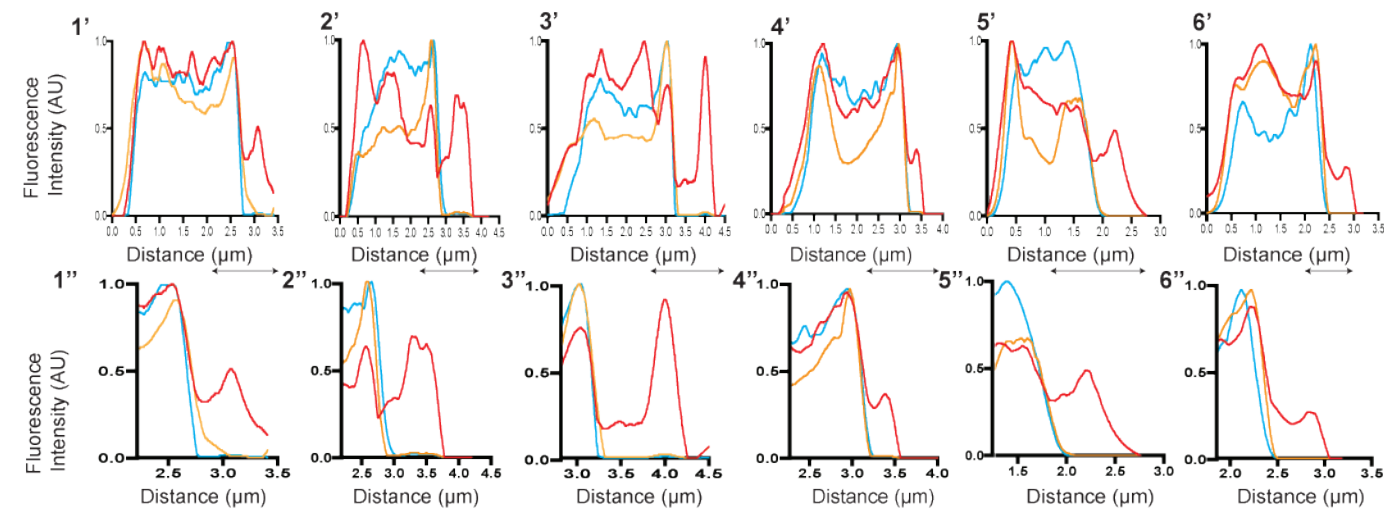

**g**

|       |                          |                          |                         |                          |                          |                          |
|-------|--------------------------|--------------------------|-------------------------|--------------------------|--------------------------|--------------------------|
| EC    | 1.0 $\mu\text{m}^3$ 15%  | 1.5 $\mu\text{m}^3$ 21%  | 3.2 $\mu\text{m}^3$ 29% | 1.4 $\mu\text{m}^3$ 16%  | 1.2 $\mu\text{m}^3$ 32%  | 0.9 $\mu\text{m}^3$ 20%  |
| LR    | 5.0 $\mu\text{m}^3$ 74%  | 4.2 $\mu\text{m}^3$ 59%  | 6.4 $\mu\text{m}^3$ 58% | 5.8 $\mu\text{m}^3$ 68%  | 2.1 $\mu\text{m}^3$ 51%  | 2.3 $\mu\text{m}^3$ 48%  |
| ZR    | 0.7 $\mu\text{m}^3$ 11%  | 1.4 $\mu\text{m}^3$ 20%  | 1.5 $\mu\text{m}^3$ 13% | 1.3 $\mu\text{m}^3$ 16%  | 0.7 $\mu\text{m}^3$ 18%  | 1.5 $\mu\text{m}^3$ 32%  |
| Total | 6.7 $\mu\text{m}^3$ 100% | 7.1 $\mu\text{m}^3$ 100% | 11 $\mu\text{m}^3$ 100% | 8.4 $\mu\text{m}^3$ 100% | 4.2 $\mu\text{m}^3$ 100% | 4.7 $\mu\text{m}^3$ 100% |



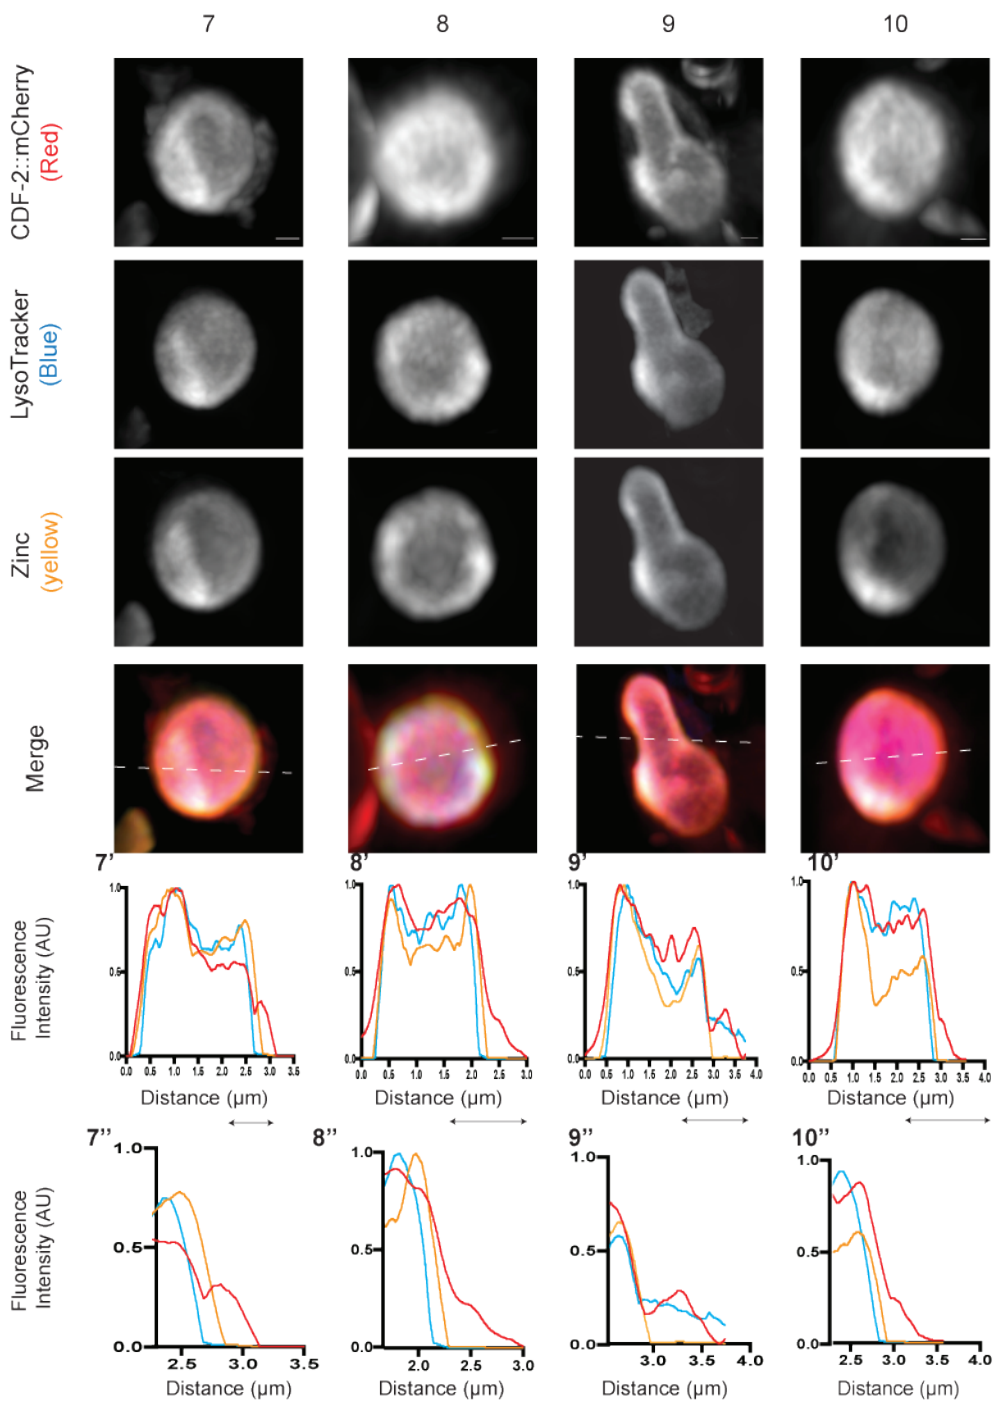

|       |                     |      |                     |      |                      |      |                     |      |
|-------|---------------------|------|---------------------|------|----------------------|------|---------------------|------|
| EC    | 2.6 $\mu\text{m}^3$ | 32%  | 0.9 $\mu\text{m}^3$ | 23%  | 6.5 $\mu\text{m}^3$  | 23%  | 1.0 $\mu\text{m}^3$ | 18%  |
| LR    | 5.0 $\mu\text{m}^3$ | 61%  | 2.0 $\mu\text{m}^3$ | 53%  | 20.6 $\mu\text{m}^3$ | 73%  | 3.5 $\mu\text{m}^3$ | 63%  |
| ZR    | 0.6 $\mu\text{m}^3$ | 7%   | 0.9 $\mu\text{m}^3$ | 23%  | 1.2 $\mu\text{m}^3$  | 4%   | 1.1 $\mu\text{m}^3$ | 19%  |
| Total | 8.2 $\mu\text{m}^3$ | 100% | 3.8 $\mu\text{m}^3$ | 100% | 28.4 $\mu\text{m}^3$ | 100% | 5.6 $\mu\text{m}^3$ | 100% |

## Zinc Replete

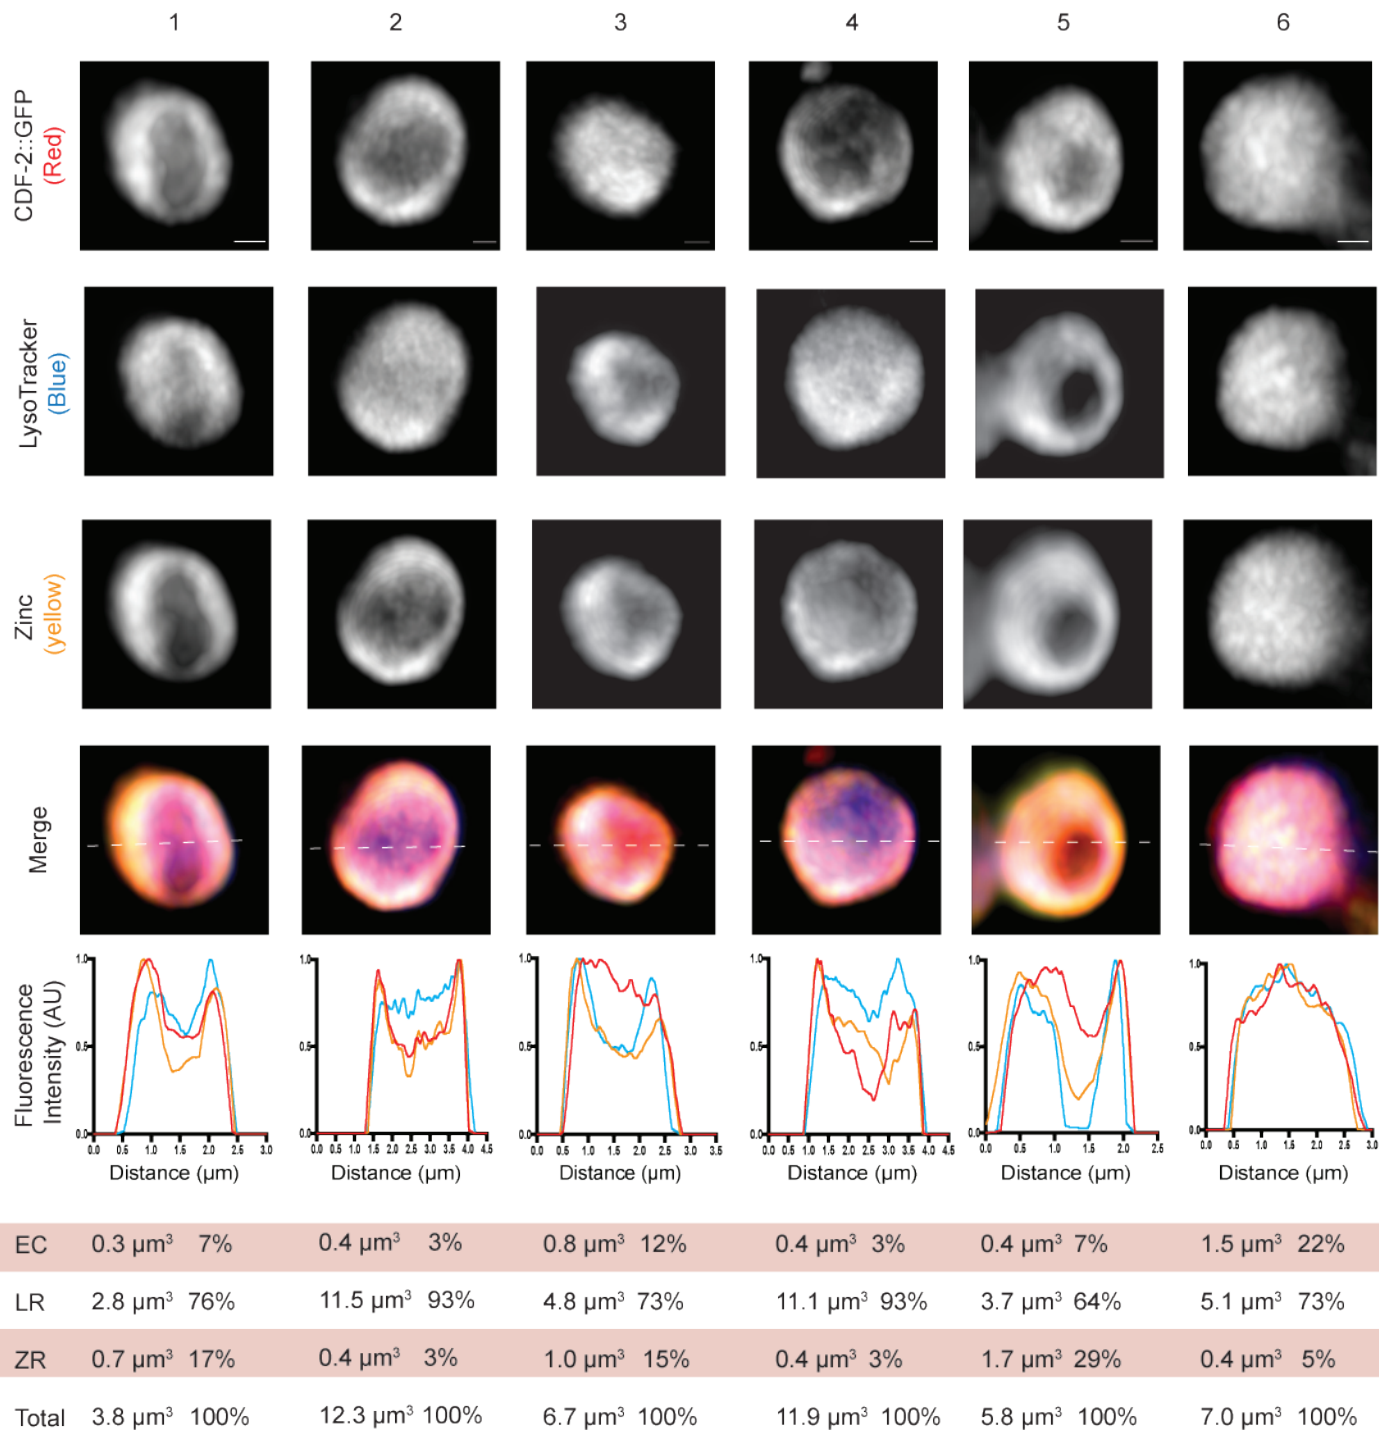

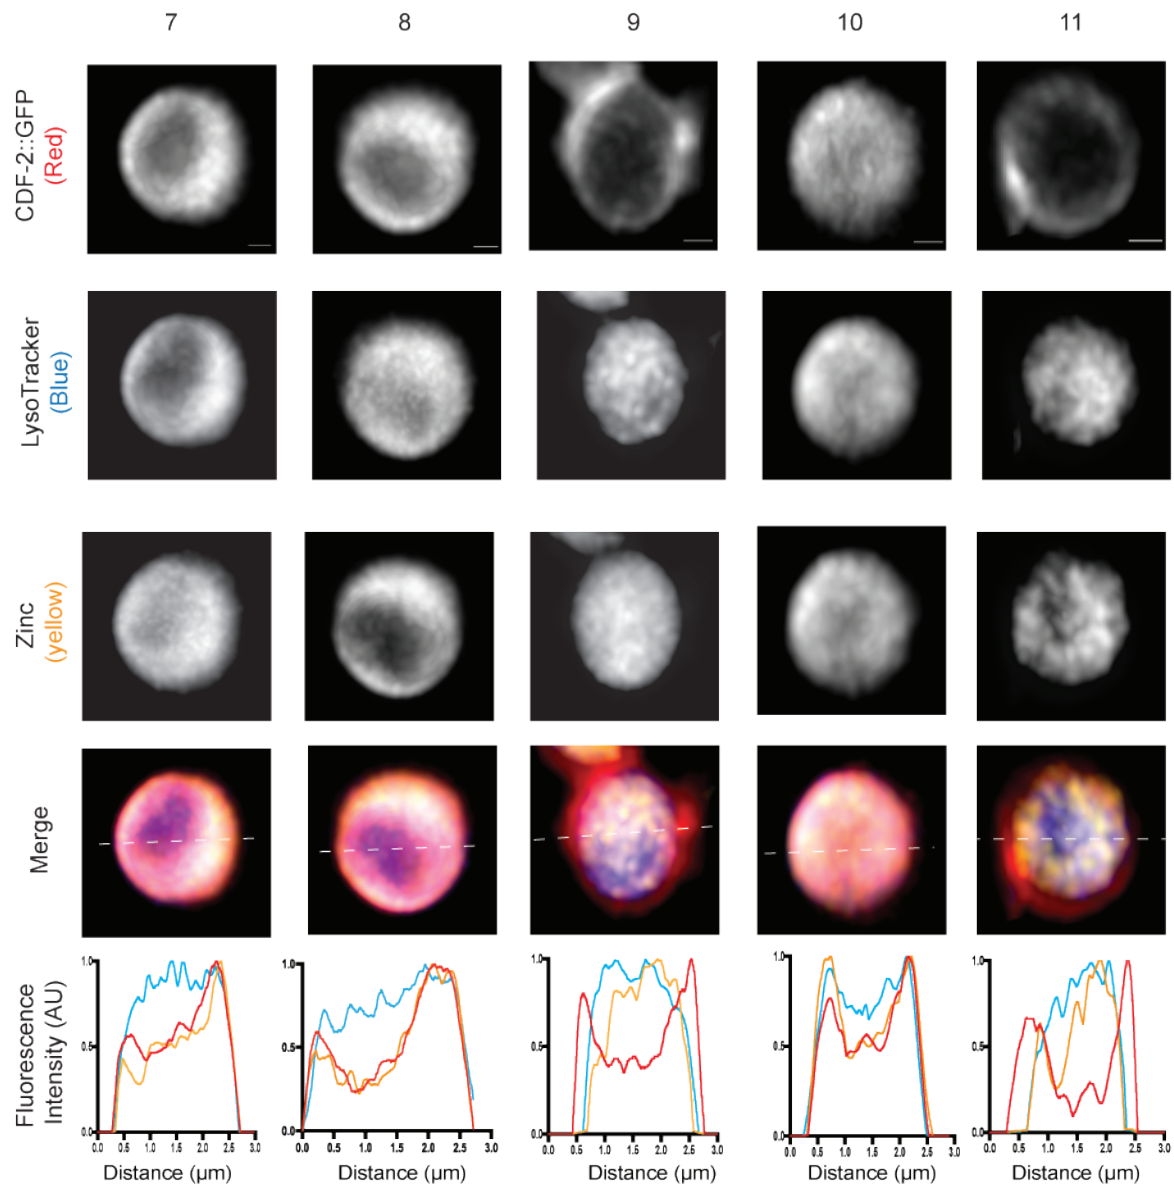

|       |                     |      |                     |      |                     |      |                     |      |                     |      |
|-------|---------------------|------|---------------------|------|---------------------|------|---------------------|------|---------------------|------|
| EC    | 2.5 $\mu\text{m}^3$ | 34%  | 1.2 $\mu\text{m}^3$ | 15%  | 1.6 $\mu\text{m}^3$ | 18%  | 0.2 $\mu\text{m}^3$ | 2%   | 2.8 $\mu\text{m}^3$ | 51%  |
| LR    | 4.4 $\mu\text{m}^3$ | 58%  | 6.7 $\mu\text{m}^3$ | 81%  | 6.7 $\mu\text{m}^3$ | 75%  | 8.7 $\mu\text{m}^3$ | 93%  | 2.6 $\mu\text{m}^3$ | 46%  |
| ZR    | 0.6 $\mu\text{m}^3$ | 8%   | 0.3 $\mu\text{m}^3$ | 4%   | 0.6 $\mu\text{m}^3$ | 7%   | 0.5 $\mu\text{m}^3$ | 5%   | 0.2 $\mu\text{m}^3$ | 3%   |
| Total | 7.6 $\mu\text{m}^3$ | 100% | 8.2 $\mu\text{m}^3$ | 100% | 8.9 $\mu\text{m}^3$ | 100% | 9.4 $\mu\text{m}^3$ | 100% | 5.6 $\mu\text{m}^3$ | 100% |

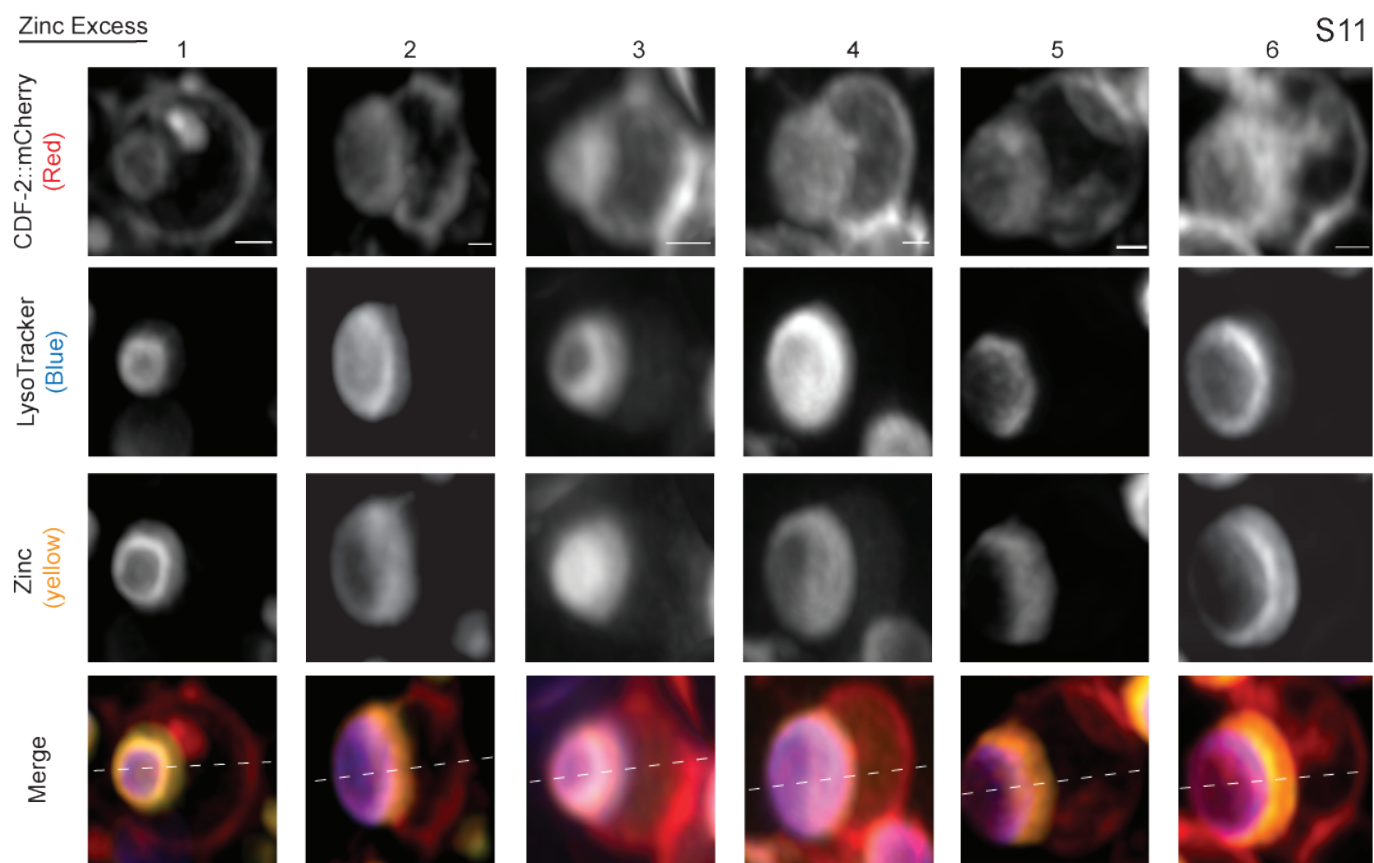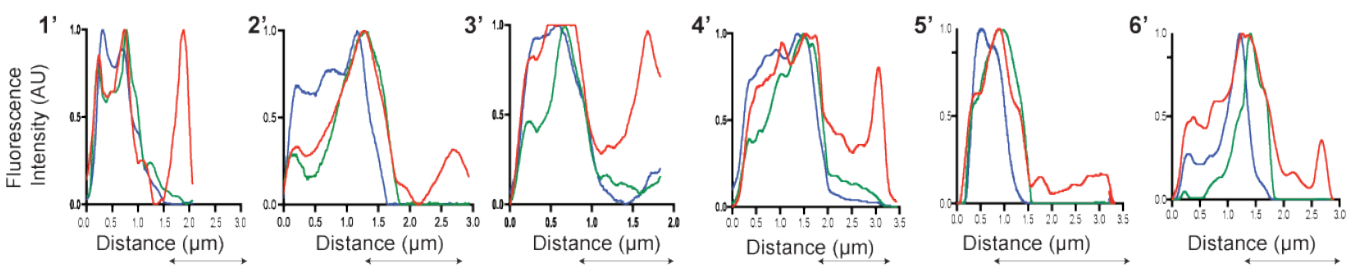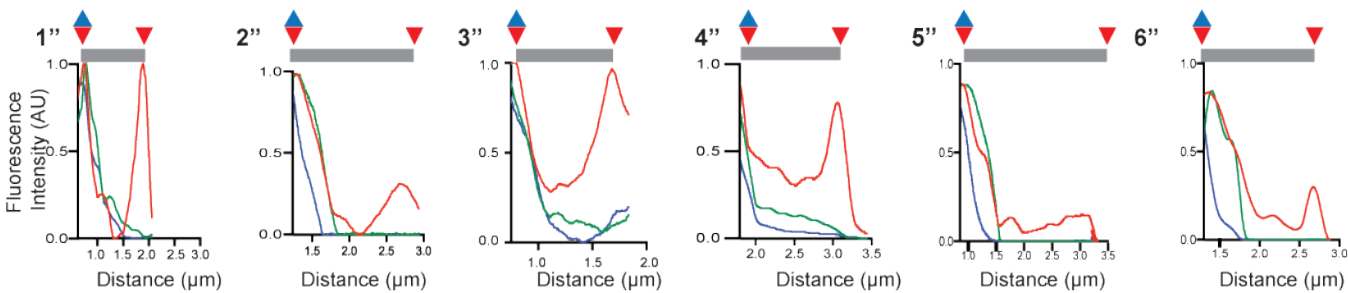

|       |                     |      |                     |      |                      |      |                     |      |                      |      |                      |      |
|-------|---------------------|------|---------------------|------|----------------------|------|---------------------|------|----------------------|------|----------------------|------|
| EC    | 5.9 $\mu\text{m}^3$ | 79%  | 6.9 $\mu\text{m}^3$ | 69%  | 1.7 $\mu\text{m}^3$  | 77%  | 6.1 $\mu\text{m}^3$ | 74%  | 12.6 $\mu\text{m}^3$ | 84%  | 9.4 $\mu\text{m}^3$  | 84%  |
| LR    | 0.6 $\mu\text{m}^3$ | 8%   | 2.6 $\mu\text{m}^3$ | 26%  | 0.5 $\mu\text{m}^3$  | 22%  | 1.5 $\mu\text{m}^3$ | 19%  | 1.4 $\mu\text{m}^3$  | 10%  | 0.9 $\mu\text{m}^3$  | 8%   |
| ZR    | 0.9 $\mu\text{m}^3$ | 12%  | 0.5 $\mu\text{m}^3$ | 5%   | 0.03 $\mu\text{m}^3$ | 1%   | 0.6 $\mu\text{m}^3$ | 7%   | 1.0 $\mu\text{m}^3$  | 6%   | 0.9 $\mu\text{m}^3$  | 8%   |
| Total | 7.5 $\mu\text{m}^3$ | 100% | 9.9 $\mu\text{m}^3$ | 100% | 2.2 $\mu\text{m}^3$  | 100% | 8.2 $\mu\text{m}^3$ | 100% | 15.0 $\mu\text{m}^3$ | 100% | 11.2 $\mu\text{m}^3$ | 100% |

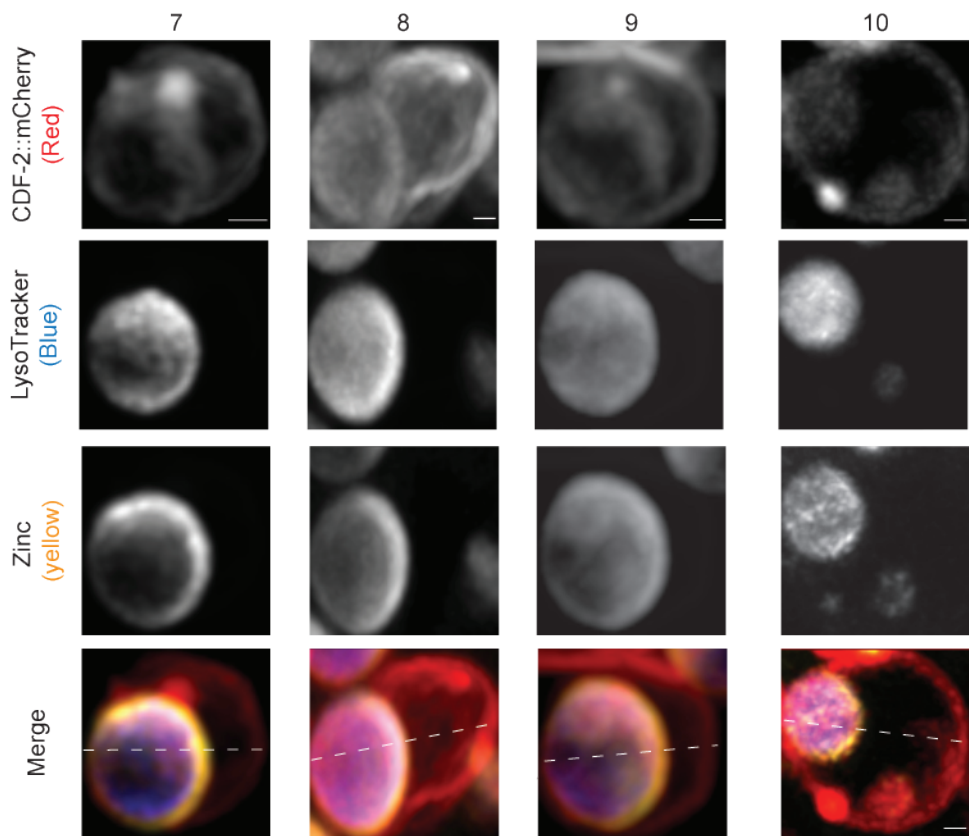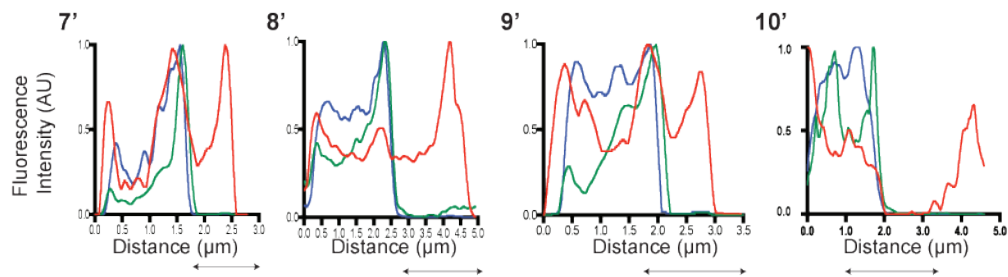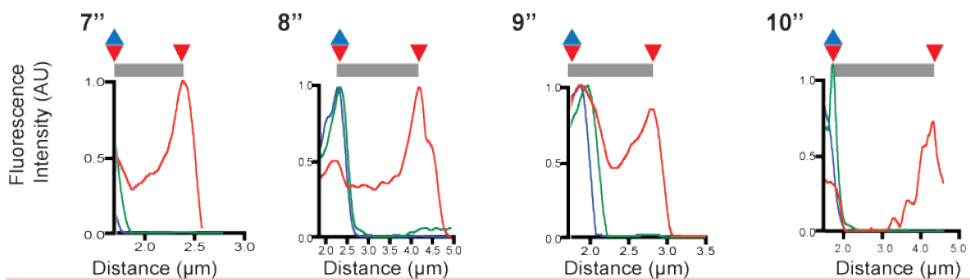

|       |                          |                           |                           |                           |
|-------|--------------------------|---------------------------|---------------------------|---------------------------|
| EC    | 6.5 $\mu\text{m}^3$ 75%  | 9.9 $\mu\text{m}^3$ 60%   | 7.7 $\mu\text{m}^3$ 67%   | 29.7 $\mu\text{m}^3$ 89%  |
| LR    | 0.9 $\mu\text{m}^3$ 10%  | 5.6 $\mu\text{m}^3$ 34%   | 2.7 $\mu\text{m}^3$ 24%   | 2.7 $\mu\text{m}^3$ 8%    |
| ZR    | 1.2 $\mu\text{m}^3$ 14%  | 1.0 $\mu\text{m}^3$ 6%    | 1.1 $\mu\text{m}^3$ 9%    | 0.9 $\mu\text{m}^3$ 3%    |
| Total | 8.7 $\mu\text{m}^3$ 100% | 16.5 $\mu\text{m}^3$ 100% | 11.5 $\mu\text{m}^3$ 100% | 33.3 $\mu\text{m}^3$ 100% |

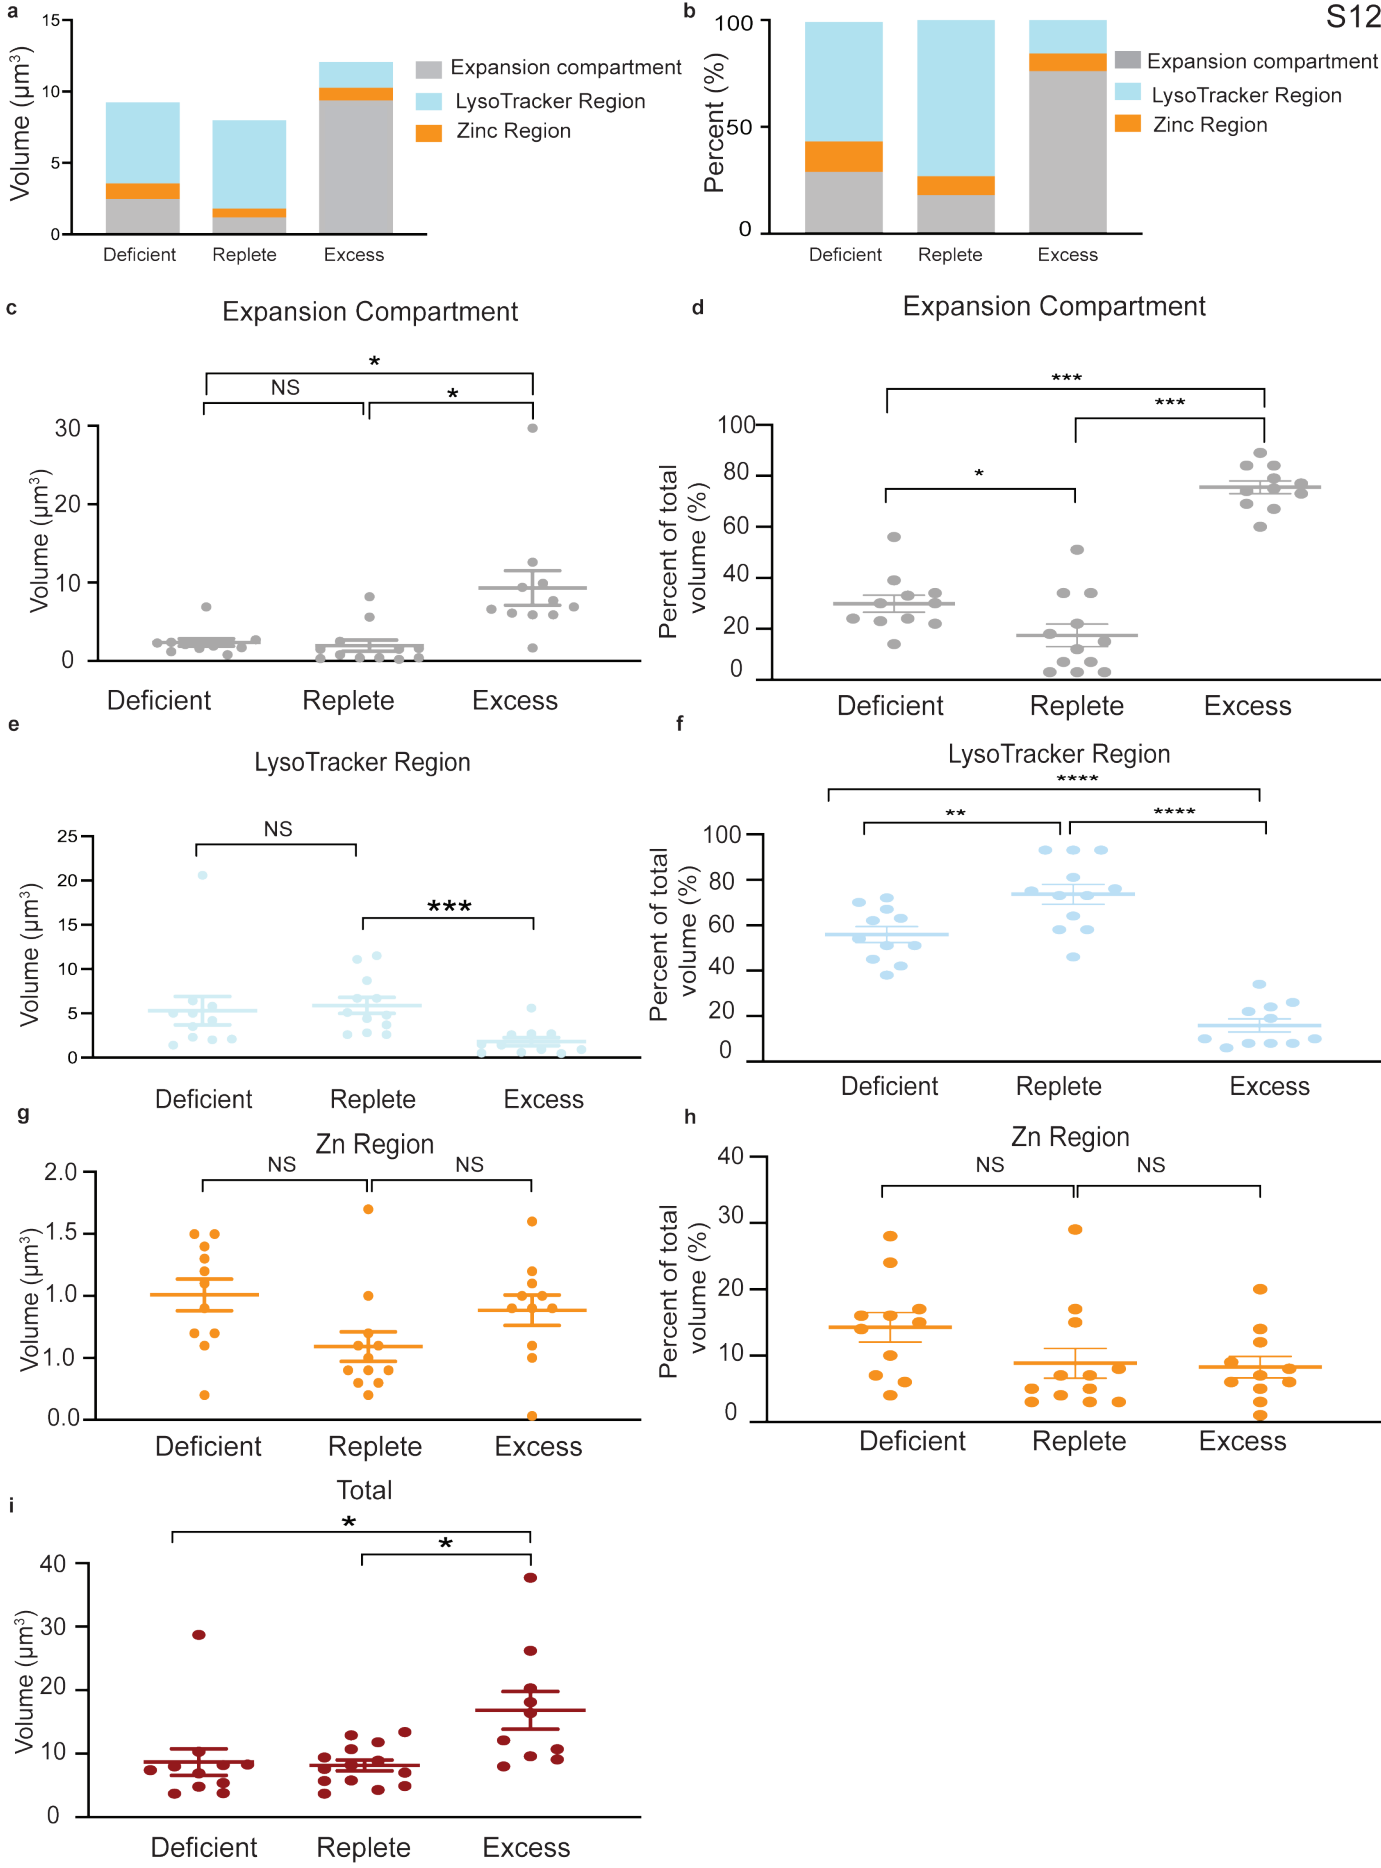

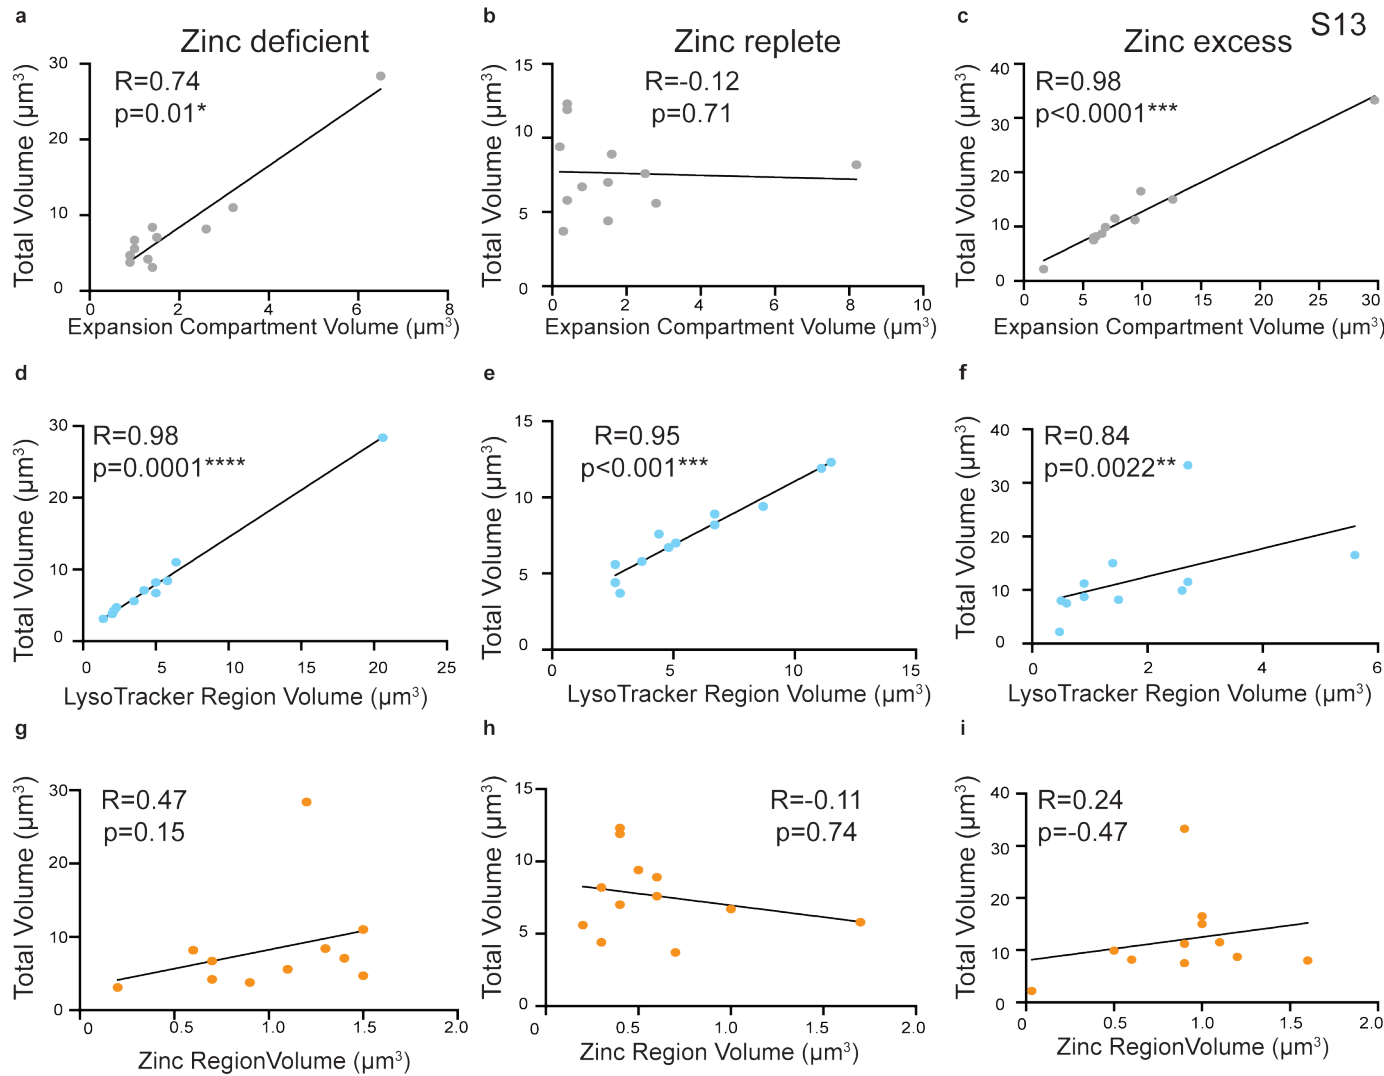

Source: https://www.biorxiv.org/content/10.1101/2021.09.18.460850v1.full.pdf
